# 1 **Neo-formation of chromosomes in bacteria**

2 Olivier B. Poirion<sup>1,2†</sup> & Bénédicte Lafay<sup>1,2,3\*</sup>

3 <sup>1</sup> Université de Lyon, F-69134 Lyon, France

4 <sup>2</sup> CNRS (French National Center for Scientific Research) UMR5005, Laboratoire  
5 Ampère, École Centrale de Lyon, 36 avenue Guy de Collongue, 69134 Écully, France

6 <sup>3</sup> CNRS (French National Center for Scientific Research) UMR5558, Laboratoire de  
7 Biométrie et Biologie Évolutive, Université Claude Bernard – Lyon 1, 43 boulevard  
8 du 11 novembre 1918, 69622 Villeurbanne cedex, France

9 † Current address: Center for Epigenomics, Department of Cellular and Molecular  
10 Medicine, University of California, San Diego, School of Medicine, 9500 Gilman Drive,  
11 La Jolla, CA 92093, USA

12 \* Author for correspondence: [benedicte.lafay@univ-lyon1.fr](mailto:benedicte.lafay@univ-lyon1.fr)

13 **ABSTRACT**

14 Although the bacterial secondary chromosomes/megaplasmiids/chromids, first noticed  
15 about forty years ago, are commonly held to originate from stabilized plasmids, their  
16 true nature and definition are yet to be resolved. On the premise that the integration of a  
17 replicon within the cell cycle is key to deciphering its essential nature, we show that the  
18 content in genes involved in the replication, partition and segregation of the replicons  
19 and in the cell cycle discriminates the bacterial replicons into chromosomes, plasmids,  
20 and another class of essential genomic elements that function as chromosomes. These  
21 latter do not derive directly from plasmids. Rather, they arise from the fission of a multi-  
22 replicon molecule corresponding to the co-integrated and rearranged ancestral  
23 chromosome and plasmid. All essential replicons in a distributed genome are thus neo-  
24 chromosomes. Having a distributed genome appears to extend and accelerate the  
25 exploration of the bacterial genome evolutionary landscape, producing complex  
26 regulation and leading to novel eco-phenotypes and species diversification.

## 27 INTRODUCTION

28 Chromosomes are the only components of the genome that encode the necessary  
29 information for replication and life of the cell/organism under normal growth conditions.  
30 Their number varies across taxa, a single chromosome being the standard in bacteria  
31 (Krawiec and Riley, 1990). Evidence accumulated over the past forty years is proving  
32 otherwise: bacterial genomes can be distributed on more than one chromosome-like  
33 autonomously replicating genomic element (replicon) (Casjens, 1998; diCenzo and  
34 Finan, 2017; Mackenzie et al., 2004). The largest, primary, essential replicon (ER) in a  
35 multipartite genome corresponds to a *bona fide* chromosome and the additional,  
36 secondary, ERs (SERs) are expected to derive from accessory replicons (plasmids  
37 (Lederberg, 1998)). The most popular model of SER formation posits that a plasmid  
38 acquired by a mono-chromosome progenitor bacterium is stabilized in the genome  
39 through the transfer from the chromosome of genes essential to the cell viability  
40 (diCenzo and Finan, 2017; diCenzo et al., 2013; Slater et al., 2009). The existence in  
41 SERs of plasmid-like replication and partition systems (Dubarry et al., 2006; Egan and  
42 Waldor, 2003; Livny et al., 2007; MacLellan et al., 2004, 2006; Slater et al., 2009;  
43 Yamaichi et al., 2007) as well as experimental results (diCenzo et al., 2014) support this  
44 view. Yet, the duplication and maintenance processes of SERs contrast with the typical  
45 behaviour of plasmids for which both the timing of replication initiation and the  
46 centromere movement are random (Million-Weaver and Camps, 2014; Reyes-Lamothe  
47 et al., 2014). Indeed, the SERs share many characteristic features with chromosomes:  
48 enrichment in Dam methylation sites of the replication origin (Egan and Waldor, 2003;  
49 Gerding et al., 2015), presence of initiator titration sites (Egan and Waldor, 2003;  
50 Venkova-Canova and Chattoraj, 2011), synchronization of the replication with the cell  
51 cycle (De Nisco et al., 2014; Deghelt et al., 2014; Egan and Waldor, 2003; Egan et al.,

52 2004; Fiebig et al., 2006; Frage et al., 2016; Kahng and Shapiro, 2003; Rasmussen et al.,  
53 2007; Srivastava et al., 2006; Stokke et al., 2011), KOPS-guided FtsK translocation (Val  
54 et al., 2008), FtsK-dependent dimer resolution system (Val et al., 2008), MatP/matS  
55 macrodomain organisation system (Demarre et al., 2014), and similar fine-scale  
56 segregation dynamics (Fiebig et al., 2006; Frage et al., 2016). Within a multipartite  
57 genome, the replication of the chromosome and that of the SER(s) are initiated at  
58 different time points (De Nisco et al., 2014; Deghelt et al., 2014; Fiebig et al., 2006;  
59 Frage et al., 2016; Rasmussen et al., 2007; Srivastava et al., 2006; Stokke et al., 2011),  
60 and use replicon-specific systems (Drevinek et al., 2008; Egan and Waldor, 2003;  
61 Galardini et al., 2013; MacLellan et al., 2004, 2006; Slater et al., 2009). Yet, they are  
62 coordinated, hence maintaining the genome stoichiometry (Deghelt et al., 2014; Egan et  
63 al., 2004; Fiebig et al., 2006; Frage et al., 2016; Stokke et al., 2011). In the few species  
64 where this was studied, the replication of the SER is initiated after that of the  
65 chromosome (De Nisco et al., 2014; Deghelt et al., 2014; Fiebig et al., 2006; Frage et al.,  
66 2016; Rasmussen et al., 2007; Srivastava, 2006; Stokke et al., 2011) under various  
67 modalities. In the Vibrionaceae, the replication of a short region of the chromosome  
68 licenses the SER duplication (Baek and Chattoraj, 2014; Kemter et al., 2018), and the  
69 advancement of the SER replication and segregation triggers the divisome assembly  
70 (Galli et al., 2016). In turn, the altering of the chromosome replication does not affect  
71 the replication initiation control of the SER in  $\alpha$ -proteobacterium *Ensifer/Sinorhizobium*  
72 *meliloti* (Frage et al., 2016).

73 Beside the exploration of the replication/segregation mechanistic, studies of multipartite  
74 genomes, targeting a single bacterial species or genus (diCenzo et al., 2013, 2014;  
75 Dubarry et al., 2006; Mackenzie et al., 2004; Slater et al., 2009) or using a more  
76 extensive set of taxa (diCenzo and Finan, 2017; Harrison et al., 2010), relied on

77 inadequate (replicon size, nucleotide composition, coding of core essential genes for  
78 growth and survival (diCenzo and Finan, 2017; Harrison et al., 2010; Liu et al., 2015);  
79 Figure 1) and/or oriented (presence of plasmid-type systems for genome maintenance  
80 and replication initiation (Harrison et al., 2010)) criteria to characterize the SERs.

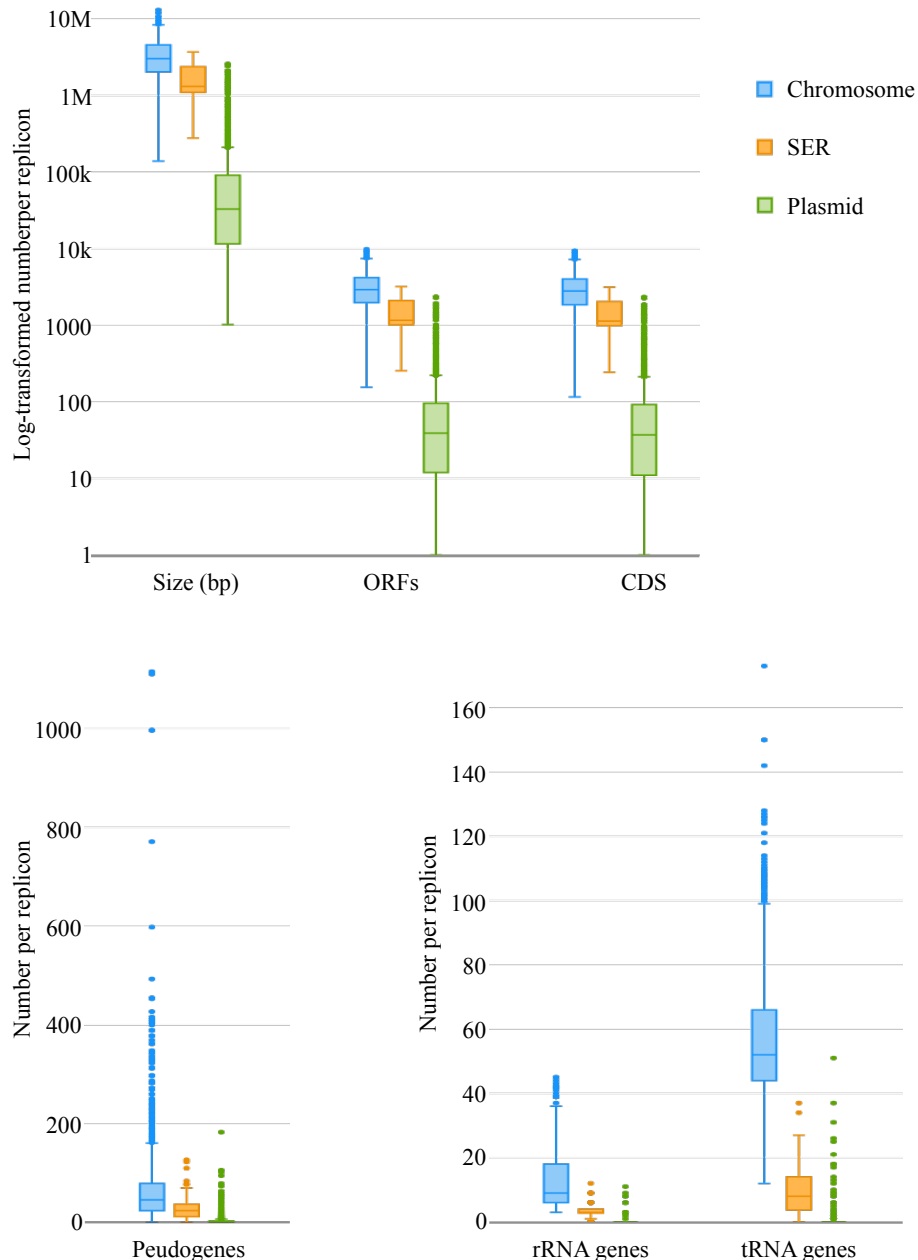

81

82

**Figure 1. Structural features of the replicons**

83 Boxplots of the lengths (base pairs) and numbers of genes (ORFs), protein-coding genes (CDS), pseudogenes,  
84 ribosomal RNA genes and transfer RNA genes for the 2016 chromosomes (blue), 129 SERs (orange), and 2783  
85 plasmids (green) included in the final dataset (4928 replicons).

86 While clarifying the functional and evolutionary contributions of each type of replicon  
87 to a multipartite genome in given bacterial lineages (Galardini et al., 2013; Harrison et  
88 al., 2010; MacLellan et al., 2004; Slater et al., 2009), these studies produced no absolute  
89 definition of SERs (diCenzo and Finan, 2017; Harrison et al., 2010) or universal model  
90 for their emergence (diCenzo and Finan, 2017; diCenzo et al., 2013, 2014; Galardini et  
91 al., 2013; Harrison et al., 2010). We thus set out investigating the nature(s) and origin(s)  
92 of these replicons using as few assumptions as possible.

## 93 **RESULTS**

### 94 **Replicon inheritance systems as diagnostic features**

95 We did not limit our study to a particular multipartite genome or a unique gene family.  
96 Rather, we performed a global analysis encompassing all bacterial replicons whose  
97 complete sequence was available in public sequence databases (Figure 2). We reasoned  
98 that the key property discriminating the chromosomes from the plasmids is their  
99 transmission from mother to daughter cells during the bacterial cell cycle. The functions  
100 involved in the replication, partition and maintenance of a replicon, *i.e.*, its inheritance  
101 systems (ISs), thence are expected to reflect the replicon degree of integration into the  
102 host cycle.

103 We first faced the challenge of identifying all IS functional homologues. The inheritance  
104 of genetic information requires functionally diverse and heterogeneous actuators  
105 depending on the replicon type and the characteristics of the organism. Also, selecting  
106 sequence orthologues whilst avoiding false positives (*e.g.*, sequence paralogues) can be  
107 tricky since remote sequence homology most likely prevails among  
108 chromosome/plasmid protein-homologue pairs.

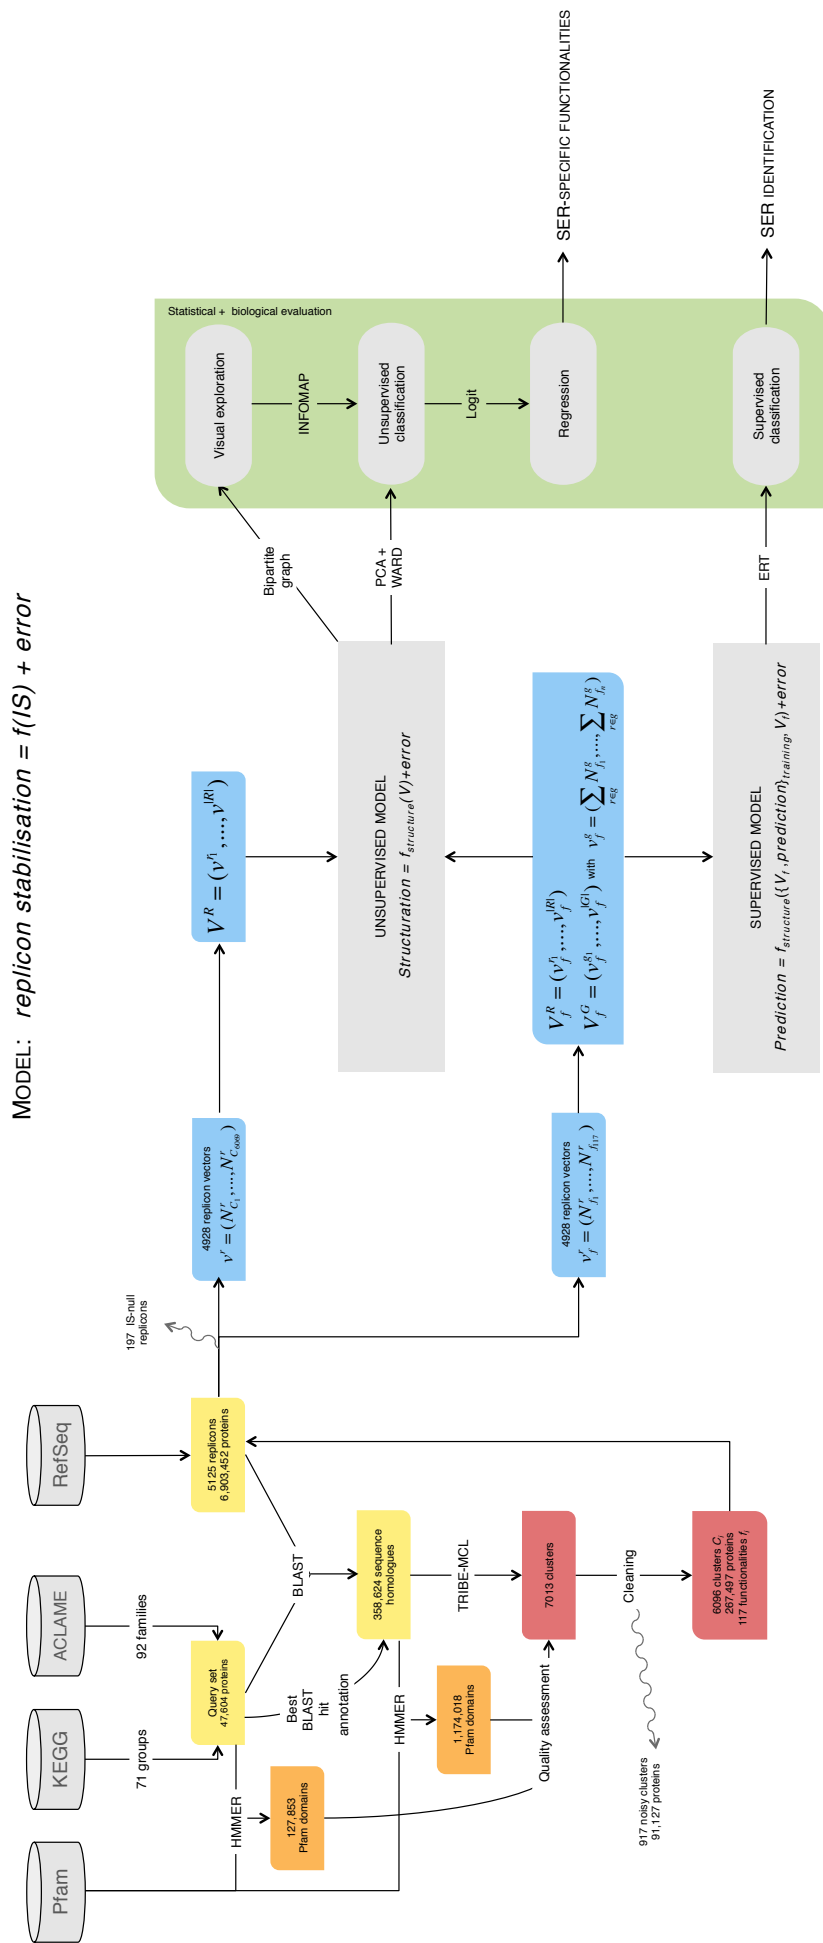

**Figure 2. Analytical procedure**

110 Starting from an initial dataset of 5125 replicons, we identified 358,624 putative IS  
 111 functional homologues, overall corresponding to 1711 Pfam functional domains (Figure  
 112 3a), using a query set of 47,604 chromosomal and plasmidic IS-related proteins selected  
 113 from the KEGG and ACLAME databases (Tables 1 and 2).

114 **Table 1. ACLAME families used in the building of the query set**

| PROCESS     | FAMILY | PROTEIN DESCRIPTION                                                                                                  |
|-------------|--------|----------------------------------------------------------------------------------------------------------------------|
|             | 32     | RepB, pi, initiator protein, RepE, RepA                                                                              |
|             | 76     | Rep, RepB, Rep of rolling circle initiator, RepA, RepU, OrfB, Rep2                                                   |
|             | 107    | RepC, RepCa1, RepCa2, RepCd                                                                                          |
|             | 114    | Helicase, UrvD rep helicase, helicase super family 1, Yga2F, helicase II                                             |
|             | 118    | CdsE, CdsJ                                                                                                           |
|             | 133    | RepA, W0005, RepA1/A2                                                                                                |
|             | 171    | RepA, RepB, putative theta replicative protein                                                                       |
|             | 207    | replicative DNA helicase, DnaB, pGP1                                                                                 |
|             | 208    | RepA, W0013, W0041, RepFIB                                                                                           |
|             | 224    | long form TrfA, TrfA1, TrfA2, S-TrfA, plasmid initiation protein                                                     |
|             | 237    | RepA, putative RepA, truncated RepA                                                                                  |
|             | 244    | RepA, RepB, CopB, repA1/A2, w0004                                                                                    |
|             | 294    | Rop regulatory protein, RNAI modulator, RNA modulator, plasmid copy number control                                   |
|             | 297    | primase activity/DNA initiation, LtrC/LtrC-like hypothetical protein, PcfD                                           |
|             | 330    | DNA repair/ DNA helicase, type III restriction enzyme, res subunit, DEAD/DEAH box helicase                           |
|             | 377    | replicase, replication initiation, RepC, RepJ, RepE, RepL                                                            |
|             | 383    | RepA, Rb100                                                                                                          |
|             | 404    | RepA,RepB,RepW                                                                                                       |
| Replication | 412    | Rep, RepA                                                                                                            |
|             | 423    | truncated RCR replication, RepRC, RepB, OrfA                                                                         |
|             | 426    | cell division control protein 6 homolog                                                                              |
|             | 440    | Rep 14-4, rm protein, RepA hypothetical protein                                                                      |
|             | 451    | RepA, host type : <i>Corynebacterium</i>                                                                             |
|             | 477    | Rep, RepS, RepE, host type : <i>Bacillus</i> , RepS, RepR                                                            |
|             | 612    | RepL, replication initiation                                                                                         |
|             | 775    | DNA helicase activity, RepA, putative helicase                                                                       |
|             | 854    | DNA helicase activity, RepC, putative initiator protein                                                              |
|             | 921    | RepA                                                                                                                 |
|             | 931    | DNA replication initiation, putative protein, CdsD                                                                   |
|             | 1005   | helicase activity, putative protein, hypothetical helicase                                                           |
|             | 1055   | RNA polymerase $\sigma$ factor, $\sigma$ 70 family, bacteriocin uviA, sigF/V/G, tetR, host type : <i>Clostridium</i> |
|             | 1095   | DNA repair/helicase, RuvB, DNA pol III $\gamma$ and $\tau$ subunits, DNA pol $\delta$ subunit                        |
|             | 1099   | putative theta replicase, RepB, Rep2                                                                                 |
|             | 1187   | DNA replication, RepH, RepI                                                                                          |
|             | 1288   | RepA                                                                                                                 |
|             | 1345   | DNA primase activity, DNA primase , primase CHC2 family                                                              |
|             | 1398   | helicase activity, GcrE, GcrC                                                                                        |



|             |                                                |                                                                                                          |
|-------------|------------------------------------------------|----------------------------------------------------------------------------------------------------------|
|             | 1652                                           | DNA repair/exonuclease activity, DNA exonuclease protein, SbcCD related protein                          |
|             | 1837                                           | putative replication protein                                                                             |
|             | 2881                                           | RepC-like, Pif                                                                                           |
| Partition   | 4                                              | plasmid partition protein, ParA, ParA IncC protein, ParA Inc1/ Inc2, SopA, virC1                         |
|             | 14                                             | RepB, RepB partitioning, KorB repressor and partitioning, ParB-like domain, YefA, YdeB, ParB, ParB-like  |
|             | 102                                            | DNA binding, partitioning protein, control protein, ParB, VirB, partition protein B                      |
|             | 128                                            | DNA segregation/DNA translocase activity, cell division FtsK/ SpoIIIE, SpoI, TraB                        |
|             | 289                                            | ParM family, go : translocase, hypothetical protein, rode shape protein, putative ATPase of class HSP70  |
|             | 316                                            | microfilament motor activity, ParM family, StbA protein, stable inheritance protein, ParA                |
|             | 318                                            | ATPase, regulation of cell division, chromosome partition, GumC, ExoP related protein, EpsB, MPA1 family |
|             | 427                                            | ATPase family, ParR family, ParB, StbB, mediator of plasmid stability                                    |
|             | 875                                            | DNA binding, partitioning protein family ParB/Spo0J, YPMT1.28c                                           |
|             | 876                                            | DNA binding, partitioning protein family ParB/Spo0J, YPMT1.29c                                           |
|             | 983                                            | DNA binding, ParB, CopG                                                                                  |
|             | 1227                                           | DNA plasmid copy number control, CopG                                                                    |
|             | 2158                                           | RepC                                                                                                     |
|             | 2894                                           | DNA binding                                                                                              |
|             | Dimer resolution                               | 5                                                                                                        |
| 10          |                                                | tyrosine-based recombinase, integrase, putative integrase, Xer, recombinase-like SAM                     |
| 101         |                                                | plasmid dimer resolution, tyrosine-based recombinase, yld, SAM-like protein                              |
| 170         |                                                | tyrosine-based recombinase, OrfA, hypothetical protein                                                   |
| 589         |                                                | tyrosine based protein, Fis protein                                                                      |
| 688         | tyrosine based protein, SAM like protein, XerD |                                                                                                          |
| Maintenance | 100                                            | Postsegregational killing system vapBC/vag                                                               |
|             | 136                                            | Postsegregational killing system parDE                                                                   |
|             | 156                                            | Postsegregational killing system epsilon-zeta                                                            |
|             | 201                                            | Postsegregational killing system higBA                                                                   |
|             | 212                                            | Postsegregational killing system parDE                                                                   |
|             | 293                                            | Postsegregational killing system mazEF                                                                   |
|             | 319                                            | Postsegregational killing system relBE                                                                   |
|             | 326                                            | Postsegregational killing system mazEF                                                                   |
|             | 335                                            | Postsegregational killing system HOK/SOK                                                                 |
|             | 338                                            | Postsegregational killing system parDE                                                                   |
|             | 356                                            | Postsegregational killing system parDE                                                                   |
|             | 366                                            | Postsegregational killing system vapBC/vag                                                               |
|             | 380                                            | Postsegregational killing system phD-doc                                                                 |
|             | 428                                            | Postsegregational killing system ccd                                                                     |
|             | 470                                            | Postsegregational killing system yacA                                                                    |
|             | 474                                            | Postsegregational killing system relBE                                                                   |
|             | 515                                            | Postsegregational killing system relBE                                                                   |
|             | 556                                            | Postsegregational killing system higBA                                                                   |
|             | 563                                            | Postsegregational killing system ccd                                                                     |
|             | 588                                            | Postsegregational killing system higBA                                                                   |
|             | 677                                            | Postsegregational killing system higBA                                                                   |
|             | 798                                            | Postsegregational killing system mazEF                                                                   |
|             | 916                                            | Postsegregational killing system relBE                                                                   |
| 1031        | Postsegregational killing system HOK/SOK       |                                                                                                          |
| 1180        | Postsegregational killing system vapXD         |                                                                                                          |
| 1308        | Postsegregational killing system HicAB         |                                                                                                          |
| 1559        | Postsegregational killing system epsilon-zeta  |                                                                                                          |
| 1927        | Postsegregational killing system mazEF         |                                                                                                          |

|       |                                                       |
|-------|-------------------------------------------------------|
| 3357  | Postsegregational killing system, plasmid maintenance |
| 4776  | Postsegregational killing system, parC                |
| 4777  | Postsegregational killing system parDE, parD          |
| 16584 | Postsegregational killing system vapXD                |

115 **Table 2. KEGG “Prokaryotic-type chromosome” orthology groups used in the building of the**  
116 **query set**

| BRITE HIERARCHY             | KEGG ENTRY                           | NAME          | DEFINITION                                             |                                                     |
|-----------------------------|--------------------------------------|---------------|--------------------------------------------------------|-----------------------------------------------------|
| Chromosome replication      | <i>K02313</i>                        | DnaA          | chromosomal replication initiator protein              |                                                     |
|                             | <i>K02314</i>                        | DnaB          | replicative DNA helicase [EC:3.6.4.12]                 |                                                     |
|                             | <i>K03346</i>                        | DnaB2, DnaB   | replication initiation and membrane attachment protein |                                                     |
|                             | <i>K02315</i>                        | DnaC          | DNA replication factor, helicase loader                |                                                     |
|                             | <i>K02316</i>                        | DnaG          | DNA primase [EC:2.7.7.-]                               |                                                     |
|                             | <i>K11144</i>                        | DnaI          | primosomal protein DnaI                                |                                                     |
|                             | <i>K05787</i>                        | HupA          | DNA-binding protein HU-alpha                           |                                                     |
|                             | <i>K03530</i>                        | hupB          | DNA-binding protein HU-beta                            |                                                     |
|                             | <i>K04764</i>                        | IhfA, HimA    | integration host factor subunit alpha                  |                                                     |
|                             | <i>K05788</i>                        | IhfB, HimD    | integration host factor subunit beta                   |                                                     |
|                             | <i>K03111</i>                        | ssb           | single-strand DNA-binding protein                      |                                                     |
|                             | Terminus site-binding protein        | <i>K10748</i> | Tus, Tau                                               | DNA replication terminus site-binding protein       |
|                             | DNA methylation enzyme               | <i>K06223</i> | Dam                                                    | DNA adenine methylase [EC:2.1.1.72]                 |
|                             | Prevention of re-replication factors | <i>K10763</i> | Hda                                                    | DnaA-homolog protein                                |
| <i>K03645</i>               |                                      | SeqA          | negative modulator of initiation of replication        |                                                     |
| Chromosome partition        | <i>K03632</i>                        | MukB          | chromosome partition protein MukB                      |                                                     |
|                             | <i>K03804</i>                        | MukE          | chromosome partition protein MukE                      |                                                     |
|                             | <i>K03633</i>                        | MukF          | chromosome partition protein MukF                      |                                                     |
|                             | Condensin-like complex               | <i>K03529</i> | Smc                                                    | chromosome segregation protein                      |
|                             |                                      | <i>K05896</i> | ScpA                                                   | segregation and condensation protein A              |
|                             |                                      | <i>K06024</i> | ScpB                                                   | segregation and condensation protein B              |
|                             | Divisome proteins                    | <i>K03585</i> | AcrA                                                   | membrane fusion protein                             |
|                             |                                      | <i>K01448</i> | AmiA, AmiB, AmiC                                       | N-acetylmuramoyl-L-alanine amidase [EC:3.5.1.28]    |
|                             |                                      | <i>K13052</i> | DivIC, DivA                                            | cell division protein DivIC                         |
|                             |                                      | <i>K03590</i> | FtsA                                                   | cell division protein FtsA                          |
|                             |                                      | <i>K05589</i> | FtsB                                                   | cell division protein FtsB                          |
|                             |                                      | <i>K09812</i> | FtsE                                                   | cell division transport system ATP-binding protein  |
|                             |                                      | <i>K03587</i> | FtsI                                                   | cell division protein FtsI [EC:2.4.1.129]           |
|                             |                                      | <i>K03466</i> | FtsK, SpoIIIE                                          | DNA segregation ATPase FtsK/SpoIIIE, S-DNA-T family |
| <i>K03586</i>               |                                      | FtsL          | cell division protein FtsL                             |                                                     |
| <i>K03591</i>               |                                      | FtsN          | cell division protein FtsN                             |                                                     |
| <i>K03589</i>               |                                      | FtsQ          | cell division protein FtsQ                             |                                                     |
| <i>K03588</i>               |                                      | FtsW, SpoVE   | cell division protein FtsW                             |                                                     |
| <i>K09811</i>               |                                      | FtsX          | cell division transport system permease protein        |                                                     |
| <i>K03531</i>               |                                      | FtsZ          | cell division protein FtsZ                             |                                                     |
| <i>K09888</i>               |                                      | ZapA          | cell division protein ZapA                             |                                                     |
| <i>K03528</i>               |                                      | ZipA          | cell division protein ZipA                             |                                                     |
| Inhibitors of FtsZ assembly | <i>K04074</i>                        | DivIVA        | cell division initiation protein                       |                                                     |
|                             | <i>K06286</i>                        | EzrA          | septation ring formation regulator                     |                                                     |

|                                        |               |                                                 |                                                                             |                                                                                  |
|----------------------------------------|---------------|-------------------------------------------------|-----------------------------------------------------------------------------|----------------------------------------------------------------------------------|
|                                        | <i>K03610</i> | MinC                                            | septum site-determining protein MinC                                        |                                                                                  |
|                                        | <i>K03609</i> | MinD                                            | septum site-determining protein MinD                                        |                                                                                  |
|                                        | <i>K03608</i> | MinE                                            | cell division topological specificity factor                                |                                                                                  |
|                                        | <i>K05501</i> | SlmA, Ttk                                       | TetR/AcrR family transcriptional regulator                                  |                                                                                  |
|                                        | <i>K09772</i> | SepF                                            | cell division inhibitor SepF                                                |                                                                                  |
|                                        | <i>K13053</i> | SulA                                            | cell division inhibitor, FtsZ assembly inhibitor                            |                                                                                  |
| Other chromosome partitioning proteins | <i>K04095</i> | Fic                                             | cell filamentation protein                                                  |                                                                                  |
|                                        | <i>K04094</i> | Gid, TrmFO                                      | methylenetetrahydrofolate--tRNA-[uracil-5-]-methyltransferase [EC:2.1.1.74] |                                                                                  |
|                                        | <i>K03495</i> | GidA, MnmG, MTO1                                | tRNA uridine 5-carboxymethylaminomethyl modification enzyme                 |                                                                                  |
|                                        | <i>K03501</i> | GidB, RsmG                                      | 16S rRNA [guanine527-N7]-methyltransferase [EC:2.1.1.170]                   |                                                                                  |
|                                        | <i>K03569</i> | MreB                                            | rod shape-determining protein MreB and related proteins                     |                                                                                  |
|                                        | <i>K03570</i> | MreC                                            | rod shape-determining protein MreC                                          |                                                                                  |
|                                        | <i>K03571</i> | MreD                                            | rod shape-determining protein MreD                                          |                                                                                  |
|                                        | <i>K03593</i> | Mrp                                             | ATP-binding protein involved in chromosome partitioning                     |                                                                                  |
|                                        | <i>K03496</i> | ParA, Soj                                       | chromosome partitioning protein                                             |                                                                                  |
|                                        | <i>K03497</i> | ParB, SpoJ                                      | chromosome partitioning protein, ParB family                                |                                                                                  |
|                                        | <i>K02621</i> | ParC                                            | topoisomerase IV subunit A [EC:5.99.1.-]                                    |                                                                                  |
|                                        | <i>K02622</i> | ParE                                            | topoisomerase IV subunit B [EC:5.99.1.-]                                    |                                                                                  |
|                                        | <i>K11686</i> | RacA                                            | chromosome-anchoring protein RacA                                           |                                                                                  |
|                                        | <i>K05837</i> | RodA, MrdB                                      | rod shape determining protein RodA                                          |                                                                                  |
|                                        | <i>K03645</i> | SeqA                                            | negative modulator of initiation of replication                             |                                                                                  |
|                                        | <i>K03733</i> | XerC                                            | integrase/recombinase XerC                                                  |                                                                                  |
|                                        | <i>K04763</i> | XerD                                            | integrase/recombinase XerD                                                  |                                                                                  |
|                                        | Nucleoid      | HNS (histone-like nucleoid structuring protein) | <i>K03746</i>                                                               | H-NS                                                                             |
| <i>K11685</i>                          |               |                                                 | StpA                                                                        | DNA-binding protein StpA                                                         |
| HU (heat unstable protein)             |               | <i>K05787</i>                                   | HupA                                                                        | DNA-binding protein HU-alpha                                                     |
|                                        |               | <i>K03530</i>                                   | HupB                                                                        | DNA-binding protein HU-beta                                                      |
| IHF (integration host factor)          |               | <i>K04764</i>                                   | IhfA, HimA                                                                  | integration host factor subunit alpha                                            |
|                                        |               | <i>K05788</i>                                   | IhfB, HimD                                                                  | integration host factor subunit beta                                             |
| Other nucleoid associated proteins     |               | <i>K05516</i>                                   | CbpA                                                                        | curved DNA-binding protein                                                       |
|                                        |               | <i>K12961</i>                                   | DiaA                                                                        | chromosomal replication initiator protein                                        |
|                                        |               | <i>K02313</i>                                   | DnaA                                                                        | DnaA initiator-associating protein                                               |
|                                        |               | <i>K04047</i>                                   | Dps                                                                         | starvation-inducible DNA-binding protein                                         |
|                                        |               | <i>K03557</i>                                   | Fis                                                                         | Fis family transcriptional regulator, factor for inversion stimulation protein   |
|                                        |               | <i>K03666</i>                                   | Hfq                                                                         | host factor-I protein                                                            |
|                                        |               | <i>K05596</i>                                   | IciA                                                                        | chromosome initiation inhibitor, LysR family transcriptional regulator           |
|                                        |               | <i>K03719</i>                                   | Lrp                                                                         | leucine-responsive regulatory protein, Lrp/AsnC family transcriptional regulator |
| <i>K05804</i>                          |               | Rob                                             | right origin-binding protein, AraC family transcriptional regulator         |                                                                                  |

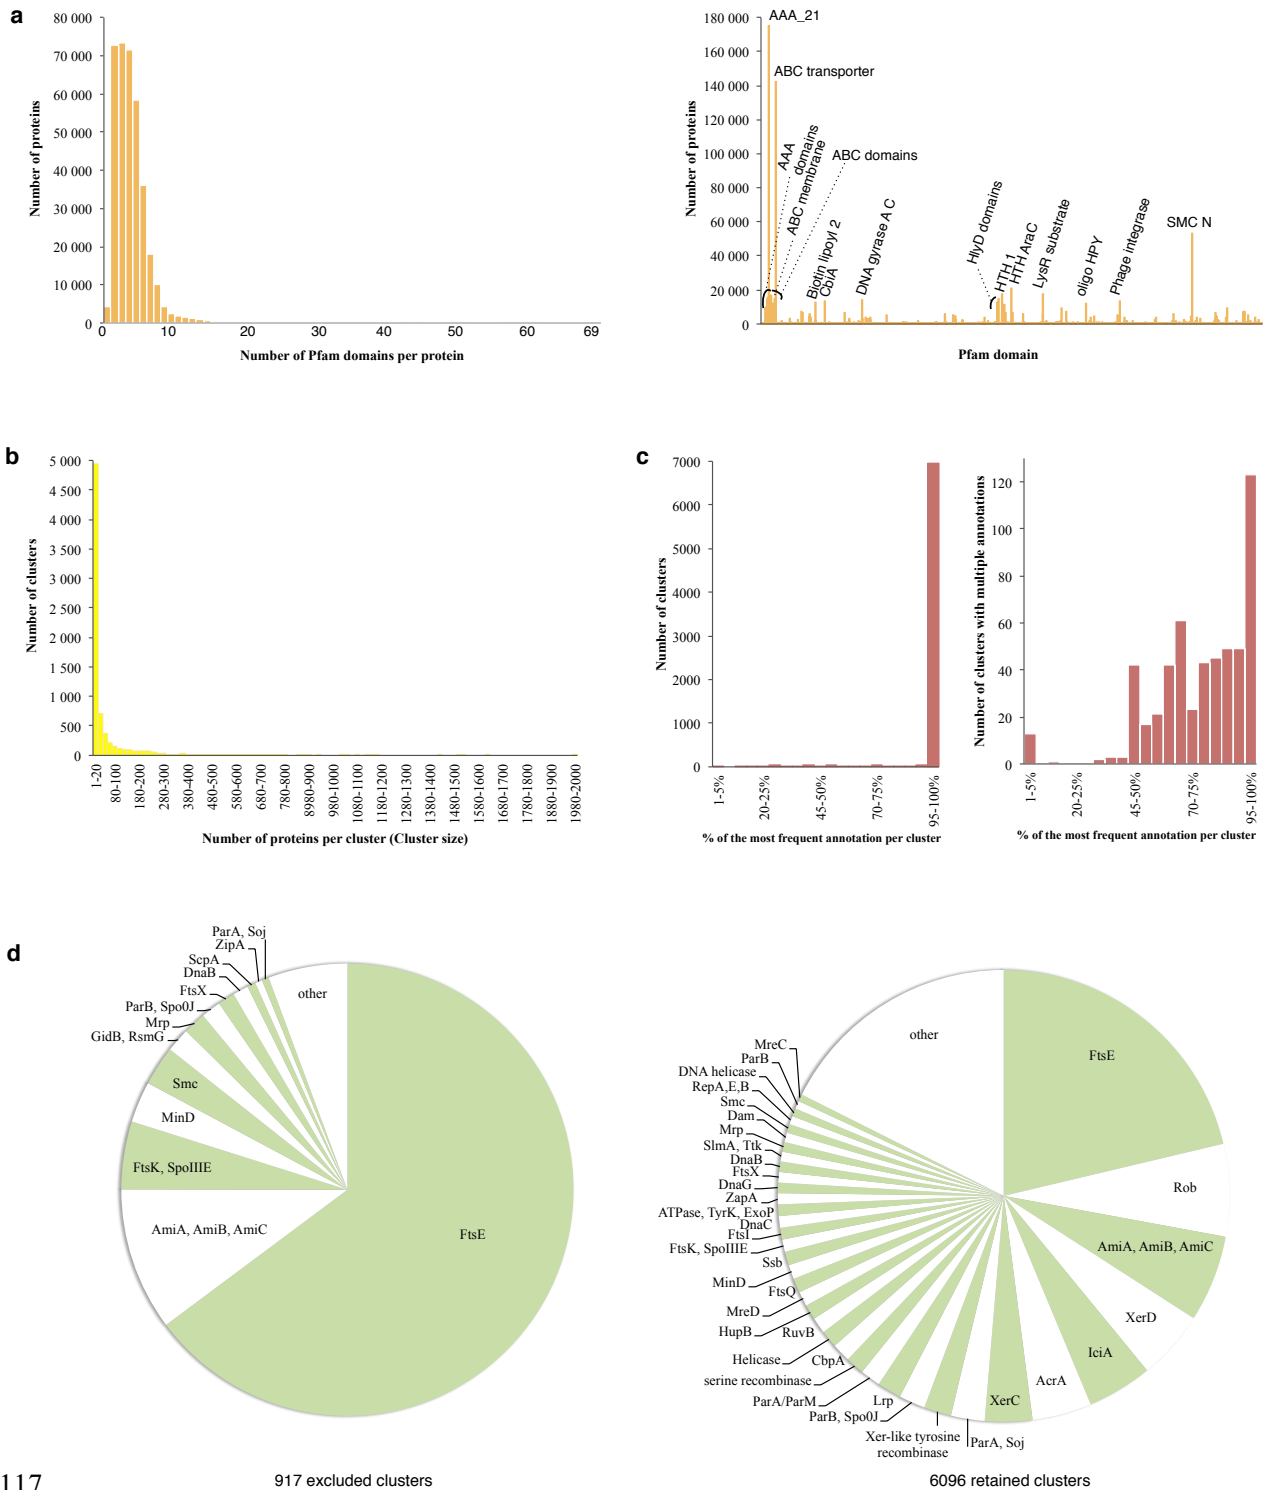

117

917 excluded clusters

6096 retained clusters

118

### Figure 3. Properties of the IS clustering

119 (a) Frequency distribution of the 358,624 putative IS protein homologues according to their number of functional domains (0 to 120 69) per protein (left), and occurrences of the 1711 functional Pfam domains (right). The 20 top most frequently encountered 121 functional domains are indicated. (b) Size distribution of the 7013 clusters, each comprising from a single to 1990 proteins. (c) Percentage distribution of the most frequent annotation per cluster among all clusters (left) and among clusters with multiple 123 annotations (right). (d) Distribution of the most frequent annotation per cluster among the 917 excluded clusters (left) and the 124 6096 clusters retained for the analysis (right).

125 We then inferred 7013 homology groups using a clustering procedure and named the  
126 clusters after the most frequent annotation found among their proteins (Figure 3b,c). Most  
127 clusters were characterized by a single annotation whilst the remaining few (4.7%) each  
128 harbored from 2 to 710 annotations, the most frequent annotation in a cluster generally  
129 representing more than half of all annotations (Figure 3c). The removal of false positives  
130 left 267,497 IS protein homologues distributed in 6096 clusters (Figure 3d) and coded by  
131 4928 replicons out of the initial replicon dataset. Following the Genbank/RefSeq  
132 annotations, our final dataset comprised 2016 complete genome sets corresponding to  
133 3592 replicons (2016 chromosomes, 129 SERs, and 1447 plasmids) and 1336 plasmid  
134 genomes (Supplementary table 1), irregularly distributed across the bacterial phylogeny  
135 (Figure 4a). Multi-ER genomes are observed in 5.0% of all represented bacterial genera  
136 and constitute 5.7% of the complete genomes (averaged over genera) available at the time  
137 of study (Figure 4b). They are merely incidental (0.2% in Firmicutes) or reach up to  
138 almost one third of the genomes (30.1% in  $\beta$ -Proteobacteria) depending on the lineage,  
139 and are yet to be observed in most bacterial phyla, possibly because of the poor  
140 representation of some lineages. Although found in ten phyla, they occur more than once  
141 per genus in only three of them: Bacteroidetes, Proteobacteria and Spirochaetae.

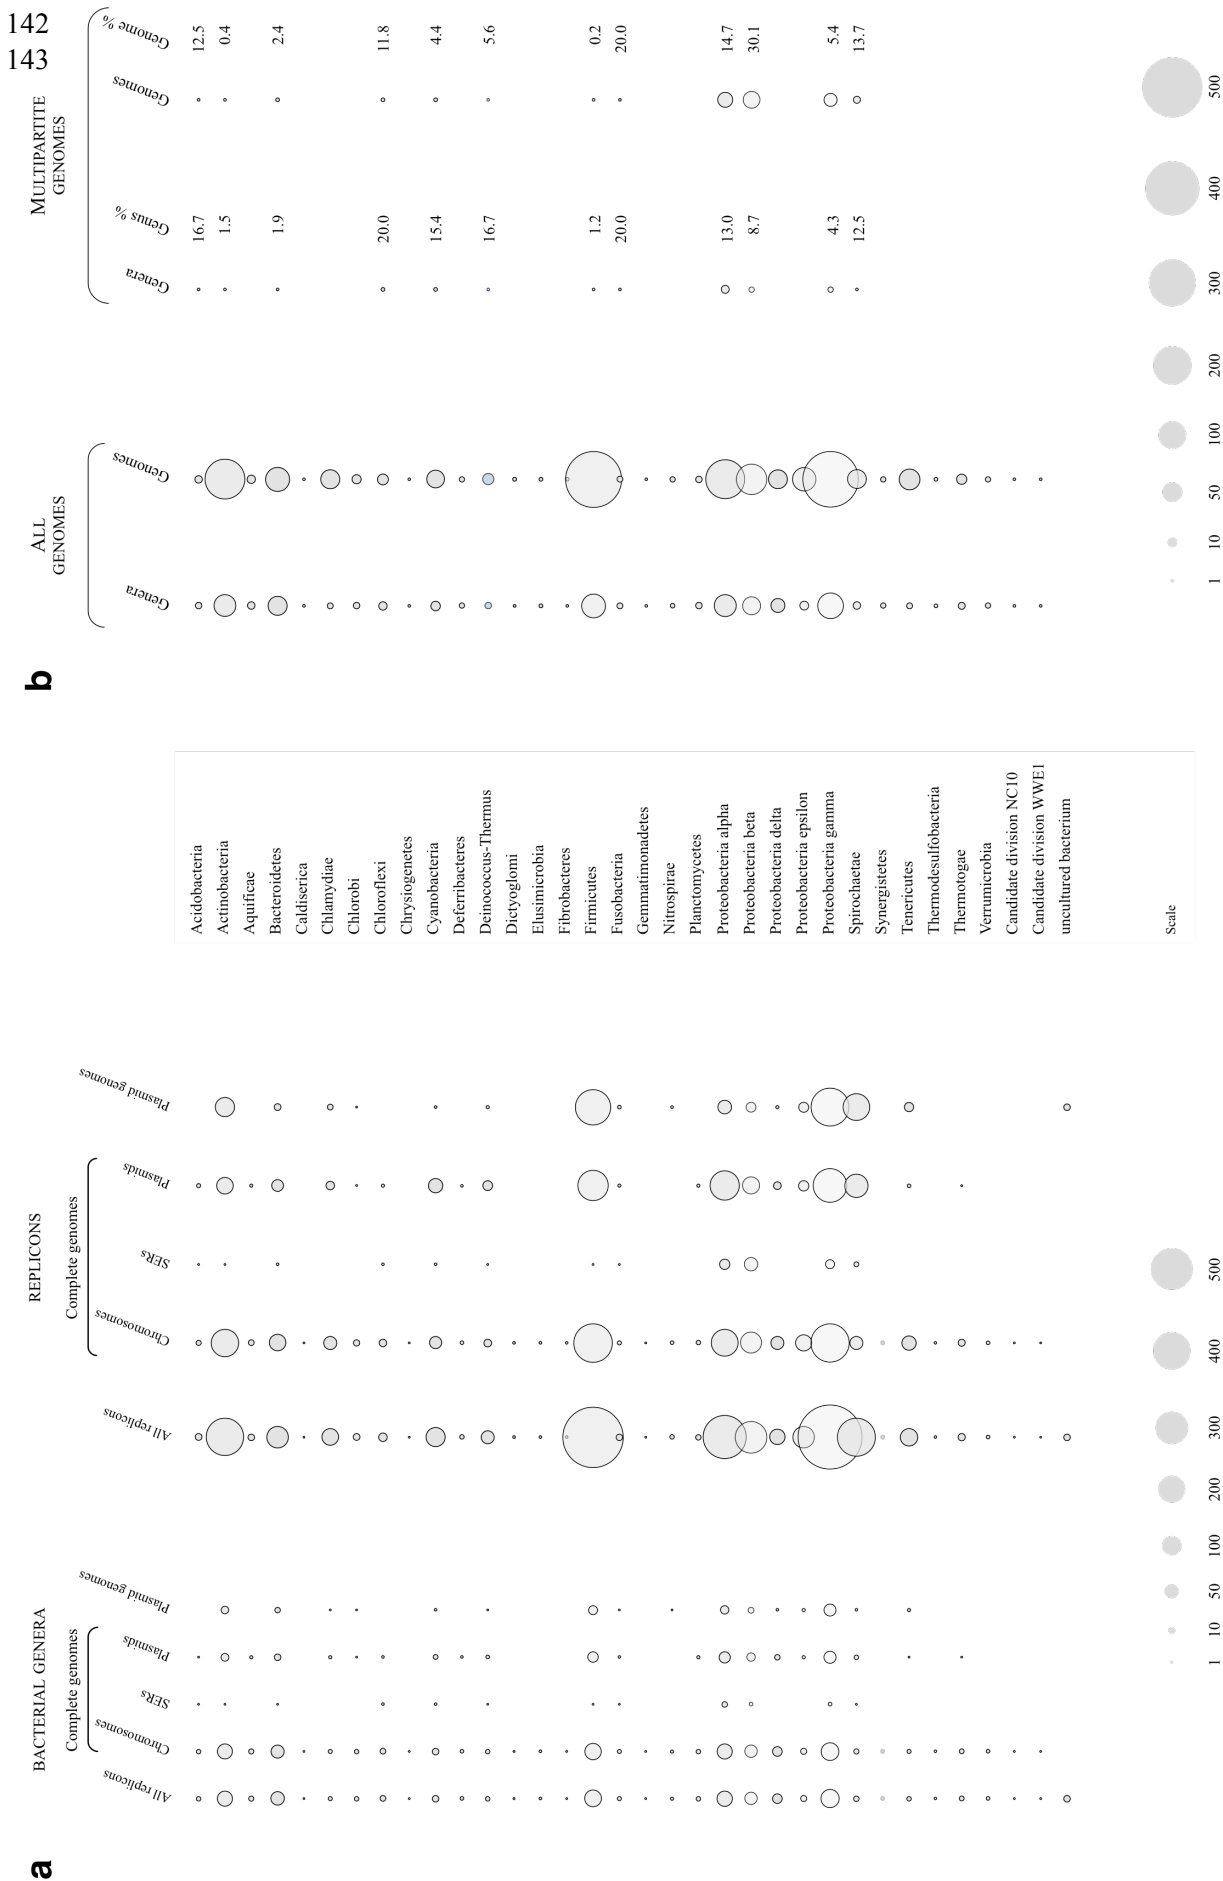

**Figure 4. Taxonomic structure of the replicon dataset**

Numbers of replicons (a) and complete genomes (b), and represented bacterial genera are shown according to datasets and host taxonomy. Surfaces represent the numbers of bacterial genera, replicons or genomes within each category. Percentages of multipartite genomes and corresponding bacterial genera are calculated for each host phylum or class (Proteobacteria).

## 144 **Exploration of the replicon diversity**

145 We explored the differences and similarities of the bacterial replicons with regard to  
146 their IS usage using a data mining and machine learning approach (Methods). The 6096  
147 retained IS clusters were used as distinct variables to ascribe each of the 4928 replicons  
148 with a vector according to its IS usage profile. We transformed these data into bipartite  
149 graphs depending on the number of proteins from the IS clusters coded by each replicon.  
150 Bipartite graphs display both the vectors (replicons) and the variables (protein clusters)  
151 together with their respective connections, and allow the interactive exploration of the  
152 data. The majority of the replicons are interconnected (Figure 5) as testimony of the  
153 shared evolutionary history of their IS sequences. Chromosomes and plasmids form  
154 overall distinct groups and communities with varying degree of connectivity depending  
155 on their functional specificities (Figure 5a) as well as on the bacterial taxonomy of their  
156 hosts (Figure 5c). They nonetheless share many ISs, bearing witness to the continuity of  
157 the genomic material and the extensive exchange of genetic material within bacterial  
158 genomes. The occurrence of poorly IS cluster-connected plasmids within a group of  
159 chromosomes did not consistently reflect a true relationship and rather resulted from  
160 shared connections to a very small number (as low as one) of common ISs. While being  
161 interconnected to both chromosomes and plasmids *via* numerous IS clusters, the SERs  
162 generally stand apart from either these types of replicons and gather at the chromosome-  
163 plasmid interface (Figure 5a,b). Their IS usage is neither chromosome-like nor plasmid-  
164 like, suggesting that they may constitute a separate category of replicons. This is most  
165 tangible in the case of the proteobacterial lineages where SERs occur most frequently  
166 (top of Figure 5b).

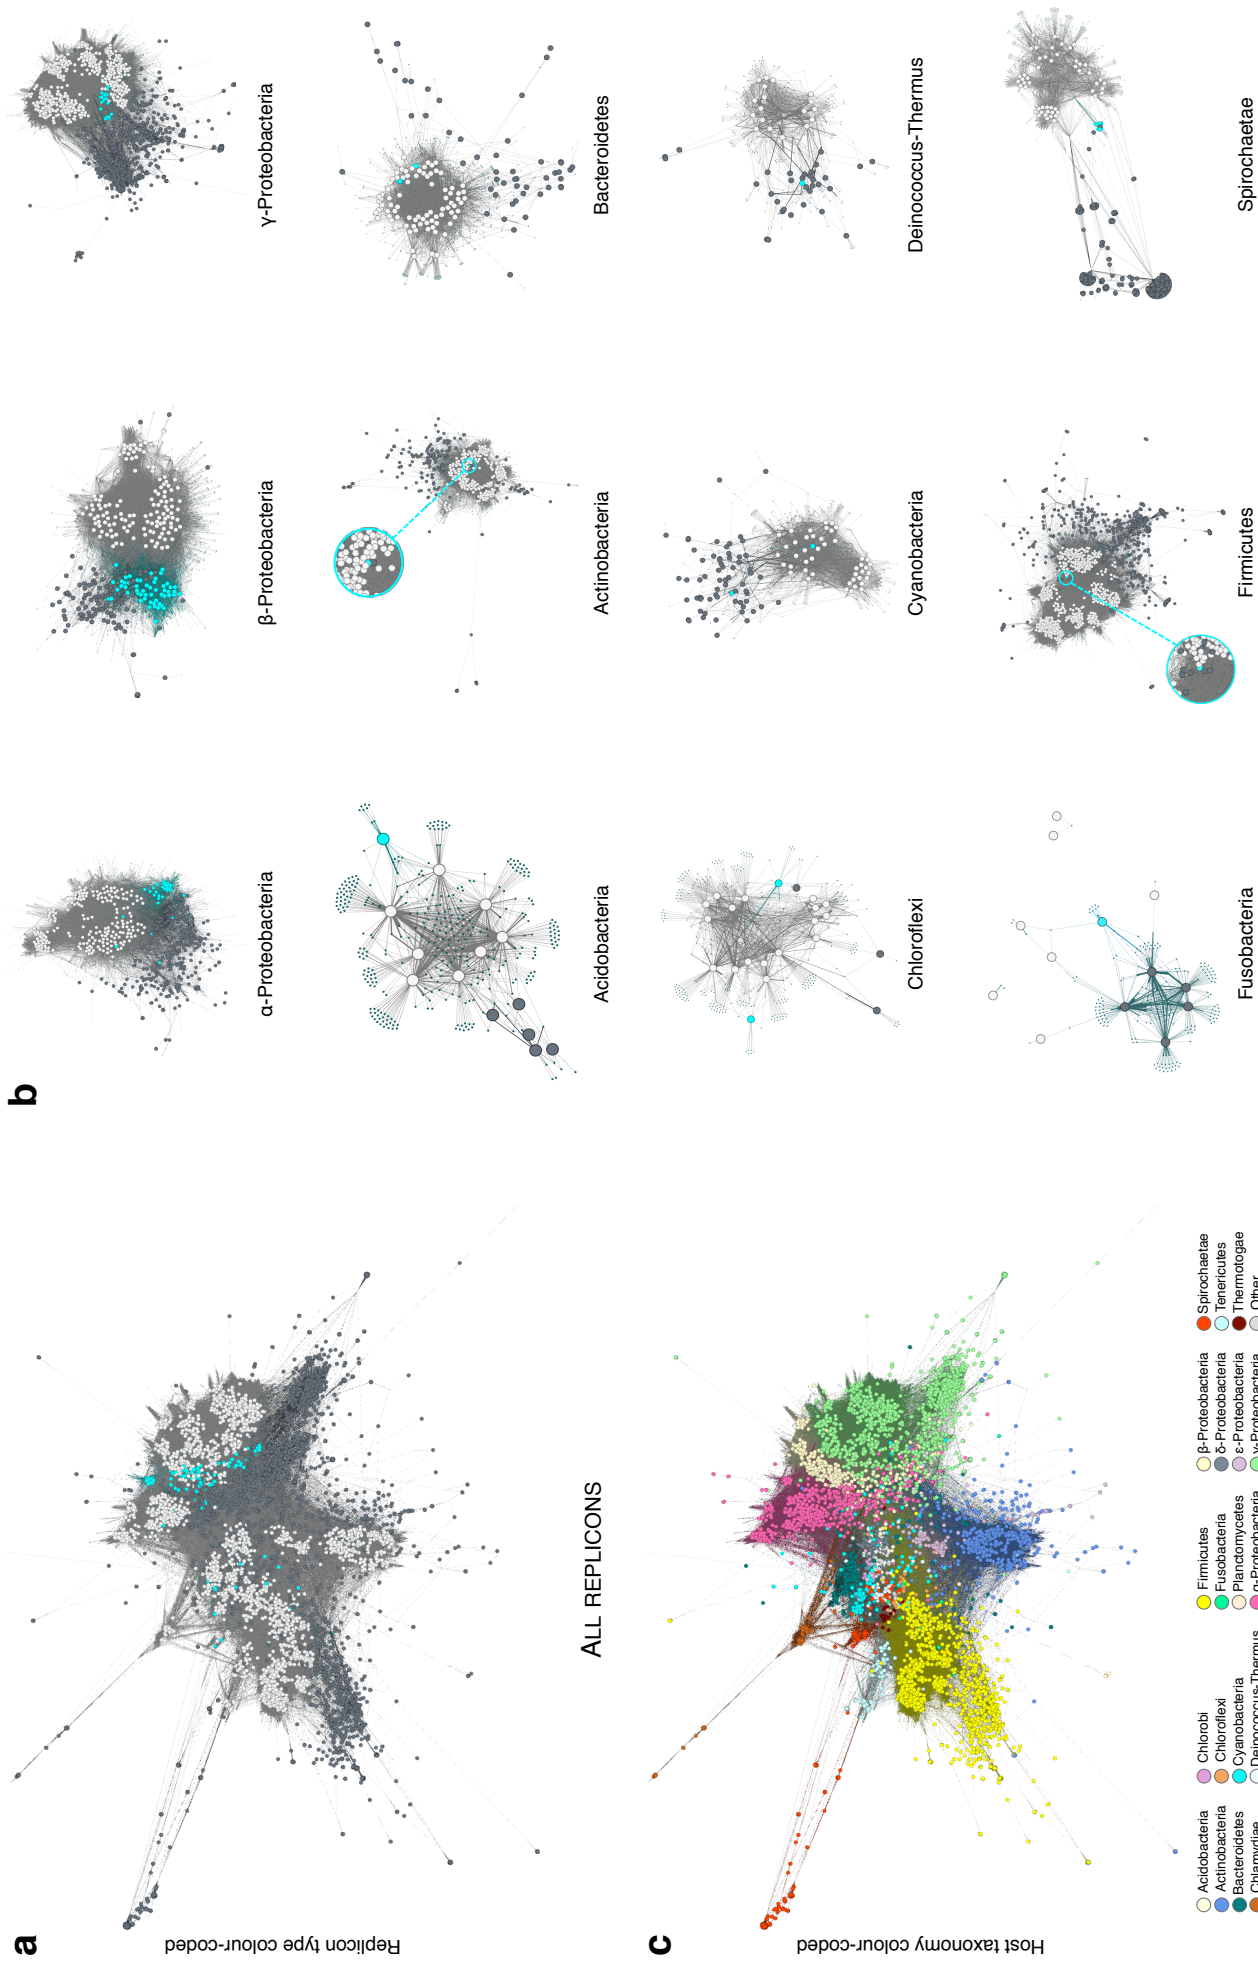

**Figure 5. Visualisation of the replicon IS-based relationships**

Gephi-generated bipartite-graphs for the whole dataset (a and b) or groups of replicons following the host taxonomy (c). Nodes correspond to the replicons (large dots) or the clusters of IS proteins (small dots). Edges linking replicons and protein clusters reflect the presence on a replicon of at least one protein of a protein cluster. Colouring according to replicon type (a and c): chromosomes (white), plasmids (grey), and SERs (blue), or according to host taxonomy (b).



169 All SERs in the  $\beta$ - and  $\gamma$ -Proteobacteria, and most in the  $\alpha$ -Proteobacteria are linked to  
170 remarkable chromosome-type IS clusters, such as AcrA, IciA, FtsE, HN-S and Lrp, as  
171 well as to plasmid-like ParA/ParB, Rep and PSK IS clusters. A similar pattern is  
172 observed for the SERs in actinobacterium *Nocardiopsis dassonvillei*, firmicute  
173 *Butyrivibrio proteoclasticus*, and chloroflexi *Sphaerobacter thermophilus* and  
174 *Thermobaculum terrenum* (Figure 5b). Interestingly, DNA primase DnaG-annotated  
175 clusters connect the SERs present in all but one *Burkholderia* species ( $\beta$ -Proteobacteria)  
176 as well as the chromosomes of all other bacteria. Since the sole exception,  
177 *B. rhizoxinica*, possesses a SER-less reduced genome as an adaptation to intracellular life,  
178 the *Burkholderia* SERs likely originated from a single event prior to the diversification  
179 of the genus, possibly in relation to the speciation event that gave rise to this lineage.  
180 The second SERs harbored by only some *Burkholderia* species exhibit a higher level of  
181 interconnection to plasmids, as do the SERs in  $\alpha$ -proteobacterium *Sphingobium*,  
182 cyanobacterium *Cyanothece* sp. ATCC 51142, *Deinococcus radiodurans* (Deinococcus-  
183 Thermus) and fusobacterium *Ilyobacter polytropus*. This points to an incomplete  
184 stabilization of the SERs into the genome that may reflect a recent, ongoing, event of  
185 integration and/or differing selective pressures at play depending on the bacterial  
186 lineages. At odds with these observations, some SERs group unambiguously with  
187 chromosomes. The SERs in  $\alpha$ -Proteobacteria *Asticcacaulis excentricus* and *Paracoccus*  
188 *denitrificans*, Bacteroidetes *Prevotella intermedia* and *P. melaninogenica*,  
189 acidobacterium *Chloracidobacterium thermophilum*, and cyanobacterium  
190 *Anabaena* sp. 90 bear higher levels of interconnection to chromosomes than to plasmids  
191 or other SERs. Indeed, the SERs in *Prevotella* spp. are hardly linked to plasmids, and  
192 the few plasmid-like IS proteins that *C. thermophilum* SER codes (mostly Rep, Helicase  
193 and PSK), albeit found in plasmids occurring in other phyla, are observed in none of the

194 Acidobacteria plasmids. An extreme situation is met in *Leptospira* spp. (Spirochaetae)  
195 whose SERs are each linked to only three or four (out of a total of six) chromosome-like  
196 IS clusters, always including ParA and ParB. Interestingly, the ParA cluster appears to  
197 be specific to Spirochaetae chromosomes with the notable exception of one plasmid  
198 found in Leptospiraceae *Turneriella parva*.

### 199 **IS-based relationships of the replicons**

200 We submitted the bipartite graph of the whole dataset to a community structure  
201 detection algorithm (INFOMAP) that performs a random walk along the edges  
202 connecting the graph vertices. We expected the replicon communities to be trapped in  
203 high-density regions of the graph. We also performed a dimension reduction by  
204 Principal Component Analysis followed by a hierarchical clustering procedure  
205 (WARD). The clustering solutions (Supplementary tables 2 and 3) were meaningful  
206 (high values reached by the stability criterion scores), and biologically relevant (efficient  
207 separation of the chromosomes from the plasmids; high *homogeneity* values) using  
208 either method (Table 3). In another experiment, we considered each genus as a unique  
209 sample and averaged the variables over the replicons of the different species for each  
210 replicon type. The aim was to control for the disparity in taxon representation of the  
211 replicons. This dataset produced overall similar albeit slightly less stable clusters (lower  
212 *homogeneity* values). Taxonomically homogeneous clusters of chromosomes were best  
213 retrieved using the coupling of dimension reduction and hierarchical clustering with a  
214 large enough number of clusters (*homogeneity* scores up to 0.93). In turn, the  
215 community detection algorithm was more efficient in recovering the underlying  
216 taxonomy of replicons (higher value of *completeness*), and was sole able to identify  
217 small and scattered plasmid clusters (Supplementary tables 2 and 3).

218 **Table 3. Evaluation of the replicon IS-based clusterings**

|                      |                                                    | INDEX <sup>a</sup>  | USING IS PROTEIN SEQUENCES |                     |                                                                 |                                                                 | USING IS FUNCTIONS                                            |                                                               |
|----------------------|----------------------------------------------------|---------------------|----------------------------|---------------------|-----------------------------------------------------------------|-----------------------------------------------------------------|---------------------------------------------------------------|---------------------------------------------------------------|
| CLUSTERING           |                                                    |                     | INFOMAP                    |                     | PCA+ WARD <sup>b</sup>                                          |                                                                 | PCA+ WARD <sup>b</sup>                                        |                                                               |
| PROCEDURE            | Dataset <sup>c</sup>                               |                     | $V^R$                      | $\bar{v}_{genus}^R$ | $V^R$                                                           | $\bar{v}_{genus}^R$                                             | $V_f^R$                                                       | $\bar{v}_{f,genus}^R$                                         |
|                      | Parameters                                         |                     | 500 iterations             |                     | $\left[ \begin{matrix} k = 200 \\ pc = 30 \end{matrix} \right]$ | $\left[ \begin{matrix} k = 200 \\ pc = 30 \end{matrix} \right]$ | $\left[ \begin{matrix} k = 50 \\ pc = 4 \end{matrix} \right]$ | $\left[ \begin{matrix} k = 20 \\ pc = 4 \end{matrix} \right]$ |
|                      | Number of clusters                                 |                     | 223                        | 77                  | 175                                                             | 75                                                              | 49                                                            | 19                                                            |
|                      | PCA explained variance                             |                     |                            |                     | 57%                                                             | 58%                                                             | 87%                                                           | 85%                                                           |
|                      | Stability criterion ( $\Delta^{Kl}$ ) <sup>d</sup> |                     | 0.82                       | 0.76                | 0.85                                                            | 0.74                                                            | 0.80                                                          | 0.71                                                          |
| EVALUATED SEPARATION | Chromosomes vs. Plasmids                           | <i>homogeneity</i>  | 0.82                       | 0.63                | 0.93                                                            | 0.83                                                            | 0.85                                                          | 0.68                                                          |
|                      |                                                    | <i>completeness</i> | 0.15                       | 0.15                | 0.25                                                            | 0.20                                                            | 0.30                                                          | 0.23                                                          |
|                      |                                                    | <i>V-measure</i>    | 0.25                       | 0.24                | 0.43                                                            | 0.32                                                            | 0.44                                                          | 0.35                                                          |
|                      | Chromosomes <i>per</i> host phylum                 | <i>homogeneity</i>  | 0.93                       | 0.69                | 0.93                                                            | 0.80                                                            | 0.50                                                          | 0.44                                                          |
|                      |                                                    | <i>completeness</i> | 0.60                       | 0.61                | 0.35                                                            | 0.40                                                            | 0.27                                                          | 0.33                                                          |
|                      |                                                    | <i>V-measure</i>    | 0.73                       | 0.65                | 0.51                                                            | 0.53                                                            | 0.35                                                          | 0.38                                                          |
|                      | Chromosomes <i>per</i> host class                  | <i>homogeneity</i>  | 0.85                       | 0.64                | 0.93                                                            | 0.80                                                            | 0.47                                                          | 0.37                                                          |
|                      |                                                    | <i>completeness</i> | 0.80                       | 0.82                | 0.16                                                            | 0.58                                                            | 0.36                                                          | 0.41                                                          |
|                      |                                                    | <i>V-measure</i>    | 0.82                       | 0.72                | 0.66                                                            | 0.67                                                            | 0.41                                                          | 0.39                                                          |
|                      | Plasmids <i>per</i> host phylum                    | <i>homogeneity</i>  | 0.88                       | 0.78                | 0.06                                                            | 0.01                                                            | 0.02                                                          | 0.02                                                          |
|                      |                                                    | <i>completeness</i> | 0.33                       | 0.35                | 0.16                                                            | 0.14                                                            | 0.10                                                          | 0.30                                                          |
|                      |                                                    | <i>V-measure</i>    | 0.48                       | 0.48                | 0.08                                                            | 0.02                                                            | 0.03                                                          | 0.03                                                          |
|                      | Plasmids <i>per</i> host class                     | <i>homogeneity</i>  | 0.84                       | 0.74                | 0.07                                                            | 0.02                                                            | 0.03                                                          | 0.02                                                          |
|                      |                                                    | <i>completeness</i> | 0.43                       | 0.51                | 0.28                                                            | 0.36                                                            | 0.25                                                          | 0.28                                                          |
|                      |                                                    | <i>V-measure</i>    | 0.57                       | 0.60                | 0.12                                                            | 0.03                                                            | 0.05                                                          | 0.03                                                          |

219 <sup>a</sup> *V-measure* according to Rosenberg and Hirschberg (2007)

220 <sup>b</sup> *k*: number of input clusters; *pc*: principal components used in WARD

221 <sup>c</sup>  $V_f^R$ : Ensemble of all IS function-based replicon vectors ( $v_f^r$ );  $\bar{v}_{f,genus}^R$ : Ensemble of IS function-based genus-normalized replicon vectors ( $v_{f,genus}^r$ )

223 <sup>d</sup> Stability criterion according to Hennig (2007)

224 The plasmid clusters obtained using PCA+WARD lacked taxonomical patterning and,

225 although highly stable, only reflected the small Euclidian distances existing among the

226 plasmid replicons (e.g., one cluster of 2656 plasmids had a stability score of 0.975). The

227 clusters obtained with INFOMAP mirrored the taxonomical structure of the data,  
 228 suggesting that the taxonomic signal, expected to be associated to the chromosomes, is  
 229 preserved among the IS protein families functionally specifying the plasmids. The  
 230 presence of a majority of the SERs amongst the chromosome clusters generated by  
 231 INFOMAP confirmed the affinities between these two genomic elements and the clear  
 232 individuation of the SERs from the plasmids. However, the larger number of  
 233 chromosomal ISs often caused the PCA+WARD approach to place SERs into plasmid  
 234 clusters. The SERs in *Butyrivibrio*, *Deinococcus*, *Leptospira* and *Rhodobacter* spp.  
 235 grouped consistently with plasmids while the SERs in *Vibrionaceae* and *Brucellaceae*  
 236 formed specific clusters (Table 4). Burkholderiales and *Agrobacterium* SERs, whose  
 237 homogenous clusters tended to be unstable, exhibited a higher affinity to plasmids  
 238 overall. The SERs of *Asticcacaulis*, *Paracoccus* and *Prevotella* spp. associated stably  
 239 with chromosomes using the two clustering methods (Table 4a,b) and possess IS profiles  
 240 that set them apart from both the plasmids and the other SERs.

241 **Table 4. IS protein cluster-based unsupervised classification of SERs**

242 a. INFOMAP clustering solution

| Bacterial genus            | $C^a$ | CHR% | SER% | PLD% | $wBHI^b$ | $\overline{\Delta C}^c$ | $\overline{\Delta r}^d$ |
|----------------------------|-------|------|------|------|----------|-------------------------|-------------------------|
| <i>Agrobacterium</i>       | 3     | 38   | 35   | 27   | 0.90     | 0.47                    | 0.61                    |
| <i>Aliivibrio</i>          | 1     | 0    | 100  | 0    | 1.00     | 0.95                    | 1.00                    |
| <i>Anabaena</i>            | 1     | 98   | 1    | 1    | 1.00     | 0.90                    | 1.00                    |
| <i>Asticcacaulis</i>       | 1     | 96   | 1    | 3    | 1.00     | 0.97                    | 1.00                    |
| <i>Brucella</i>            | 1     | 0    | 95   | 5    | 1.00     | 0.87                    | 1.00                    |
| <i>Burkholderia</i>        | 2     | 64   | 17   | 19   | 0.99     | 0.77                    | 0.99                    |
| <i>Butyrivibrio</i>        | 1     | 0    | 50   | 50   | 1.00     | 0.83                    | 1.00                    |
| <i>Chloracidobacterium</i> | 1     | 91   | <1   | 9    | 0.82     | 0.86                    | 0.00                    |
| <i>Cupriavidus</i>         | 1     | 73   | 18   | 9    | 0.99     | 0.72                    | 1.00                    |
| <i>Cyanothece</i>          | 1     | 0    | 6    | 94   | 0.89     | 0.61                    | 0.33                    |
| <i>Deinococcus</i>         | 1     | 0    | 4    | 96   | 0.71     | 0.61                    | 1.00                    |
| <i>Ilyobacter</i>          | 1     | 91   | <1   | 9    | 0.82     | 0.86                    | 0.25                    |
| <i>Leptospira</i>          | 1     | 0    | 88   | 12   | 1.00     | 1.00                    | 1.00                    |

|                                |   |    |     |    |      |      |                            |
|--------------------------------|---|----|-----|----|------|------|----------------------------|
| <i>Nocardiopsis</i>            | 1 | 91 | <1  | 9  | 0.97 | 0.97 | 1.00                       |
| <i>Ochrobactrum</i>            | 1 | 0  | 95  | 5  | 1.00 | 0.87 | <i>n.a.n.</i> <sup>e</sup> |
| <i>Paracoccus</i>              | 1 | 96 | 1   | 3  | 1.00 | 0.97 | 1.00                       |
| <i>Photobacterium</i>          | 1 | 96 | 1   | 3  | 0.99 | 0.79 | 1.00                       |
| <i>Prevotella</i>              | 1 | 96 | 2   | 2  | 0.95 | 0.92 | 1.00                       |
| <i>Pseudoalteromonas</i>       | 1 | 96 | 1   | 3  | 0.99 | 0.79 | 0.56                       |
| <i>Ralstonia</i>               | 1 | 73 | 18  | 9  | 0.99 | 0.72 | 1.00                       |
| <i>Rhodobacter</i>             | 1 | 0  | 40  | 60 | 1.00 | 0.71 | 1.00                       |
| <i>Ensifer (Sinorhizobium)</i> | 2 | 0  | 2   | 98 | 0.96 | 0.65 | 0.67                       |
| <i>Sphaerobacter</i>           | 1 | 0  | 50  | 50 | 1.00 | 1.00 | 1.00                       |
| <i>Sphingobium</i>             | 2 | 77 | 1   | 22 | 0.95 | 0.90 | 0.50                       |
| <i>Thermobaculum</i>           | 1 | 91 | <1  | 9  | 0.82 | 0.86 | 1.00                       |
| <i>Variovorax</i>              | 1 | 73 | 18  | 9  | 0.99 | 0.72 | 0.90                       |
| <i>Vibrio</i>                  | 1 | 0  | 100 | 0  | 1.00 | 0.95 | 0.89                       |

- 243 <sup>a</sup> number of clusters containing SERs of a given bacterial genus  
244 <sup>b</sup> weighted biological homogeneity index value for the phylum of the replicons in the clusters  
245 <sup>c</sup> mean value of the cluster stability estimator, weighted by the cluster sizes  
246 <sup>d</sup> mean value of the SER stability estimator for a given bacterial genus  
247 <sup>e</sup> “*n.a.n.*”, standing for “not a number”, indicates that the replicon appeared in none of the bootstrap replications  
248 performed in the clustering procedure

#### 249 b. PCA+WARD clustering solution

| Bacterial genus                | $C^a$ | CHR% | SER% | PLD% | $wBHI^b$ | $\overline{\Delta^c}$ | $\overline{\Delta^d}$ |
|--------------------------------|-------|------|------|------|----------|-----------------------|-----------------------|
| <i>Agrobacterium</i>           | 2     | 0    | 29   | 71   | 0.94     | 0.76                  | 1.00                  |
| <i>Aliivibrio</i>              | 2     | 0    | 56   | 44   | 1.00     | 0.60                  | 0.33                  |
| <i>Anabaena</i>                | 1     | 98   | 2    | 0    | 0.97     | 0.84                  | 0.00                  |
| <i>Asticcacaulis</i>           | 1     | 88   | 8    | 4    | 1.00     | 0.88                  | 1.00                  |
| <i>Brucella</i>                | 2     | 0    | 33   | 67   | 0.96     | 0.53                  | 0.97                  |
| <i>Burkholderia</i>            | 7     | 0    | 79   | 21   | 0.97     | 0.69                  | 0.84                  |
| <i>Butyrivibrio</i>            | 1     | <1   | 1    | 99   | 0.27     | 0.98                  | 1.00                  |
| <i>Chloracidobacterium</i>     | 1     | <1   | 1    | 99   | 0.27     | 0.98                  | 1.00                  |
| <i>Cupriavidus</i>             | 2     | 0    | 92   | 8    | 1.00     | 0.69                  | 0.92                  |
| <i>Cyanothece</i>              | 1     | <1   | 1    | 99   | 0.27     | 0.98                  | 1.00                  |
| <i>Deinococcus</i>             | 1     | <1   | 1    | 99   | 0.27     | 0.98                  | 1.00                  |
| <i>Ilyobacter</i>              | 1     | <1   | 1    | 99   | 0.27     | 0.98                  | 1.00                  |
| <i>Leptospira</i>              | 1     | <1   | 1    | 99   | 0.27     | 0.98                  | 1.00                  |
| <i>Nocardiopsis</i>            | 1     | 0    | 2    | 98   | 0.58     | 0.40                  | 1.00                  |
| <i>Ochrobactrum</i>            | 1     | 0    | 100  | 0    | 1.00     | 1.00                  | 1.00                  |
| <i>Paracoccus</i>              | 1     | 88   | 8    | 4    | 1.00     | 0.88                  | 1.00                  |
| <i>Photobacterium</i>          | 1     | 0    | 100  | 0    | 1.00     | 0.55                  | 1.00                  |
| <i>Prevotella</i>              | 2     | 95   | 5    | 0    | 1.00     | 0.73                  | 0.50                  |
| <i>Pseudoalteromonas</i>       | 2     | <1   | 1    | 99   | 0.28     | 0.82                  | 0.83                  |
| <i>Ralstonia</i>               | 1     | 0    | 68   | 32   | 1.00     | 0.81                  | 0.83                  |
| <i>Rhodobacter</i>             | 2     | 0    | 6    | 94   | 0.65     | 0.43                  | 0.58                  |
| <i>Ensifer (Sinorhizobium)</i> | 2     | 0    | 21   | 79   | 0.94     | 0.46                  | 0.25                  |
| <i>Sphaerobacter</i>           | 1     | 0    | 20   | 80   | 0.93     | 0.52                  | 0.50                  |

|                      |   |    |    |    |      |      |      |
|----------------------|---|----|----|----|------|------|------|
| <i>Sphingobium</i>   | 1 | 0  | 39 | 61 | 1.00 | 0.66 | 0.83 |
| <i>Thermobaculum</i> | 1 | <1 | 1  | 99 | 0.27 | 0.98 | 1.00 |
| <i>Variovorax</i>    | 1 | 0  | 67 | 33 | 1.00 | 0.48 | 0.00 |
| <i>Vibrio</i>        | 2 | 0  | 56 | 44 | 1.00 | 0.60 | 0.79 |

- 250 <sup>a</sup> number of clusters containing SERs of a given bacterial genus  
251 <sup>b</sup> weighted biological homogeneity index value for the phylum of the replicons in the clusters  
252 <sup>c</sup> mean value of the cluster stability estimator, weighted by the cluster sizes  
253 <sup>d</sup> mean value of the SER stability estimator for a given bacterial genus

254 We reached similar conclusions when performing a PCA+WARD clustering using the  
255 117 functional annotations of the IS protein clusters rather than the IS clusters  
256 themselves (Tables 3 and 5; Supplementary table 4).

257 **Table 5. Function-based unsupervised classification of SERs using PCA+WARD**

| Bacterial genus                | $C^a$ | CHR% | SER% | PLD% | $wBHI^b$ | $\overline{\Delta}^c$ | $\overline{\Delta}^d$ |
|--------------------------------|-------|------|------|------|----------|-----------------------|-----------------------|
| <i>Agrobacterium</i>           | 3     | 64   | 21   | 15   | 0.86     | 0.60                  | 0.81                  |
| <i>Aliivibrio</i>              | 1     | 0    | 70   | 30   | 1.00     | 0.70                  | 0.67                  |
| <i>Anabaena</i>                | 1     | 77   | 4    | 19   | 0.21     | 0.64                  | 1.00                  |
| <i>Asticcacaulis</i>           | 1     | 99   | 1    | 0    | 0.51     | 0.60                  | 1.00                  |
| <i>Brucella</i>                | 1     | 43   | 32   | 25   | 0.75     | 0.80                  | 1.00                  |
| <i>Burkholderia</i>            | 6     | 31   | 42   | 27   | 0.92     | 0.68                  | 0.81                  |
| <i>Butyrivibrio</i>            | 1     | 77   | 4    | 19   | 0.21     | 0.64                  | 1.00                  |
| <i>Chloracidobacterium</i>     | 1     | 1    | <1   | 99   | 0.29     | 0.98                  | 0.00                  |
| <i>Cupriavidus</i>             | 1     | 5    | 95   | 0    | 1.00     | 0.66                  | 0.66                  |
| <i>Cyanothece</i>              | 1     | 1    | <1   | 99   | 0.29     | 0.98                  | 1.00                  |
| <i>Deinococcus</i>             | 1     | 1    | <1   | 99   | 0.29     | 0.98                  | 1.00                  |
| <i>Ilyobacter</i>              | 1     | 77   | 4    | 19   | 0.21     | 0.64                  | 1.00                  |
| <i>Leptospira</i>              | 1     | 1    | <1   | 99   | 0.29     | 0.98                  | 1.00                  |
| <i>Nocardiopsis</i>            | 1     | 77   | 4    | 19   | 0.21     | 0.64                  | 1.00                  |
| <i>Ochrobactrum</i>            | 1     | 90   | 8    | 2    | 1.00     | 0.40                  | 0.73                  |
| <i>Paracoccus</i>              | 1     | 92   | 5    | 3    | 0.89     | 0.32                  | 0.53                  |
| <i>Photobacterium</i>          | 1     | 0    | 70   | 30   | 1.00     | 0.70                  | 0.36                  |
| <i>Prevotella</i>              | 2     | 86   | 3    | 11   | 0.34     | 0.62                  | 0.50                  |
| <i>Pseudoalteromonas</i>       | 1     | 77   | 4    | 19   | 0.21     | 0.64                  | 0.29                  |
| <i>Ralstonia</i>               | 1     | 0    | 70   | 30   | 1.00     | 0.70                  | 0.22                  |
| <i>Rhodobacter</i>             | 2     | 27   | 32   | 41   | 0.84     | 0.73                  | 0.83                  |
| <i>Ensifer (Sinorhizobium)</i> | 2     | 25   | 48   | 27   | 0.86     | 0.76                  | 0.63                  |
| <i>Sphaerobacter</i>           | 1     | 100  | <1   | 0    | 0.35     | 0.60                  | 1.00                  |
| <i>Sphingobium</i>             | 2     | 62   | 17   | 21   | 0.34     | 0.64                  | 0.86                  |
| <i>Thermobaculum</i>           | 1     | 77   | 4    | 19   | 0.21     | 0.64                  | 1.00                  |
| <i>Variovorax</i>              | 1     | 0    | 70   | 30   | 1.00     | 0.70                  | 1.00                  |

*Vibrio* 4 31 37 32 0.97 0.57 0.92

258 <sup>a</sup> number of clusters containing SERs of a given bacterial genus  
259 <sup>b</sup> weighted biological homogeneity index value for the phylum of the replicons in the clusters  
260 <sup>c</sup> mean value of the cluster stability estimator, weighted by the sizes of the clusters  
261 <sup>d</sup> mean value of the SER stability estimator for a given bacterial genus

262 Remarkably, in this latter analysis, the chromosomes in the multipartite genomes of  
263 *Prevotella intermedia* and *P. melaninogenica* were more similar to plasmids than to  
264 other groups of chromosomes and to single chromosomes in other *Prevotella* species  
265 (*P. denticola* and *P. ruminicola*).

### 266 **SER-specifying IS functions**

267 Next, we searched which of the IS functions are specific to the SERs. We performed  
268 several logistic regression analyses to identify over- or under-represented ISs and to  
269 assess their respective relevance to each class of replicons. Because of their  
270 comparatively small number, all SERs were assembled into a single group despite their  
271 disparity. A hundred and one IS functionalities (96% of KEGG-annotated chromosome-  
272 like functions and 72% of ACLAME-annotated plasmid-like functions) were  
273 significantly enriched in one replicon category over the other (Table 6). The large  
274 majority of the IS functions differentiates the chromosomes from the plasmids. The  
275 latter are only determined by ISs corresponding to ACLAME annotations Rep, Rop and  
276 TrfA, involved in initiation of plasmid replication, and ParA and ParB, dedicated to  
277 plasmid partition. Some KEGG-annotated functions, *e.g.*, DnaA, DnaB or FtsZ, appear  
278 to be more highly specific to chromosomes (higher *OR* values) than others such as  
279 DnaC, FtsE or H-NS (lower *OR* values). Strikingly, very few functions distinguish  
280 significantly the chromosomes from the SERs, by contrast with plasmids.

281

**Table 6. IS usage comparison between replicon categories**

282

Between classes of replicons logistic regressions for each IS function. Model significance:  $0 < P\_value < 0.01$ :

283

significant;  $0.01 < P\_value < 0.05$ : poorly significant;  $0.05 < P\_value$ : non significant (not shown). Odd-ratio (*OR*)

284

favouring the first class:  $10^0 \leq OR$ , or the second class:  $OR < 10^0$ . IS functions biased to the same order of magnitude

285

in chromosomes and SERs when compared to plasmids are highlighted (blue).

| IS function   | Chromosomes vs. Plasmids                 |             | Chromosomes vs. SERs                     |            | SERs vs. Plasmids                        |             |
|---------------|------------------------------------------|-------------|------------------------------------------|------------|------------------------------------------|-------------|
|               | <i>P</i> _value                          | <i>OR</i>   | <i>P</i> _value                          | <i>OR</i>  | <i>P</i> _value                          | <i>OR</i>   |
| CbpA          | $8.20 \times 10^{-27}$                   | 2,608.4     | $9.90 \times 10^{-13}$                   | 22.8       | $5.60 \times 10^{-07}$                   | 36.1        |
| Dam           | $6.90 \times 10^{-16}$                   | 16.7        | $3.60 \times 10^{-02}$                   | 2.0        | $2.40 \times 10^{-02}$                   | 4.3         |
| DiaA          | $1.50 \times 10^{-15}$                   | 81.9        | $1.20 \times 10^{-03}$                   | 38.4       |                                          |             |
| DnaA          | $3.00 \times 10^{-44}$                   | 2,118.9     | $1.10 \times 10^{-19}$                   | 239.6      | $3.50 \times 10^{-03}$                   | 8.3         |
| DnaB          | $1.10 \times 10^{-43}$                   | 1,992.9     | $5.10 \times 10^{-19}$                   | 429.4      | $8.20 \times 10^{-03}$                   | 3.7         |
| DnaB2         | $6.70 \times 10^{-03}$                   | 12.6        |                                          |            |                                          |             |
| <b>DnaC</b>   | <b><math>6.00 \times 10^{-12}</math></b> | <b>2.6</b>  |                                          |            | <b><math>4.60 \times 10^{-02}</math></b> | <b>1.5</b>  |
| DnaG          | $2.10 \times 10^{-50}$                   | 1,861.5     | $1.90 \times 10^{-21}$                   | 205.3      | $2.50 \times 10^{-03}$                   | 4.5         |
| DnaI          | $5.20 \times 10^{-03}$                   | 18.0        |                                          |            |                                          |             |
| Dps           | $9.10 \times 10^{-21}$                   | 65.3        | $3.50 \times 10^{-05}$                   | 8.4        | $8.70 \times 10^{-03}$                   | 6.7         |
| Fis           | $5.80 \times 10^{-07}$                   | 180.9       | $3.30 \times 10^{-03}$                   | 7.9        | $1.40 \times 10^{-02}$                   | 25.1        |
| Hda           | $7.30 \times 10^{-07}$                   | 149.1       | $5.30 \times 10^{-03}$                   | 7.9        | $1.90 \times 10^{-02}$                   | 18.0        |
| Hfq           | $1.40 \times 10^{-12}$                   | 121.7       | $3.00 \times 10^{-04}$                   | 6.9        | $8.10 \times 10^{-04}$                   | 19.3        |
| <b>H-NS</b>   | <b><math>1.10 \times 10^{-05}</math></b> | <b>2.8</b>  |                                          |            | <b><math>3.80 \times 10^{-04}</math></b> | <b>2.8</b>  |
| HupA          | $2.70 \times 10^{-04}$                   | 15.1        |                                          |            |                                          |             |
| HupB          | $1.20 \times 10^{-53}$                   | 97.6        | $2.30 \times 10^{-08}$                   | 6.7        | $2.40 \times 10^{-07}$                   | 11.6        |
| <b>IciA</b>   | <b><math>7.10 \times 10^{-20}</math></b> | <b>3.2</b>  |                                          |            | <b><math>4.50 \times 10^{-07}</math></b> | <b>1.8</b>  |
| IhfA, HimA    | $1.70 \times 10^{-12}$                   | 63.8        | $1.40 \times 10^{-03}$                   | 10.5       | $4.90 \times 10^{-02}$                   | 6.9         |
| IhfB, HimD    | $1.20 \times 10^{-14}$                   | 68.4        | $4.90 \times 10^{-04}$                   | 8.4        | $8.40 \times 10^{-03}$                   | 9.9         |
| Lrp           | $1.60 \times 10^{-19}$                   | 8.4         |                                          |            | $5.40 \times 10^{-11}$                   | 8.1         |
| <b>Rob</b>    | <b><math>6.30 \times 10^{-19}</math></b> | <b>5.3</b>  |                                          |            | <b><math>3.40 \times 10^{-08}</math></b> | <b>4.2</b>  |
| SeqA          | $1.60 \times 10^{-03}$                   | 25.9        |                                          |            |                                          |             |
| ssb           | $5.90 \times 10^{-41}$                   | 298.3       | $5.00 \times 10^{-18}$                   | 160.6      |                                          |             |
| <b>Fic</b>    | <b><math>3.10 \times 10^{-09}</math></b> | <b>10.3</b> |                                          |            | <b><math>8.60 \times 10^{-03}</math></b> | <b>7.2</b>  |
| GidA, MmG,    | $5.20 \times 10^{-13}$                   | 1,477.2     | $2.90 \times 10^{-08}$                   | 110.6      | $4.30 \times 10^{-02}$                   | 18.2        |
| GidB, RsmG    | $6.70 \times 10^{-17}$                   | 6,059.9     | $2.20 \times 10^{-15}$                   | 252.5      | $9.00 \times 10^{-03}$                   | 32.2        |
| MreB          | $1.30 \times 10^{-21}$                   | 1,598.2     | $3.90 \times 10^{-12}$                   | 40.1       | $1.40 \times 10^{-05}$                   | 24.1        |
| MreC          | $2.90 \times 10^{-11}$                   | 1,311.2     | $1.30 \times 10^{-08}$                   | 46.3       | $8.90 \times 10^{-03}$                   | 32.8        |
| MreD          | $1.80 \times 10^{-08}$                   | 459.2       | $6.80 \times 10^{-05}$                   | 19.8       | $1.90 \times 10^{-02}$                   | 18.2        |
| Mrp           | $6.60 \times 10^{-17}$                   | 2,599.3     | $1.30 \times 10^{-14}$                   | 35.0       | $2.50 \times 10^{-05}$                   | 86.2        |
| <b>MukB</b>   | <b><math>2.30 \times 10^{-03}</math></b> | <b>27.4</b> |                                          |            | <b><math>1.90 \times 10^{-02}</math></b> | <b>18.2</b> |
| <b>MukE</b>   | <b><math>3.10 \times 10^{-03}</math></b> | <b>21.0</b> |                                          |            | <b><math>1.90 \times 10^{-02}</math></b> | <b>18.2</b> |
| <b>MukF</b>   | <b><math>3.70 \times 10^{-03}</math></b> | <b>19.6</b> |                                          |            | <b><math>1.90 \times 10^{-02}</math></b> | <b>18.2</b> |
| ParA, Soj     | $2.70 \times 10^{-38}$                   | 9.9         | $9.00 \times 10^{-06}$                   | 2.6        | $8.40 \times 10^{-06}$                   | 3.8         |
| ParB, SpoIJ   | $2.50 \times 10^{-44}$                   | 13.7        | $3.00 \times 10^{-03}$                   | 2.1        | $2.30 \times 10^{-06}$                   | 4.1         |
| ParC          | $3.00 \times 10^{-27}$                   | 4,149.3     | $3.00 \times 10^{-16}$                   | 134.0      | $4.60 \times 10^{-04}$                   | 12.3        |
| ParE          | $7.30 \times 10^{-26}$                   | 5,842.4     | $5.70 \times 10^{-15}$                   | 350.1      | $2.40 \times 10^{-04}$                   | 15.8        |
| RodA, MrdB    | $2.80 \times 10^{-12}$                   | 1,233.1     | $9.70 \times 10^{-10}$                   | 33.0       | $2.60 \times 10^{-03}$                   | 55.3        |
| TtmFO, Gid    | $1.50 \times 10^{-06}$                   | 182.5       | $4.40 \times 10^{-03}$                   | 8.3        | $1.90 \times 10^{-02}$                   | 18.0        |
| XerC          | $1.70 \times 10^{-43}$                   | 55.0        | $3.10 \times 10^{-08}$                   | 8.8        | $1.80 \times 10^{-04}$                   | 6.7         |
| XerD          | $1.30 \times 10^{-38}$                   | 26.6        | $4.10 \times 10^{-08}$                   | 3.4        | $2.50 \times 10^{-06}$                   | 6.2         |
| ScpA          | $1.40 \times 10^{-11}$                   | 789.4       | $5.70 \times 10^{-07}$                   | 42.9       | $2.10 \times 10^{-02}$                   | 16.6        |
| ScpB          | $7.50 \times 10^{-32}$                   | 102.5       | $1.80 \times 10^{-07}$                   | 25.8       |                                          |             |
| ScpF          | $1.80 \times 10^{-07}$                   | 68.8        | $1.40 \times 10^{-02}$                   | 12.3       |                                          |             |
| SlmA, Ttk     | $3.80 \times 10^{-09}$                   | 52.3        | $1.20 \times 10^{-02}$                   | 4.6        | $1.50 \times 10^{-02}$                   | 7.5         |
| Smc           | $1.60 \times 10^{-08}$                   | 3,090.5     | $1.40 \times 10^{-05}$                   | 131.9      |                                          |             |
| <b>SulA</b>   | <b><math>3.30 \times 10^{-06}</math></b> | <b>17.5</b> |                                          |            | <b><math>1.50 \times 10^{-02}</math></b> | <b>10.7</b> |
| <b>AcrA</b>   | <b><math>6.60 \times 10^{-19}</math></b> | <b>2.8</b>  | <b><math>1.70 \times 10^{-02}</math></b> | <b>1.1</b> | <b><math>5.30 \times 10^{-10}</math></b> | <b>2.7</b>  |
| AmiA, AmiB,   | $6.40 \times 10^{-36}$                   | 46.4        | $2.90 \times 10^{-10}$                   | 8.9        | $4.60 \times 10^{-03}$                   | 3.0         |
| DiviC, DivA   | $4.90 \times 10^{-05}$                   | 90.5        | $4.70 \times 10^{-02}$                   | 8.1        |                                          |             |
| DivIVA        | $4.10 \times 10^{-06}$                   | 128.0       | $1.10 \times 10^{-02}$                   | 13.4       |                                          |             |
| EzrA          | $1.00 \times 10^{-02}$                   | 13.7        |                                          |            |                                          |             |
| FtsA          | $9.50 \times 10^{-12}$                   | 742.7       | $2.20 \times 10^{-08}$                   | 24.6       | $2.50 \times 10^{-03}$                   | 41.7        |
| FtsB          | $1.10 \times 10^{-06}$                   | 167.2       | $5.40 \times 10^{-03}$                   | 16.1       |                                          |             |
| <b>FtsE</b>   | <b><math>4.20 \times 10^{-24}</math></b> | <b>2.3</b>  | <b><math>1.30 \times 10^{-06}</math></b> | <b>1.1</b> | <b><math>4.00 \times 10^{-11}</math></b> | <b>1.9</b>  |
| FtsI          | $9.80 \times 10^{-09}$                   | 47.0        | $7.00 \times 10^{-16}$                   | 3.9        | $2.20 \times 10^{-07}$                   | 76.7        |
| FtsK, SpoIIIE | $2.80 \times 10^{-37}$                   | 76.9        | $2.70 \times 10^{-08}$                   | 15.8       | $1.40 \times 10^{-02}$                   | 4.2         |
| FtsL          | $1.20 \times 10^{-05}$                   | 91.5        | $2.70 \times 10^{-02}$                   | 9.8        |                                          |             |
| FtsN          | $1.60 \times 10^{-04}$                   | 53.0        |                                          |            |                                          |             |
| FtsQ          | $1.70 \times 10^{-15}$                   | 2,135.0     | $1.30 \times 10^{-11}$                   | 99.3       | $9.00 \times 10^{-03}$                   | 28.8        |
| FtsW, SpoVE   | $5.70 \times 10^{-16}$                   | 4,266.4     | $4.40 \times 10^{-16}$                   | 87.7       | $8.20 \times 10^{-04}$                   | 55.0        |
| FtsX          | $9.30 \times 10^{-12}$                   | 972.9       | $1.30 \times 10^{-08}$                   | 13.8       | $4.80 \times 10^{-04}$                   | 146.2       |
| FtsZ          | $3.10 \times 10^{-31}$                   | 2,747.0     | $1.20 \times 10^{-19}$                   | 101.6      | $9.70 \times 10^{-04}$                   | 16.5        |
| MinC          | $4.40 \times 10^{-09}$                   | 172.3       | $1.20 \times 10^{-02}$                   | 3.0        | $5.80 \times 10^{-05}$                   | 76.8        |
| MinD          | $3.10 \times 10^{-19}$                   | 42.8        | $1.60 \times 10^{-04}$                   | 2.3        | $5.40 \times 10^{-11}$                   | 81.5        |
| MinE          | $9.00 \times 10^{-09}$                   | 152.9       | $3.10 \times 10^{-02}$                   | 2.6        | $5.90 \times 10^{-05}$                   | 75.2        |
| ZapA          | $8.20 \times 10^{-09}$                   | 602.8       | $7.40 \times 10^{-06}$                   | 17.3       | $7.30 \times 10^{-03}$                   | 56.1        |
| ZipA          | $7.90 \times 10^{-05}$                   | 66.0        |                                          |            |                                          |             |



| ACLAME Families (plasmid-like) |                      |                        |       |                        |      |                        |      |
|--------------------------------|----------------------|------------------------|-------|------------------------|------|------------------------|------|
| REPLICATION                    | CdsD                 |                        |       | $4.40 \times 10^{-02}$ | 0.1  |                        |      |
|                                | DNA helicase         | $5.80 \times 10^{-21}$ | 33.6  | $2.70 \times 10^{-04}$ | 4.1  | $1.30 \times 10^{-04}$ | 9.8  |
|                                | Helicase-I           | $1.60 \times 10^{-27}$ | 71.1  | $1.90 \times 10^{-13}$ | 20.0 | $1.10 \times 10^{-04}$ | 4.6  |
|                                | DNA repair           | $2.20 \times 10^{-04}$ | 34.0  |                        |      | $5.70 \times 10^{-04}$ | 43.6 |
|                                | primase, LtrC        | $3.10 \times 10^{-02}$ | 1.8   |                        |      |                        |      |
|                                | RepA                 | $5.90 \times 10^{-03}$ | 0.7   |                        |      |                        |      |
|                                | RepAEB               | $1.70 \times 10^{-16}$ | 0.0   | $1.90 \times 10^{-04}$ | 0.1  |                        |      |
|                                | RepC                 |                        |       |                        |      | $9.60 \times 10^{-03}$ | 2.7  |
|                                | RepCJE               |                        |       | $4.40 \times 10^{-02}$ | 0.1  |                        |      |
|                                | RepRSE               | $1.30 \times 10^{-02}$ | 0.0   | $4.90 \times 10^{-02}$ | 0.1  |                        |      |
|                                | RNA polymerase       | $3.20 \times 10^{-02}$ | 6.3   |                        |      |                        |      |
|                                | Rop                  | $3.20 \times 10^{-02}$ | 0.0   | $4.40 \times 10^{-02}$ | 0.1  |                        |      |
|                                | RuvB                 | $1.20 \times 10^{-08}$ | 433.0 | $5.70 \times 10^{-08}$ | 17.7 | $1.40 \times 10^{-05}$ | 37.8 |
|                                | TrfA                 | $1.40 \times 10^{-02}$ | 0.3   |                        |      |                        |      |
| PARTITION                      | ATPase, TyrK,        | $2.20 \times 10^{-20}$ | 19.4  |                        |      | $8.50 \times 10^{-07}$ | 9.3  |
|                                | CopG                 |                        |       | $2.70 \times 10^{-02}$ | 0.2  | $4.60 \times 10^{-03}$ | 23.1 |
|                                | DNA-binding protein  |                        |       | $4.40 \times 10^{-02}$ | 0.1  |                        |      |
|                                | FtsK, SpoIIE         | $1.90 \times 10^{-07}$ | 6.0   |                        |      | $9.90 \times 10^{-05}$ | 9.8  |
|                                | ParA, ParM           | $1.50 \times 10^{-10}$ | 0.4   | $4.00 \times 10^{-06}$ | 0.3  |                        |      |
|                                | ParB                 | $5.70 \times 10^{-12}$ | 0.1   | $1.40 \times 10^{-05}$ | 0.2  |                        |      |
|                                | serine recombinase   | $2.50 \times 10^{-06}$ | 1.4   | $1.50 \times 10^{-03}$ | 2.9  | $1.80 \times 10^{-02}$ | 0.4  |
|                                | tyrosine recombinase | $3.40 \times 10^{-04}$ | 3.3   |                        |      | $7.40 \times 10^{-04}$ | 8.7  |
|                                | Xer-like Tyrosine    | $7.60 \times 10^{-11}$ | 2.0   |                        |      | $6.30 \times 10^{-03}$ | 1.6  |
|                                | Ccd (PSK)            | $4.60 \times 10^{-02}$ | 3.9   |                        |      |                        |      |
|                                | HicAB (PSK)          | $4.30 \times 10^{-05}$ | 25.2  |                        |      | $4.80 \times 10^{-03}$ | 15.1 |
|                                | HigBA (PSK)          | $3.30 \times 10^{-15}$ | 3.4   | $2.40 \times 10^{-02}$ | 1.5  | $1.20 \times 10^{-03}$ | 2.5  |
|                                | MazEF (PSK)          | $1.20 \times 10^{-11}$ | 5.2   | $2.90 \times 10^{-02}$ | 2.6  |                        |      |
|                                | ParC (PSK)           |                        |       | $4.40 \times 10^{-02}$ | 0.1  |                        |      |
| MAINTENANCE                    | ParDE (PSK)          | $5.50 \times 10^{-08}$ | 2.3   |                        |      | $7.80 \times 10^{-05}$ | 3.4  |
|                                | PhD, Doc (PSK)       | $3.20 \times 10^{-07}$ | 11.9  |                        |      | $2.90 \times 10^{-03}$ | 8.8  |
|                                | plasmid maintenance  |                        |       | $4.40 \times 10^{-02}$ | 0.1  |                        |      |
|                                | RelBE (PSK)          | $2.70 \times 10^{-08}$ | 3.5   |                        |      | $6.10 \times 10^{-04}$ | 4.2  |
|                                | VapBC/Vag (PSK)      | $1.20 \times 10^{-09}$ | 3.9   |                        |      | $1.40 \times 10^{-05}$ | 5.8  |

286 Chromosome-signature ISs are also present on the SERs, and some of them are enriched  
287 to the same order of magnitude in both classes but not in plasmids (highlighted in  
288 Table 6). Among these latter, helicase loader DnaC participates to the replication  
289 initiation of the chromosome (Chodavarapu et al., 2016) whilst Walker-type ATPase  
290 ParA/Soj interacts with ParB/Spo0J in the *parABS* chromosomal partitioning system,  
291 and is required for proper separation of sister origins and synchronous DNA replication  
292 (Murray and Errington, 2008). The other ISs have a regulatory role, either locally or  
293 globally. Nucleoid-associated proteins (NAPs; Dillon and Dorman, 2010) contribute to  
294 the replication regulation: H-NS (histone-like nucleoid structuring protein), IciA  
295 (chromosome initiator inhibitor, LysR family transcriptional regulator), MukBEF  
296 (condensin), and Rob/ClpB (right arm of the replication origin binding protein/curved  
297 DNA-binding protein B, AraC family transcriptional regulator) influence both the  
298 conformation and the functions of chromosomal DNA, replication, recombination and

299 repair. The NAPs also have pleiotropic regulatory roles in global regulation of gene  
300 transcription depending on cell growth conditions (H-NS, IciA, Lrp (leucine-responsive  
301 regulatory protein, Lrp/AsnC family transcriptional regulator), and Rob/ClpB).  
302 Similarly, the membrane fusion protein AcrA is a growth-dependent regulator, mostly  
303 known for its role as a peripheral scaffold mediating the interaction between AcrB and  
304 TolC in the AcrA-AcrB-TolC Resistance-Nodule-cell Division-type efflux pump that  
305 extrudes from the cell compounds that are toxic or have a signaling role (Du et al.,  
306 2018). It is central to the regulation of cell homeostasis and proper development (Anes  
307 et al., 2015; Du et al., 2018; Webber et al., 2009) as well as biofilm formation (Alav et  
308 al., 2018). Fic (cell filamentation protein) targets the DNA gyrase B (GyrB) to regulate  
309 the cell division and cell morphology (Lu et al., 2018) whereas Sula inhibits FtsZ  
310 assembly, hence causing incomplete cell division and filamentation (Chen et al, 2012).  
311 FtsE is involved in the Z-ring assembly and the initiation of constriction, and in late  
312 stage cell separation (Meier et al, 2017).

313 The main divergence between SERs and chromosomes lies in the distribution patterns of  
314 the ACLAME-annotated ISs ( $OR < 10^0$  in the chromosomes vs. SERs comparison). Their  
315 higher abundance on the SERs suggests a stronger link of SERs to plasmids. This  
316 pattern may also arise from the unbalanced taxon representation in our SER dataset due  
317 to a single bacterial lineage. For example, the presence of RepC is likely to be specific to  
318 Rhizobiales SERs (Pinto et al., 2012).

### 319 **Identification of candidate SERs**

320 Since the IS profiles constitute replicon-type signatures, we searched for new putative  
321 SERs or chromosomes among the extra-chromosomal replicons. We used the IS

322 functions as features to perform supervised classification analyses with various training  
 323 sets (Table 7).

324 **Table 7. Performance of the ERT classification procedures**

| TRAINING SET <sup>a</sup>          | $CV_{score}$ <sup>b</sup> | $\sigma_{CV_{score}}$ <sup>c</sup> | $OOB_{score}$ <sup>d</sup> | $\sigma_{OOB_{score}}$ <sup>e</sup> |
|------------------------------------|---------------------------|------------------------------------|----------------------------|-------------------------------------|
| $\{E_{SER}, E'_{plasmid}\}$        | 0.96                      | -                                  | 0.96                       | -                                   |
| $\{E_{SER}, E'_{plasmid}\}^{it}$   | 0.92                      | 0.02                               | 0.93                       | 0.02                                |
| $\{E_{chromosome}, E'_{plasmid}\}$ | 1.00                      | -                                  | 1.00                       | -                                   |
| $\{E_{SER}, E_{chromosome}\}^{it}$ | 0.98                      | 0.00                               | 0.98                       | 0.01                                |

325 <sup>a</sup>  $E_{chromosome}$  and  $E_{SER}$  are host genus-normalized sets of chromosomes or SERs, respectively (cf.  
 326 Table 13).  $E'_{plasmid}$  is derived from the INFOMAP clustering solution, by discarding plasmids belonging to  
 327 clusters also harbouring SERs or chromosomes, and normalized according to host genus. “it” designates the  
 328 iterative procedure.

329 <sup>b</sup> Cross-validation score or mean of iteration cross-validation scores.

330 <sup>c</sup> Standard deviation of iteration cross-validation scores.

331 <sup>d</sup> Out-of bag estimate or mean of iteration Out-of bag estimates.

332 <sup>e</sup> Standard deviation of iteration Out-of bag estimates.

333 The coherence of the SER class (overall high values of the probability for a SER to be  
 334 assigned to its own class in Tables 7 and 8) confirmed that the ISs are robust genomic  
 335 markers for replicon characterization. The low SER probability scores presented by a  
 336 few SERs (Table 8) likely result from a low number of carried ISs (e.g., *Leptospira*), or  
 337 from the absence in the data of lineage-specific ISs (e.g., SER idiosyncratic replication  
 338 initiator RtcB of Vibrionaceae).

339 **Table 8. SER probability to belong to the SER class**

| Genus                | $\bar{P}_{SER}(SER)^a$ |
|----------------------|------------------------|
| <i>Agrobacterium</i> | 0.90                   |
| <i>Aliivibrio</i>    | 0.87                   |
| <i>Anabaena</i>      | 0.94                   |
| <i>Asticcacaulis</i> | 0.95                   |

|                              |      |
|------------------------------|------|
| <i>Brucella</i>              | 0.92 |
| <i>Burkholderia</i>          | 0.89 |
| <i>Butyrivibrio</i>          | 0.83 |
| <i>Chloracidobacterium</i>   | 0.88 |
| <i>Cupriavidus</i>           | 0.94 |
| <i>Cyanothece</i>            | 0.86 |
| <i>Deinococcus</i>           | 0.78 |
| <i>Ensifer/Sinorhizobium</i> | 0.90 |
| <i>Ilyobacter</i>            | 0.88 |
| <i>Leptospira</i>            | 0.54 |
| <i>Nocardiopsis</i>          | 0.90 |
| <i>Ochrobactrum</i>          | 0.96 |
| <i>Paracoccus</i>            | 0.96 |
| <i>Photobacterium</i>        | 0.95 |
| <i>Prevotella</i>            | 0.92 |
| <i>Pseudoalteromonas</i>     | 0.91 |
| <i>Ralstonia</i>             | 0.95 |
| <i>Rhodobacter</i>           | 0.69 |
| <i>Sphaerobacter</i>         | 0.88 |
| <i>Sphingobium</i>           | 0.73 |
| <i>Thermobaculum</i>         | 0.78 |
| <i>Variovorax</i>            | 0.83 |
| <i>Vibrio</i>                | 0.76 |

340 <sup>a</sup> SER probability, averaged per host genus, to belong to the *SER* class in the supervised classification  
341 using  $\{E_{SER}, E_{plasmid}\}^{it}$  as training set.

342 We detected a number of candidate SERs among the plasmids (Table 9a), most of which  
343 are essential to the cell functioning and/or the fitness of the organism (*cf.* Box 1).  
344 Whereas most belong to bacterial lineages known to harbour multipartite genomes,  
345 novel taxa emerge as putative hosts to complex genomes (Rhodospirillales and, to a  
346 lesser extent, Actinomycetales). In contrast, our analyses confirmed only one putative  
347 SER (*Ruegeria* sp. TM1040) within the *Roseobacter* clade (Petersen et al., 2013).  
348 Remarkably, we identified eight candidate chromosomes corresponding to two plasmids,  
349 also identified as candidate SERs, that encode ISs hardly found in extra-chromosomal

350 elements (*e.g.*, DnaG, DnaB, ParC and ParE), and six SERs that part of, or all, our  
 351 analyses associate to standard chromosomes (Table 9b). Notably, *Prevotella intermedia*  
 352 SER (CP003503) shows a very high probability ( $> 0.98$ ) to be a chromosome while its  
 353 annotated chromosome (CP003502), unique of its kind, falls within the plasmid class.  
 354 This approach can thus be extended to test the type of replicon for (re)annotation  
 355 purposes.

### 356 **Table 9. Identification of ERs among the extra-chromosomal replicons**

#### 357 a. Candidate-SERs identified among plasmids

| REPLICON                                                                                                              | PROBABILITY <sup>a</sup> |
|-----------------------------------------------------------------------------------------------------------------------|--------------------------|
| <i>Acaryochloris marina</i> MBIC11017 plasmid pREB1 [CYANOBACTERIA : Chroococcales] (CP000838)                        | 0.578                    |
| <i>Acaryochloris marina</i> MBIC11017 plasmid pREB2 [CYANOBACTERIA : Chroococcales] (CP000839)                        | 0.582                    |
| <i>Agrobacterium</i> sp. H13-3 plasmid pAspH13-3a [ $\alpha$ -PROTEOBACTERIA : Rhizobiales] (CP0022)                  | 0.565                    |
| <i>Arthrobacter chlorophenolicus</i> A6 plasmid pACHL01 [ACTINOBACTERIA : Actinomycetales] (CP001342)                 | 0.648                    |
| <i>Azospirillum brasilense</i> Sp245 plasmid AZOBR_p1 [ $\alpha$ -PROTEOBACTERIA : Rhodospirillales] (HE577328)       | 0.878                    |
| <i>Azospirillum brasilense</i> Sp245 plasmid AZOBR_p2 [ $\alpha$ -PROTEOBACTERIA : Rhodospirillales] (HE577329)       | 0.591                    |
| <i>Azospirillum brasilense</i> Sp245 plasmid AZOBR_p3 [ $\alpha$ -PROTEOBACTERIA : Rhodospirillales] (HE577330)       | 0.603                    |
| <i>Azospirillum lipoferum</i> 4B plasmid AZO_p1e [ $\alpha$ -PROTEOBACTERIA : Rhodospirillales] (FQ311869)            | 0.722                    |
| <i>Azospirillum lipoferum</i> 4B plasmid AZO_p2 [ $\alpha$ -PROTEOBACTERIA : Rhodospirillales] (FQ311870)             | 0.609                    |
| <i>Azospirillum lipoferum</i> 4B plasmid AZO_p4 [ $\alpha$ -PROTEOBACTERIA : Rhodospirillales] (FQ311872)             | 0.645                    |
| <i>Azospirillum</i> sp. B510 plasmid pAB510a [ $\alpha$ -PROTEOBACTERIA : Rhodospirillales] (AP010947)                | 0.732                    |
| <i>Azospirillum</i> sp. B510 plasmid pAB510c [ $\alpha$ -PROTEOBACTERIA : Rhodospirillales] (AP010949)                | 0.545                    |
| <i>Azospirillum</i> sp. B510 plasmid pAB510d [ $\alpha$ -PROTEOBACTERIA : Rhodospirillales] (AP010950)                | 0.530                    |
| <i>Burkholderia phenoliruptrix</i> BR3459a plasmid pSYMBR3459 [ $\beta$ -PROTEOBACTERIA : Burkholderiales] (CP003865) | 0.663                    |
| <i>Burkholderia phymatum</i> STM815 plasmid pBPHY01 [ $\beta$ -PROTEOBACTERIA : Burkholderiales] (CP001045)           | 0.733                    |
| <i>Burkholderia</i> sp. Y123 plasmid byi_1p [ $\beta$ -PROTEOBACTERIA : Burkholderiales] (CP003090)                   | 0.846                    |
| <i>Clostridium botulinum</i> A3 str. Loch Maree plasmid pCLK [FIRMICUTES : Clostridiales] (CP000963)                  | 0.531                    |
| <i>Clostridium botulinum</i> Ba4 str. 657 plasmid pCLJ [FIRMICUTES : Clostridiales] (CP001081)                        | 0.531                    |
| <i>Cupriavidus metallidurans</i> CH34 megaplasmid [ $\beta$ -PROTEOBACTERIA : Burkholderiales] (CP000353)             | 0.883                    |
| <i>Cupriavidus necator</i> N-1 plasmid BB1p [ $\beta$ -PROTEOBACTERIA : Burkholderiales] (CP002879)                   | 0.500                    |
| <i>Cupriavidus pinatubonensis</i> JMP134 megaplasmid [ $\beta$ -PROTEOBACTERIA : Burkholderiales] (CP000092)          | 0.513                    |
| <i>Deinococcus geothermalis</i> DSM 11300 plasmid1 [DEINOCOCCUS-THERMUS : Deinococcales] (CP000358)                   | 0.622                    |
| <i>Deinococcus gobiensis</i> I-0 plasmid P1 [DEINOCOCCUS-THERMUS : Deinococcales] (CP002192)                          | 0.812                    |
| <i>Ensifer/Sinorhizobium fredii</i> HH103 plasmid pSfHH103e [ $\alpha$ -PROTEOBACTERIA : Rhizobiales] (HE616899)      | 0.915                    |
| <i>Ensifer/Sinorhizobium fredii</i> NGR234 plasmid pNGR234b [ $\alpha$ -PROTEOBACTERIA : Rhizobiales] (CP000874)      | 0.894                    |
| <i>Ensifer/Sinorhizobium medicae</i> WSM419 plasmid pSMED01 [ $\alpha$ -PROTEOBACTERIA : Rhizobiales] (CP000739)      | 0.942                    |
| <i>Ensifer/Sinorhizobium medicae</i> WSM419 plasmid pSMED02 [ $\alpha$ -PROTEOBACTERIA : Rhizobiales] (CP000740)      | 0.836                    |
| <i>Ensifer/Sinorhizobium meliloti</i> 1021 plasmid pSymA [ $\alpha$ -PROTEOBACTERIA : Rhizobiales] (AE006469)         | 0.818                    |
| <i>Ensifer/Sinorhizobium meliloti</i> 1021 plasmid pSymB [ $\alpha$ -PROTEOBACTERIA : Rhizobiales] (AL591985)         | 0.949                    |
| <i>Ensifer/Sinorhizobium meliloti</i> BL2C plasmid pSINMEB01 [ $\alpha$ -PROTEOBACTERIA : Rhizobiales] (CP002741)     | 0.800                    |
| <i>Ensifer/Sinorhizobium meliloti</i> BL2C plasmid pSINMEB02 [ $\alpha$ -PROTEOBACTERIA : Rhizobiales] (CP002742)     | 0.961                    |
| <i>Ensifer/Sinorhizobium meliloti</i> Rm41 plasmid pSYMA [ $\alpha$ -PROTEOBACTERIA : Rhizobiales] (HE995407)         | 0.922                    |
| <i>Ensifer/Sinorhizobium meliloti</i> Rm41 plasmid pSYMB [ $\alpha$ -PROTEOBACTERIA : Rhizobiales] (HE995408)         | 0.960                    |
| <i>Ensifer/Sinorhizobium meliloti</i> SM11 plasmid pSmeSM11c [ $\alpha$ -PROTEOBACTERIA : Rhizobiales] (CP001831)     | 0.877                    |
| <i>Ensifer/Sinorhizobium meliloti</i> SM11 plasmid pSmeSM11d [ $\alpha$ -PROTEOBACTERIA : Rhizobiales] (CP001832)     | 0.947                    |
| <i>Methylobacterium extorquens</i> AM1 megaplasmid [ $\alpha$ -PROTEOBACTERIA : Rhizobiales] (CP001511)               | 0.538                    |
| <i>Novosphingobium</i> sp. PP1Y plasmid Mpl [ $\alpha$ -PROTEOBACTERIA : Sphingomonadales] (FR856861)                 | 0.523                    |
| <i>Pantoea</i> sp. At-9b plasmid pPAT9B01 [ $\gamma$ -PROTEOBACTERIA : Enterobacteriales] (CP002434)                  | 0.527                    |

|                                                                                                                           |       |
|---------------------------------------------------------------------------------------------------------------------------|-------|
| <i>Paracoccus denitrificans</i> PD1222 plasmid1 [ $\alpha$ -PROTEOBACTERIA : Rhodobacterales] (CP000491)                  | 0.769 |
| <i>Ralstonia solanacearum</i> GMI0 plasmid pGMI0MP [ $\beta$ -PROTEOBACTERIA : Burkholderiales] (AL646053)                | 0.861 |
| <i>Ralstonia solanacearum</i> Po82 megaplasmid [ $\beta$ -PROTEOBACTERIA : Burkholderiales] (CP002820)                    | 0.865 |
| <i>Ralstonia solanacearum</i> PSI07 megaplasmid [ $\beta$ -PROTEOBACTERIA : Burkholderiales] (FP885891)                   | 0.827 |
| <i>Rhizobium etli</i> CFN 42 plasmid p42e [ $\alpha$ -PROTEOBACTERIA : Rhizobiales] (CP000137)                            | 0.700 |
| <i>Rhizobium etli</i> CFN 42 plasmid p42f [ $\alpha$ -PROTEOBACTERIA : Rhizobiales] (CP000138)                            | 0.555 |
| <i>Rhizobium etli</i> CIAT 652 plasmid pA [ $\alpha$ -PROTEOBACTERIA : Rhizobiales] (CP0010)                              | 0.701 |
| <i>Rhizobium etli</i> CIAT 652 plasmid pC [ $\alpha$ -PROTEOBACTERIA : Rhizobiales] (CP001077)                            | 0.792 |
| <i>Rhizobium leguminosarum</i> bv. trifolii WSM1325 plasmid pR132501 [ $\alpha$ -PROTEOBACTERIA : Rhizobiales] (CP001623) | 0.711 |
| <i>Rhizobium leguminosarum</i> bv. trifolii WSM1325 plasmid pR132502 [ $\alpha$ -PROTEOBACTERIA : Rhizobiales] (CP001624) | 0.741 |
| <i>Rhizobium leguminosarum</i> bv. trifolii WSM2304 plasmid pRLG201 [ $\alpha$ -PROTEOBACTERIA : Rhizobiales] (CP001192)  | 0.777 |
| <i>Rhizobium leguminosarum</i> bv. trifolii WSM2304 plasmid pRLG202 [ $\alpha$ -PROTEOBACTERIA : Rhizobiales] (CP001193)  | 0.630 |
| <i>Rhizobium leguminosarum</i> bv. viciae 3841 plasmid pRL11 [ $\alpha$ -PROTEOBACTERIA : Rhizobiales] (AM236085)         | 0.731 |
| <i>Rhizobium leguminosarum</i> bv. viciae 3841 plasmid pRL12 [ $\alpha$ -PROTEOBACTERIA : Rhizobiales] (AM236086)         | 0.718 |
| <i>Ruegeria</i> sp. TM1040 megaplasmid [ $\alpha$ -PROTEOBACTERIA : Rhodobacterales] (CP000376)                           | 0.667 |
| <i>Streptomyces cattleya</i> NRRL 8057 plasmid pSCA [ACTINOBACTERIA : Actinomycetales] (FQ859184)                         | 0.727 |
| <i>Streptomyces cattleya</i> NRRL 8057 plasmid pSCATT [ACTINOBACTERIA : Actinomycetales] (CP003229)                       | 0.702 |
| <i>Streptomyces clavuligerus</i> ATCC 27064 plasmid pSCL4 [ACTINOBACTERIA : Actinomycetales] (CM000914)                   | 0.642 |
| <i>Streptomyces clavuligerus</i> ATCC 27064 plasmid pSCL4 [ACTINOBACTERIA : Actinomycetales] (CM001019)                   | 0.642 |
| <i>Thermus thermophilus</i> HB8 plasmid pTT27 [DEINOCOCCUS-THERMUS : Thermales] (AP008227)                                | 0.500 |
| <i>Thermus thermophilus</i> JL-18 plasmid pTTJL1801 [DEINOCOCCUS-THERMUS : Thermales] (CP0033)                            | 0.557 |
| <i>Tistrella mobilis</i> KA081020-065 plasmid pTM2 [ $\alpha$ -PROTEOBACTERIA : Rhodospirillales] (CP003238)              | 0.578 |
| <i>Tistrella mobilis</i> KA081020-065 plasmid pTM3 [ $\alpha$ -PROTEOBACTERIA : Rhodospirillales] (CP003239)              | 0.797 |

## 358 b. Candidate chromosomes identified among extra-chromosomal replicons

| REPLICON                                                                                                        | PROBABILITY <sup>a</sup> |
|-----------------------------------------------------------------------------------------------------------------|--------------------------|
| <i>Anaeba</i> sp. 90 chromosome chANA02 [CYANOBACTERIA : Chroococcales] (CP003285)                              | 0.638                    |
| <i>Asticcacaulis excentricus</i> CB 48 chromosome 2 [ $\alpha$ -PROTEOBACTERIA : Caulobacterales] (CP002396)    | 0.637                    |
| <i>Azospirillum brasilense</i> Sp245 plasmid AZOBR_p1 [ $\alpha$ -PROTEOBACTERIA : Rhodospirillales] (HES77328) | 0.774                    |
| <i>Methylobacterium extorquens</i> AM1 megaplasmid [ $\alpha$ -PROTEOBACTERIA : Rhizobiales] (CP001511)         | 0.669                    |
| <i>Nocardioides dassonvillei</i> DSM 43111 chromosome 2 [ACTINOBACTERIA : Actinomycetales] (CP002041)           | 0.539                    |
| <i>Paracoccus denitrificans</i> PD1222 chromosome2 [ $\alpha$ -PROTEOBACTERIA : Rhodobacterales] (CP000490)     | 0.778                    |
| <i>Prevotella intermedia</i> 17 chromosome II [BACTEROIDETES : Bacteroidales] (CP0033)                          | 0.984                    |
| <i>Prevotella melaninogenica</i> ATCC 845 chromosome II [BACTEROIDETES : Bacteroidales] (CP002123)              | 0.698                    |

359 <sup>a</sup> Probability for an extra-chromosomal replicon, *i.e.*, plasmid or SER, to belong to the SER (a) or Chromosome  
360 (b) class according to the supervised classification procedures.

### 361 **BOX 1. CHARACTERISTICS OF CANDIDATE SERS**

362 According to the literature, most candidate SERS that we detected among plasmids (Table 9a) were  
363 expected to be essential to the cell functioning and/or to the fitness of the organism.

364 • *Azospirillum* genomes are constituted of multiple replicons, at least one of which is expected to be  
365 essential. The largest extra-chromosomal replicon in *A. brasilense* was proposed to be essential for  
366 bacterial life (Wisniewski-Dyé et al., 2011) since it encodes well-conserved housekeeping genes involved  
367 in DNA replication, RNA metabolism and biosynthesis of nucleotides and cofactors, as well as in  
368 transport and protein post-translational modifications. This replicon is unambiguously identified as a SER  
369 by our analyses, as additional replicons found in *A. lipoferum* and *A. sp.* B510, expected homologues

370 to *A. brasilense* SER (Acosta-Cruz et al., 2012). In contrast, other extra-chromosomal replicons classified  
371 as chromids by Wisniewski-Dyé et al. (2012) are unlikely to be true essential replicons. They were not  
372 retrieved among our candidate SERs.

373 • In *Rhizobium etli* CFN42, functional interactions among sequences scattered in the different  
374 extrachromosomal replicons are required for successful completion of life in symbiotic association  
375 with plant roots or saprophytic growth (Brom et al., 2000). p42e (CP000137) is the only replicon other  
376 than the chromosome that contains genes involved in the primary metabolism (Landeta et al., 2011;  
377 Villaseñor *et al.* 2011) and evades its elimination by co-integration with other replicons including the  
378 chromosome (Landeta et al., 2011). Furthermore, homologues to this replicon were identified in the  
379 genomes of other *R. etli* strains as well as other *Rhizobium* species: *R. etli* CIAT652 pA,  
380 *R. leguminosarum* bv. *viciae* 3841 pRL11, *R. leguminosarum* bv. *trifolii* WSM2304 pRLG202 and  
381 *R. leguminosarum* bv. *trifolii* WSM1325 pR132502 (CP001075, AM236085, CP001193, and CP001624,  
382 respectively) (Landeta et al., 2011; Villaseñor et al., 2011). These replicons were thus proposed to be  
383 secondary chromosomes (Landeta et al., 2011).

384 • The genome of *Ensifer/Sinorhizobium meliloti* AK83 was the single multipartite-annotated  
385 *Ensifer/Sinorhizobium* genomes present in our dataset. This bacterium carries two large extra-  
386 chromosomal replicons that are involved in the establishment of the nitrogen fixation symbiosis with  
387 legume plants. pSymA contains most of the genes involved in the nodulation and nitrogen fixation  
388 whereas pSymB carries exopolysaccharide biosynthetic genes, also required for the establishment of the  
389 symbiosis. Our analyses identifies candidate SERs similar to *S. meliloti* AK83 pSymA and pSymB in  
390 other *S. meliloti* strains as well as in *S. fredii* and *S. medicae*. pSymB has been referred to as second  
391 chromosome for carrying genes encoding essential house-keeping functions (Blanca-Ordóñez et al., 2010 ;  
392 Galardini et al., 2011). It shows a higher level of conservation across strains and species than pSymA  
393 (Galardini et al., 2013). pSymA, generally thought to be as stable as pSymB, greatly contribute to the  
394 bacterial fitness in the rhizosphere (Blanca-Ordóñez et al., 2010; Galardini et al., 2013).

395 • The identification of *Methylobacterium extorquens* AM1 1.2 Mb megaplasmid as a SER is supported by  
396 its presence in the genome in a predicted one copy number, by its coding a truncated *luxI* gene essential  
397 for the operation of two chromosomally-located *luxI* genes, as well as the single *umuDC* cluster involved  
398 in SOS DNA repair, and by the presence of a 130 kb region syntenic to a region of similar length in the

399 chromosome of *Methylobacterium extorquens* strain DM4 (Vuilleumier et al., 2009).

400 • The megaplasmid (821 kb) in *Ruegeria* sp. TM1040 carries more rRNA operons (3) than the  
401 chromosome (1) and several unique genes (Moran et al., 2007). *Ruegeria* sp. TM1040 is the only species  
402 in the *Roseobacter* group that possesses a SER. None of the plasmids in the other species included in our  
403 datasets qualified as SERs according to our results in contrast to the commonly held view (Petersen et al.,  
404 2013).

405 • In *Burkholderia* genus, additional ERs possess a centromere whose sequence is distinct from, but  
406 strongly resembles that of the chromosome centromere (Dubarry et al., 2009). However, these  
407 centromeres have a common origin and a plasmid ancestry (Passot et al., 2012). The evolution of these  
408 replicons into SERs is best accounted for by the high level of plasticity observed in the *Burkholderia*  
409 genomes, with extra-chromosomal replicons going through extensive exchange of genetic material among  
410 them as well as with the chromosomes (Maida et al., 2014).

411 • *Acaryochloris marina* MBIC11017 pREB1 (CP000838) and pREB2 (CP000839) plasmids were  
412 identified as candidate SERs. Both these megaplasmids code for metabolic key-proteins, and are thus  
413 likely to contribute to the bacterium fitness (Swingley et al., 2008).

414 • The genomes of *Streptomyces cattleya* NRRL8057 and *S. clavuligerus* ATCC27064 harbour a linear  
415 megaplasmid (1.8 Mb) that shows a high probability ( $P \approx 0.7$ ) to be a SER. The megaplasmid of  
416 *S. cattleya* NRRL8057 encodes genes involved in the synthesis of various antibiotics and secondary  
417 metabolites and is expected to be important to the life of the bacterium in its usual habitat (Barbe et al.,  
418 2011; O'Rourke et al., 2009). In *S. clavuligerus* ATCC27064, none of the megaplasmid-encoded genes are  
419 expected to belong to the core genome (Medema et al., 2010). However, the megaplasmid is likely to  
420 contribute to the bacterium fitness. It represents more than 20% of the coding genome and constitutes a  
421 large reservoir of genes involved in bioactive compound production and cross-regulation with the  
422 chromosome (Medema et al., 2010). Furthermore, *S. clavuligerus* chromosome requires the SER-encoded  
423 *tap* gene involved in the telomere replication.

424 • *Butyrivibrio proteoclasticus* B316 harbours two plasmid, one of which, pCY186 plasmid (CP001813),  
425 was identified as a candidate SERs by our analysis, albeit with a low probability (0.56). In support to this,  
426 it carries numerous genes coding for proteins involved in replication of the chromosome (Yeoman et al.,  
427 2011). The second plasmid in that strain, pCY360 (CP001812), also proposed to be an essential replicon



428 in that bacterium (Yeoman et al., 2011), presents too low a probability ( $P = 0.32$ ) in our analysis to qualify  
429 as a SER.

## 430 **DISCUSSION**

431 The SERs clearly stand apart from plasmids, including those that occur consistently in a  
432 bacterial species, *e.g.*, *Lactobacillus salivarius* pMP118-like plasmids (Li et al., 2007).

433 The replicon size proposed as a primary classification criterion to separate the SERs  
434 from the plasmids (diCenzo and Finan, 2017; Harrison et al., 2010) proves to be  
435 inoperative. The IS profiles accurately identify the SERs of *Leptospira* and *Butyrivibrio*  
436 despite their plasmid-like size, and unambiguously ascribe the chromosomes in the  
437 reduced genomes of endosymbionts (sizes down to 139 kb) to the chromosome class.

438 Conversely, they assign *Rhodococcus jostii* RHA1 1.12 Mb-long pRHL1 replicon to the  
439 plasmid class, and do not discriminate the megaplasmids ( $>350$  kb (diCenzo and Finan,  
440 2017)) from smaller plasmids. Plasmids may be stabilized in a bacterial population by  
441 rapid compensatory adaptation that alleviates the fitness cost incurred by their presence  
442 in the cell (San Millan et al., 2014; Hall et al., 2017; Stalder et al., 2017). This  
443 phenomenon involves mutations either on the chromosome only, on the plasmid only, or  
444 both, and does not preclude the segregational loss of the plasmid. On the contrary, SERs  
445 code for chromosome-type IS proteins that integrate them constitutively in the species  
446 genome and the cell cycle. The SERs thence qualify as essential replicons regardless of  
447 their size and of the phenotypical/ecological, possibly essential, functions that they  
448 encode and which vary across host taxa.

449 Yet, SERs also carry plasmid-like ISs, suggesting a role for plasmids in their formation.

450 The prevailing opinion assumes that SERs derive from the amelioration of  
451 megaplasmids (diCenzo and Finan, 2017; diCenzo et al., 2013; Harrison et al., 2010;

452 MacLellan et al., 2004; Slater et al., 2009): a plasmid bringing novel functions for the  
453 adaptation of its host to a new environment is stabilized into the bacterial species  
454 genome through the transfer from the chromosome of essential genes (diCenzo and  
455 Finan, 2017; Slater et al., 2009). However, the generalized presence of chromosome-like  
456 ISs in the SERs of the various taxa with multipartite genomes is unlikely to derive from  
457 the action of environment-specific and lineage-specific selective forces. In reverse, all  
458 bacteria with similar lifestyle and exhibiting some phylogenetic relatedness may not  
459 harbor multiple ERs (*e.g.*,  $\alpha$ -proteobacterial nitrogen-fixing legume symbionts). Also,  
460 the gene shuttling from chromosome to plasmid proposition fails to account for the  
461 situation met in the multipartite genomes of *Asticacaulis excentricus*, *Paracoccus*  
462 *denitrificans* and *Prevotella* species. Their chromosome-type ISs are evenly distributed  
463 between the chromosome and the SER whereas their homologues in the mono- or  
464 multipartite genomes of most closely related species are primarily chromosome-coded  
465 (see Table 10 for an example). This pattern, mirrored in their whole gene content (Naito  
466 et al., 2016; Poirion, 2014), hints at the stemming of the two essential replicons from a  
467 single chromosome by either a splitting event or a duplication followed by massive gene  
468 loss. Neither mechanism informs on the presence of plasmid-type maintenance  
469 machinery on one of the replicons. The severing of a chromosome generates a single  
470 true replicon carrying the chromosome replication origin and an origin-less remnant,  
471 whilst the duplication of the chromosome produces two chromosomal replicons with  
472 identical maintenance systems. Whereas multiple copies of the chromosome are known  
473 to cohabit constitutively in polyploid bacteria (Ohtani et al., 2010), the co-occurrence of  
474 dissimilar chromosomes bearing identical replication initiation and partition systems is  
475 yet to be described in bacteria.

**Table 10. IS profiles of *Paracoccus denitrificans* vs. *Rhodobacter sphaeroides* (Rhodobacterales)**

Chromosome-like IS functions coded only by the SER in *P. denitrificans* or *R. sphaeroides* whilst by the chromosome in other Rhodobacterales are indicated by an asterisk. Numbers corresponds to the number of homologues (*P. denitrificans* PD1222) or the percentage of function-coding replicons (*R. sphaeroides* and Rhodobacterales genomes).

476  
477

| IS FUNCTION GROUP            |                               | <i>Paracoccus denitrificans</i> PD1222 |                        |                     | <i>Rhodobacter sphaeroides</i> |              |                  | Other Rhodobacterales |                  |              |
|------------------------------|-------------------------------|----------------------------------------|------------------------|---------------------|--------------------------------|--------------|------------------|-----------------------|------------------|--------------|
|                              |                               | chromosome1 (CP000489)                 | chromosome2 (CP000490) | plasmid1 (CP000491) | chromosome % (n=12)            | SER % (n=12) | plasmid % (n=14) | chromosome % (n=12)   | plasmid % (n=33) | SER % (n=33) |
| KEGG entry (chromosome-like) | REPLICATION                   | CbpA                                   | 1                      |                     |                                | 100          |                  |                       | 75               |              |
|                              | Dam                           | 1                                      |                        |                     | 50                             | 75           |                  | 25                    |                  |              |
|                              | DnaA                          | *                                      | 1                      |                     | 100                            |              |                  | 92                    |                  |              |
|                              | DnaB                          | *                                      | 1                      |                     | 100                            |              |                  | 100                   |                  |              |
|                              | DnaC                          |                                        |                        |                     | 25                             |              |                  |                       | 3                |              |
|                              | DnaG                          | *                                      | 1                      |                     | 100                            |              |                  | 100                   |                  |              |
|                              | Dps                           | 1                                      |                        |                     |                                |              |                  | 50                    | 15               |              |
|                              | Fis                           | *                                      | 1                      |                     | 100                            |              |                  | 75                    |                  |              |
|                              | Hda                           |                                        |                        |                     |                                |              |                  | 42                    |                  |              |
|                              | Hfq                           | *                                      | 1                      |                     | 100                            |              |                  | 100                   |                  |              |
|                              | H-NS                          | 2                                      | 2                      |                     | 100                            |              | 29               | 67                    | 9                |              |
|                              | HupA                          |                                        |                        |                     |                                |              |                  | 17                    |                  |              |
|                              | HupB                          | 1                                      |                        |                     | 100                            |              |                  | 100                   |                  |              |
|                              | IciA                          | 1                                      |                        |                     |                                |              | 36               | 67                    |                  |              |
|                              | IhfA, HimA                    | 1                                      |                        |                     | 100                            |              |                  | 100                   |                  |              |
|                              | IhfB, HimD                    | *                                      | 1                      |                     | *                              | 100          |                  | 100                   |                  |              |
|                              | Lrp                           | 4                                      | 1                      | 3                   | 100                            | 25           | 50               | 100                   | 9                |              |
|                              | Rob                           |                                        |                        |                     | 25                             |              |                  | 8                     |                  |              |
|                              | ssb                           | 1                                      | 3                      |                     | 100                            | 100          |                  | 100                   | 3                |              |
|                              | KEGG entry (chromosome-like)  | Fic                                    |                        |                     |                                |              |                  | 7                     | 8                | 6            |
| GidA, MnmG, MTO1             |                               | 1                                      |                        |                     | 100                            |              |                  | 100                   |                  |              |
| GidB, RsmG                   |                               | 1                                      |                        |                     | 100                            |              |                  | 100                   |                  |              |
| MreB                         |                               | *                                      | 1                      |                     | 100                            |              |                  | 92                    |                  |              |
| MreC                         |                               | *                                      | 1                      |                     | 100                            |              |                  | 92                    |                  |              |
| MreD                         |                               | *                                      | 1                      |                     | 100                            |              |                  | 92                    |                  |              |
| Mrp                          |                               | 1                                      |                        |                     | 100                            |              |                  | 100                   |                  |              |
| ParA, Soj                    |                               | 4                                      | 1                      |                     | 100                            |              |                  | 100                   | 9                |              |
| ParB, Spo0J                  |                               | 3                                      | 1                      | 1                   | 100                            | 75           |                  | 100                   | 42               |              |
| ParC                         |                               | 1                                      | 1                      |                     | 100                            |              |                  | 100                   |                  |              |
| ParE                         |                               | 1                                      |                        |                     | 100                            |              |                  | 100                   |                  |              |
| RodA, MrdB                   |                               | *                                      | 1                      |                     | 100                            |              |                  | 92                    |                  |              |
| TrmFO, Gid                   |                               | *                                      | 1                      |                     | 100                            |              |                  | 100                   |                  |              |
| XerC                         |                               | 1                                      |                        |                     | 100                            |              |                  | 100                   |                  |              |
| XerD                         |                               | 1                                      |                        |                     | 100                            | 25           | 7                | 100                   | 6                |              |
| SEGREGATION                  |                               | ScpA                                   | 1                      |                     |                                | 100          |                  | 100                   |                  |              |
| ScpB                         |                               | 1                                      |                        |                     | 100                            |              |                  | 100                   |                  |              |
| Smc                          |                               | 1                                      |                        |                     | 100                            |              |                  | 100                   |                  |              |
| AcrA                         |                               | 2                                      | 2                      |                     | *                              | 100          | 7                | 58                    |                  |              |
| CELL DIVISION                |                               | AmiA, AmiB, AmiC                       | 1                      |                     |                                | 100          |                  | 100                   |                  |              |
|                              | FtsA                          | *                                      | 1                      |                     | 100                            |              | 83               |                       |                  |              |
|                              | FtsE                          | 1                                      |                        |                     | 100                            |              | 7                | 92                    |                  |              |
|                              | FtsI                          | 1                                      |                        |                     | 100                            |              |                  | 92                    |                  |              |
|                              | FtsK, SpoIIIE                 | 1                                      |                        |                     | 100                            |              |                  | 100                   |                  |              |
|                              | FtsQ                          | *                                      | 1                      |                     | 100                            |              |                  | 92                    |                  |              |
|                              | FtsW, SpoVE                   | 1                                      |                        |                     | 100                            |              |                  | 100                   |                  |              |
|                              | FtsX                          | 1                                      |                        |                     | 100                            |              | 7                | 92                    |                  |              |
|                              | FtsZ                          | *                                      | 1                      |                     | 100                            |              |                  | 100                   |                  |              |
|                              | MinC                          |                                        |                        | 1                   |                                |              |                  |                       |                  |              |
| MinD                         |                               |                                        | 1                      |                     | 75                             |              | 75               |                       |                  |              |
| MinE                         |                               |                                        | 1                      |                     |                                |              |                  |                       |                  |              |
| ZapA                         | 1                             |                                        |                        | 100                 |                                |              | 100              |                       |                  |              |
| ACLAME family (plasmid-like) | REPLICATION                   | DNA helicase                           |                        |                     | 25                             | 50           | 7                | 25                    |                  |              |
|                              | Helicase-1                    | 1                                      | 1                      |                     | 100                            | 50           |                  | 92                    | 3                |              |
|                              | Helicase-2                    |                                        |                        |                     |                                |              |                  | 8                     | 3                |              |
|                              | DNA repair                    |                                        |                        |                     |                                |              |                  | 8                     |                  |              |
|                              | RepA                          | 2                                      | 2                      |                     |                                |              | 43               |                       | 42               |              |
|                              | RepAEB                        |                                        |                        | 1                   |                                | 100          | 7                |                       | 15               |              |
|                              | RepC                          | 1                                      |                        |                     | 50                             |              | 43               | 8                     | 24               |              |
|                              | RuvB                          | 1                                      |                        |                     | 100                            |              | 7                | 92                    |                  |              |
|                              | ATPase, TyrK, ExoP            | 2                                      |                        |                     | 100                            | 50           | 14               | 75                    | 15               |              |
|                              | ParA, ParM                    |                                        | 1                      | 1                   |                                | 100          | 100              | 8                     | 88               |              |
|                              | ParB                          |                                        |                        |                     | 75                             | 100          | 93               | 25                    | 64               |              |
|                              | plasmid dimer resolution      |                                        |                        |                     |                                |              | 14               |                       | 15               |              |
|                              | Serine recombinase            | 3                                      |                        |                     | 25                             |              | 50               | 50                    | 30               |              |
|                              | Tyrosine recombinase          |                                        |                        |                     | 25                             |              | 7                | 33                    | 6                |              |
|                              | Xer-like tyrosine recombinase |                                        | 1                      |                     | 25                             | 50           |                  | 33                    | 6                |              |
| XerD                         |                               |                                        |                        | 25                  |                                |              |                  |                       |                  |              |
| MAINTENANCE                  | Ccd (PSK)                     |                                        |                        |                     |                                |              | 7                |                       |                  |              |
|                              | HicAB (PSK)                   |                                        |                        |                     |                                |              | 7                |                       |                  |              |
|                              | HigBA (PSK)                   | 2                                      |                        |                     |                                |              | 14               | 17                    | 6                |              |
|                              | MazEF (PSK)                   |                                        |                        |                     |                                |              | 7                |                       | 6                |              |
|                              | ParDE (PSK)                   | 2                                      | 6                      |                     | 25                             | 50           | 7                | 8                     | 15               |              |
|                              | PhD, Doc (PSK)                |                                        |                        |                     |                                |              | 7                |                       |                  |              |
|                              | RelBE (PSK)                   | 1                                      |                        |                     |                                |              |                  |                       | 3                |              |
| VapBC/Vag (PSK)              | 3                             | 2                                      |                        |                     |                                | 14           | 8                | 9                     |                  |              |

479 We propose that the requirement for maintenance system compatibility between co-  
480 occurring replicons is the driving force behind the presence of plasmid-type replication  
481 initiation and maintenance systems in bacterial SERs. Indeed, genes encoding  
482 chromosome-like replication initiators (DnaA) are hardly found on SERs. When they  
483 are, in *Paracoccus denitrificans*, *Prevotella intermedia* and *P. melaninogenica*, the  
484 annotated chromosome in the corresponding genome does not carry one. Similarly,  
485 chromosomal centromeres (*parS*) are found on a single replicon within a multipartite  
486 genome, which is the chromosome in all genomes but one. In *P. intermedia*  
487 (GCA\_000261025.1), both replication initiation and partition systems define the SER as  
488 the *bona fide* chromosome and the annotated chromosome as an extra-chromosomal  
489 replicon. The harmonious coexistence of different replicons in a cell requires that they  
490 use divergent enough maintenance systems. In the advent of a chromosome fission or  
491 duplication, the involvement of an autonomously self-replicating element different from  
492 the chromosome is mandatory to provide one of the generated DNA molecules with a  
493 (non-chromosomal) maintenance machinery.

494 ‘Plasmid-first’ and ‘chromosome-first’ hypotheses can be reconciled into a unified,  
495 general Fusion-Shuffling-Scission model of SER emergence where a chromosome and a  
496 plasmid combine into a cointegrate (Fig. 6). Plasmids are known to merge or to integrate  
497 chromosomes in both experimental settings (Brom et al., 2000 ; Guo et al., 2003;  
498 Iordănescu, 1975 ; Sýkora, 1992) and the natural environment (Cervantes et al., 2011;  
499 Naito et al., 2016; Sýkora, 1992), as are the SER and chromosome of a multipartite  
500 genome (Val et al., 2014; Xie et al., 2017; Yamamoto et al., 2018). When integrated, the  
501 plasmids/SERs can thus replicate with the chromosome and persist in the bacterial  
502 lineage through several generations (Cervantes et al., 2011; Val et al., 2014; Xie et al.,  
503 2017). The co-integrate may resolve into its original components (Guo et al., 2003; Val

504 et al., 2014) or give rise to novel genomic architectures (Guo et al., 2003; Cervantes et  
 505 al., 2011; Val et al., 2014). The co-integration state likely facilitates inter-replicon gene  
 506 exchanges and genome rearrangements that may lead to the translocation of large  
 507 chromosome fragments to the resolved plasmid (Guo et al., 2003; Val et al., 2014).  
 508 Multiple cell divisions, and possibly several merging-resolution rounds, could provide  
 509 time and opportunity for the plasmid-chromosome re-assortment to take place, and for  
 510 multiple essential replicons and a viable distributed genome to form ultimately. In the  
 511 novel genome, one ER retains the chromosome-like origin of replication and  
 512 centrosome, and the other the plasmidic counterparts. The novel ERs differ from the  
 513 chromosome and plasmid that gathered in the progenitor host at the onset. They thus  
 514 constitute neo-chromosomes that carry divergent maintenance machineries and can  
 515 cohabit and function in the same cell. Depending on the number of cell cycles spent as  
 516 co-integrate, the level of genome reorganization, the acquisition of genetic material and  
 517 the environmental selective pressure acting upon the host, the final essential replicons  
 518 may exhibit diverse modalities of genome integration (Figure 6).

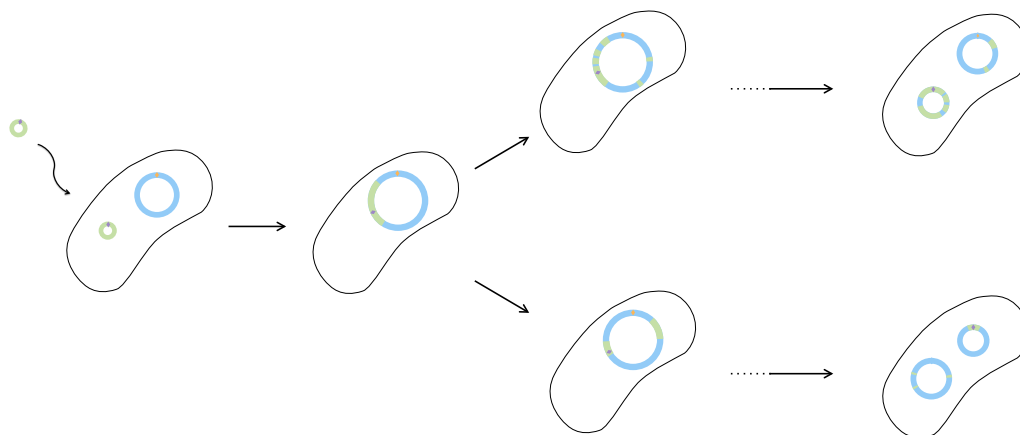

519

520 **Figure 6. Fusion-Shuffling-Scission model of distributed genome evolution**

521 Origins of replication are represented by diamonds.

522

523 The Fusion-Shuffling-Scission model of genome evolution that we propose accounts for  
524 the extreme plasticity met in distributed genomes and the eco-phenotypic flexibility of  
525 their hosts. Indeed, having a distributed genome appears to extend and accelerate the  
526 exploration of the genome evolutionary landscape, producing complex regulation  
527 (diCenzo et al., 2018; Galardini et al., 2015; Jiao et al., 2018) and leading to novel eco-  
528 phenotypes and species diversification (*e.g.*, Burkholderiaceae and Vibrionaceae).  
529 Furthermore, this model may explain the observed separation of the replicons according  
530 to taxonomy. Chromosomes and plasmids thus appear as extremes on a continuum of a  
531 lineage-specific genetic material.

## 532 **MATERIALS AND METHODS**

533 To understand the relationships between the chromosomal and plasmidic replicons, we  
534 focused on the distribution of Inheritance System (IS) genes for each replicon and built  
535 networks linking the replicons given their IS functional orthologues (Fig. 2).

### 536 **Retrieval of IS functional homologues**

537 A sample of proteins involved in the replication and segregation of bacterial replicons  
538 and of the bacterial cell cycle was constructed using datasets available from the  
539 ACLAME (Leplae et al., 2010) and KEGG (Kanehisa et al., 2012) databases. Gene  
540 ontologies for “replication”, “partition”, “dimer resolution”, and “genome maintenance”  
541 (Table 11) were used to select related ACLAME plasmid protein families (Table 1)  
542 using a semi-automated procedure.

543  
544

**Table 11. Gene ontologies related to plasmid ISs used to select groups of orthologous proteins from the ACLAME database**

| PROCESS          | ONTOLOGY             | DESCRIPTION                                    |
|------------------|----------------------|------------------------------------------------|
| Replication      | <i>go:0006270</i>    | DNA replication initiation                     |
|                  | <i>phi:0000268</i>   | plasmid vegetative DNA replication             |
|                  | <i>go:0003896</i>    | DNA primase activity                           |
|                  | <i>go:0003887</i>    | DNA-directed DNA polymerase activity           |
|                  | <i>go:0045020</i>    | error-prone DNA repair                         |
|                  | <i>go:0006260</i>    | DNA replication                                |
|                  | <i>phi:0000114</i>   | DNA helicase activity                          |
|                  | <i>go:0006281</i>    | DNA repair                                     |
|                  | <i>phi:0000196</i>   | plasmid copy number control                    |
|                  | <i>go:0003677</i>    | DNA binding                                    |
| Partition        | 575                  | plasmid partitioning protein family ParB/Spo0J |
|                  | <i>go:0015616</i>    | DNA translocase activity                       |
|                  | 576                  | plasmid partitioning protein family ParM       |
|                  | <i>go:0000146</i>    | microfilament motor activity                   |
|                  | <i>go:0007059</i>    | chromosome segregation                         |
|                  | <i>go:0015616</i>    | DNA translocase activity                       |
|                  | <i>go:0007059</i>    | chromosome segregation                         |
|                  | <i>go:0016887</i>    | ATPase activity                                |
|                  | <i>go:0030541</i>    | plasmid partitioning                           |
|                  | <i>go:0051302</i>    | regulation of cell division                    |
| Dimer resolution | <i>phi:0000196</i>   | plasmid copy number control                    |
|                  | <i>phi:0000134</i>   | site specific DNA excision                     |
|                  | <i>phi:0000144</i>   | serine based recombinase activity              |
|                  | <i>phi : 0000131</i> | site specific DNA recombinaison                |
|                  | <i>phi : 0000143</i> | Tyrosine-based recombinase activity            |
|                  | <i>phi : 0000304</i> | plasmid dimer resolution                       |
|                  | <i>go : 0015616</i>  | DNA translocase activity                       |
|                  | <i>phi:0000136</i>   | transpositional recombination                  |
| Maintenance      | <i>go : 0016740</i>  | transferase activity                           |
|                  | <i>phi : 0000262</i> | toxin                                          |
|                  | <i>phi:0000322</i>   | PSK                                            |
|                  | 547                  | TA family parDE                                |
|                  | 544                  | TA family epsilon zeta                         |
|                  | <i>go:0009008</i>    | DNA methyltransferase activity                 |
|                  | <i>phi : 0000264</i> | nucleoid associated protein                    |
|                  | <i>go : 0006276</i>  | plasmid maintenance                            |

545 KEGG orthology groups were selected following the KEGG BRITE hierarchical  
 546 classification (Table 2). Then, the proteins belonging to the relevant 92 ACLAME  
 547 protein families and 71 KEGG orthology groups (3,847 and 43,757 proteins,  
 548 respectively) were retrieved and pooled. Using this query set amounting to a total of

549 47,604 proteins, we performed a *blastp* search of the 6,903,452 protein sequences  
550 available from the 5,125 complete sequences of bacterial replicons downloaded from  
551 NCBI Reference Sequence database (RefSeq) (Pruitt et al., 2007) on 30/11/2012. We  
552 identified 358,624 putative homologues using BLAST default parameters (Camacho et  
553 al., 2009) and a  $10^{-5}$  significance cut-off value. We chose this *E*-value threshold to  
554 enable the capture of similarities between chromosome and plasmid proteins whilst  
555 minimizing the production of false positives, *i.e.*, proteins in a given cluster exhibiting  
556 small *E*-values despite not being functionally homologous. Using RefSeq ensured the  
557 annotation consistency of the genomes included in our dataset.

#### 558 **Clustering of IS functional homologues**

559 Using this dataset, we inferred clusters of IS functional homologues by coupling of an  
560 *all-versus-all blastp* search using a  $10^{-2}$  *E*-value threshold and a TRIBE-MCL (Enright et  
561 al., 2002) clustering procedure. As input to TRIBE-MCL, we used the matrix of log  
562 transformed *E*-value,  $d(p_i, p_j) = -\log_{10}(e_{value}(p_i, p_j))$ , obtained from the comparisons  
563 of all possible protein pairs. Using a granularity value of 4.0 (see below), we organized  
564 the 358,624 IS homologues into 7013 clusters, each comprising from a single to 1990  
565 proteins (Figure 3). We annotated IS homologues according to their best match (BLAST  
566 hit with the lowest *E*-value) among the proteins of the query set, *i.e.*, according to one of  
567 the 117 functions of the query set (71 from KEGG and 46 from ACLAME). Then, we  
568 named the clusters of functional homologues using the most frequent annotation among  
569 the proteins in the cluster. We used the number of protein annotations in a cluster to  
570 determine the cluster quality, a single annotation being optimal. To select the best  
571 granularity and to estimate the consistency of the clusters in terms of functional  
572 homologues, we computed the weighted Biological Homogeneity Index (*wBHI*,



573 modified from the *BHI* (Datta and Datta, 2006), each cluster being weighted by its size)  
574 and the Conservation Consistency Measure (*CCM*, similar to the *BHI* but using the  
575 functional domains of the proteins to define the reference classes), which both take into  
576 account the size distribution of the clusters (See next paragraph for details on index  
577 calculation). The former gives an estimation of the overall consistency of clusters  
578 annotations according to the protein annotations whereas the latter gives an estimation of  
579 cluster homogeneity according to the protein domains identified beforehand. To build  
580 the sets of functional domains, we performed an *hmmscan* (Finn et al., 2011) procedure  
581 against the Pfam database (Finn et al., 2016) of each of the 358,624 putative IS  
582 homologues. We annotated each protein according to the domain match(es) with *E*-value  
583  $< 10^{-5}$  (individual *E*-value of the domain) and *c-E*-value  $< 10^{-5}$  (conditional *E*-value that  
584 measures the statistical significance of each domain). If two domains overlapped, we  
585 only considered the domain exhibiting the smallest *E*-value. We estimated *wBHI* and  
586 *CCM* indices for the clustering of the IS homologues and compared with values obtained  
587 for random clusters simulated according to the cluster size distribution of the IS proteins,  
588 irrespective of their length or function. For each of the clustering obtained for different  
589 granularities, we constructed a random clustering following the original cluster size  
590 distribution (assessed with a  $\chi^2$  test) and composed with simulated proteins according to  
591 the distributions of the type and number of functional domains of the data collected from  
592 the 358,624 IS homologues. Overall, the clusters obtained using a granularity of 4.0 with  
593 the TRIBE-MCL algorithm appeared to be homogenous in terms of proteins similarities  
594 toward their best BLAST hits and their functional domain distributions (see below).

### 595 **Evaluation of the clustering procedures**

596 In order to select the best granularity and to estimate the consistency of the clusters in

597 terms of functional homologs, we computed the *weighted Biological Homogeneity Index*  
 598 (*wBHI*) and the *Conservation Consistency Measure (CCM)*. The former gives an  
 599 estimate of the overall consistency of clusters annotations according to the protein  
 600 annotations whereas the latter gives an estimate of cluster homogeneity according to  
 601 protein domains identified beforehand. Although close to the *Biological Homogeneity*  
 602 *Index (BHI)* introduced by Datta and Datta (2006), both these indices take into account  
 603 the size distribution of the clusters.

604 The *BHI* was originally introduced to measure the biological homogeneity of clusters  
 605 according to reference classes to evaluate clusters obtained with microarray data (Datta  
 606 and Datta, 2006). Given a clustering  $C=\{C_1, \dots, C_k\}$  of  $k$  clusters with  $n_i$  the size of the  
 607 cluster  $C_i$ , a set of  $m$  proteins  $P=\{P_1, \dots, P_m\}$  and a set  $r$  of reference classes  $R$  where each  
 608 class  $R_i$  could be linked to the  $m$  proteins, the *BHI* is defined as:

$$BHI = \frac{1}{k} \sum_{i=0}^{i < k} c_i$$

609 where  $c_i$  is defined as:

$$c_i = \frac{1}{(n_i(n_i - 1))} \sum_{P_i, P_j \in C_i} d(P_i, P_j)$$

610 where  $d(P_i, P_j)=1$  if  $P_i$  and  $P_j$  share at least one common reference class, and  $d(P_i, P_j)=0$   
 611 otherwise. The reference classes here are the annotations defined according to the  
 612 protein best BLAST hit. The *BHI* is thus an easy-to-interpret measure, which value is  
 613 maximal when, for all clusters, all the proteins in a cluster share at least one annotation.

614 The *wBHI* is a modification of the *BHI*, where each cluster is weighted by its size  $m$ .  
 615 Following the previous notation scheme, the *wBHI* is defined as:

$$wBHI = \frac{1}{m} \sum_{i=0}^{i < k} 2 \cdot c_i \cdot n_i$$

616 The *CCM* is similar to the *BHI* but the functional domains of the proteins are used to  
 617 define the reference classes. The distance between the proteins is here computed as the  
 618 Jaccard distance between the functional domain sets of the proteins. Every protein  $P_i$  can  
 619 be described as a vector of functional domains,  $D_{P_i} = \{d_1, \dots, d_x\}$ . The Jaccard distance  
 620 between the two sets of domains  $d_2(P_i, P_j)$  can be defined as:

$$d_2(P_1, P_2) = 1 - \frac{|D_{P_1} \cap D_{P_2}|}{|D_{P_1} \cup D_{P_2}|}$$

621 where  $D_{P_1}$  and  $D_{P_2}$  are the clans or domains (when no clan could be assigned) identified  
 622 in  $P_1$  and  $P_2$  respectively. For a given cluster  $C_i$ , the *CCM* is calculated as:

$$CCM = \frac{1}{m} \sum_{i=0}^{i < k} 2 \cdot c'_i \cdot n_i$$

623 where  $c'_i$  is defined as:

$$c'_i = \frac{1}{(n_i(n_i - 1))} \sum_{P_i, P_j \in C_i} d_2(P_i, P_j)$$

624 Clusters which proteins have similar domains result in a *CCM* value close to 0, whereas  
 625 a *CCM* value close to 1 indicates that the clusters hold proteins with little domain  
 626 overlap.

### 627 **Choice of the clustering granularity**

628 We tested several levels of granularity to optimize the TRIBE-MCL clustering and  
 629 obtain the most informative IS clustering in terms of functional linkage. Too low a  
 630 granularity would produce large clusters containing multiple functional families. In turn,  
 631 increasing the granularity results in the tightening of the cluster. A high granularity tends  
 632 to split clusters harboring different protein subfamilies (*e.g.*, a cluster composed of  
 633 proteins from the tyrosine recombinase superfamily) and to produce multiple clusters of  
 634 proteins belonging to a single function family according to their level of sequence

635 dissimilarity. Furthermore, too high a granularity would result in the formation of  
 636 numerous single protein clusters, and would dramatically increase the computation times  
 637 of the following analyses. A granularity level of 4.0 constituted a good compromise  
 638 (Figure 8). Values of *CCM* and *BHI* are slightly improved compared to granularities of  
 639 2.0 and 3.0, and the high but still workable number of clusters is expected to prevent the  
 640 formation of clusters mingling distinct protein subfamilies.

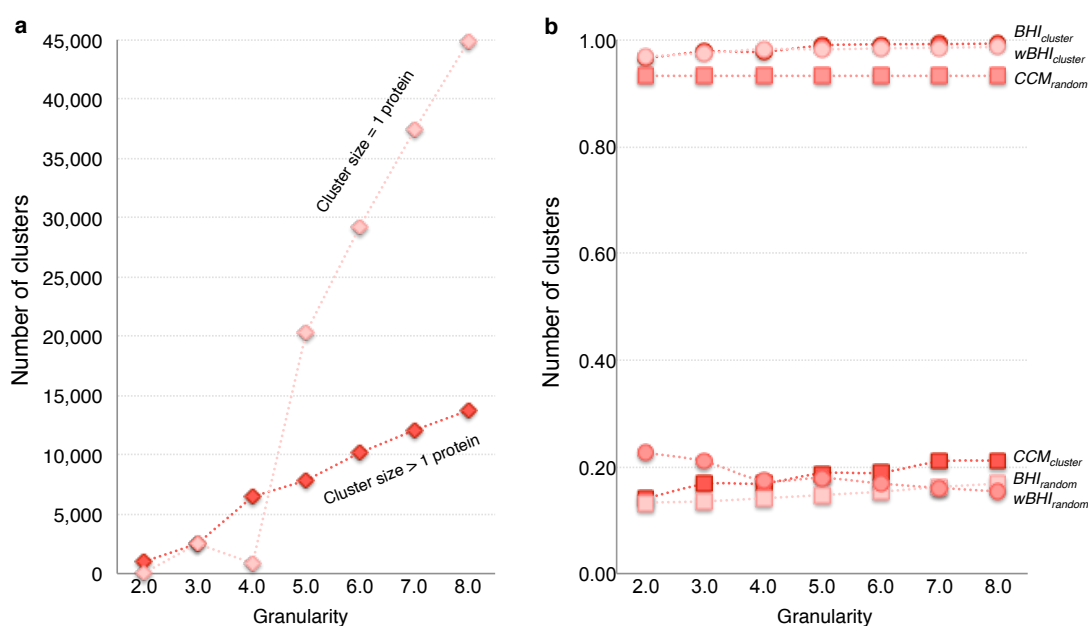

641 **Figure 8. Influence of granularity on the clustering**  
 642 (a) Number of clusters with more than one protein (dark diamonds) or clusters holding a single protein (pale  
 643 diamonds). (b) *BHI* (dark), *wBHI* (pale) and *CCM* (medium) scores obtained with random clusters (squares) and  
 644 normal clusters (circles), respectively.

### 645 Assessment of the homogeneity of IS functional homologues

646 The homogeneity towards the functions of the proteins in the query set relied on the  
 647 assumption that the first BLAST cut-off ( $10^{-5}$  *E*-value) was stringent enough to capture  
 648 only functional homologues to the query proteins. Potential bias might nevertheless arise  
 649 from query proteins possessing a supplementary functional domain unrelated to the IS  
 650 role, or from the selection of proteins belonging to the same superfamily but differing in

651 function. To address these issues, we calculated the functional vectors associated to each  
 652 KEGG group or ACLAME family of the query set, as well as those for all obtained  
 653 clusters. For a protein  $P_i$ , we defined the associated functional vector with respect to its  
 654 set of identified domains  $D_{P_i}$  and to the set of all identified domains  $D=\{d_1, \dots, d_x\}$  as:

$$v_{P_i} = (n_{d_1}^{P_i}, \dots, n_{d_x}^{P_i})$$

655 where  $n_{d_i}^{P_i}$  is the number of time  $d_i$  is found in  $D_{P_i}$ . The functional vector associated to a given  
 656 cluster of proteins  $C_i$  could then be defined as:

$$v_{C_i} = (n_{d_1}^{C_i}, \dots, n_{d_x}^{C_i})$$

657 where  $n_{d_i}^{C_i}$  is defined as:

$$n_{d_i}^{C_i} = \frac{1}{|C_i|} \sum_{P_j \in C_i} n_{d_x}^{P_j}$$

658 For each cluster  $C_0$ , the cosine distance between its associated vector  $v_{C_0}$  and the associated  
 659 vector  $v_{C_a}$  of the corresponding KEGG group or ACLAME family annotations  $C_a$  was then  
 660 computed as:

$$d_{\cosine}(v_{C_a}, v_{C_0}) = 1 - \frac{\sum_{i=1}^X n_{d_i}^{C_0} \cdot n_{d_i}^{C_a}}{\sqrt{\sum_{i=1}^X n_{d_i}^{C_0^2} \cdot \sum_{i=1}^X n_{d_i}^{C_a^2}}}$$

661 For each cluster  $C_0$ , the cosine distance between its associated vector  $v_{C_0}$  and the  
 662 associated vector  $v_{C_a}$  of the corresponding KEGG group or ACLAME family  
 663 annotations  $C_a$  was then computed as:

$$d_{\cosine}(v_{C_a}, v_{C_0}) = 1 - \frac{\sum_{i=1}^X n_{d_i}^{C_0} \cdot n_{d_i}^{C_a}}{\sqrt{\sum_{i=1}^X n_{d_i}^{C_0^2} \cdot \sum_{i=1}^X n_{d_i}^{C_a^2}}}$$

664 The  $d_{\cosine}(v_{C_a}, v_{C_0})$  values were compared with those obtained using random clusters  
 665  $C_r$  of the same size than  $C_0$ . For each  $C_0$  and its corresponding  $C_a$ , 200 random clusters  
 666 and their associated distances  $d_{\cosine}(v_{C_a}, v_{C_r})$ , from which the corresponding empirical

667 distribution  $D_e$  was constructed, were computed.  $C_0$  is then considered as noise if  
 668  $d_{\cosine}(v_{C_a}, v_{C_0}) \notin Q_{10\%}^{D_e}$  where  $Q_{10\%}^{D_e}$  is the 0.1-quantile of  $D_e$ .

### 669 **Unsupervised analyses of the replicon space**

670 We represented the bacterial replicons (Supplementary Table 1) as vectors according to  
 671 their content in IS genes. The number of IS protein clusters retained for the analysis  
 672 determined the vector dimension and the number of proteins in a replicon assigned to  
 673 each cluster gave the value of each vector component. We built matrices  
 674  $P = \begin{bmatrix} p_{1,1} & \cdots & p_{1,m} \\ \vdots & \ddots & \vdots \\ p_{n,1} & \cdots & p_{n,m} \end{bmatrix}$ , where  $n$  is the number of replicons,  $m$  the number of protein  
 675 clusters, and  $p_{i,j}$  the number of proteins of the  $j^{th}$  cluster encoded by a gene present on the  
 676  $i^{th}$  replicon. We constructed several datasets to explore both the replicon type and the  
 677 host taxonomy effects on the separation of the replicons in the analyses (Table 12).

678 **Table 12. Reference classes used in the evaluation of the replicon IS protein-based**  
 679 **unsupervised clustering solutions**

| EVALUATED SEPARATION               | ENSEMBLE                                  | NORMALIZED ENSEMBLE <sup>a</sup>                                          |
|------------------------------------|-------------------------------------------|---------------------------------------------------------------------------|
| Chromosomes vs. Plasmids           | $\{R^{\{chromosome\}}, R^{\{plasmid\}}\}$ | $\{\overline{K}l_{genus}^{chromosome}, \overline{K}l_{genus}^{plasmid}\}$ |
| Chromosomes <i>per</i> host phylum | $Kl_{phylum}^{chromosome}$                | $\overline{K}l_{genus}^K   K \in Kl_{phylum}^{chromosome}$                |
| Chromosomes <i>per</i> host class  | $Kl_{class}^{chromosome}$                 | $\overline{K}l_{genus}^K   K \in Kl_{class}^{chromosome}$                 |
| Plasmids <i>per</i> host phylum    | $Kl_{phylum}^{plasmid}$                   | $\overline{K}l_{genus}^K   K \in Kl_{phylum}^{plasmid}$                   |
| Plasmids <i>per</i> host class     | $Kl_{class}^{plasmid}$                    | $\overline{K}l_{genus}^K   K \in Kl_{class}^{plasmid}$                    |

680 <sup>a</sup> Normalisation according to host genus

681 The taxonomic representation bias was taken into account by normalizing the data with

682 regard to the host genus: a consensus vector was built for each bacterial genus present in  
683 the datasets. The value of each vector attribute was calculated as the mean of the  
684 attribute values in the vectors of the replicons that belong to the same bacterial genus.

685 As a first approach, we transformed data into bipartite graphs whose vertices are the  
686 replicons and the proteins clusters. The graphs were spatialized using the force-directed  
687 layout algorithm ForceAtlas2 (Jacomy et al., 2014) implemented in Gephi (Bastian et al.,  
688 2009). Bipartite graphs are a powerful way of representing the data by naturally drawing  
689 the links between the replicons while enabling the detailed analysis of the IS cluster-  
690 based connections of each replicon by applying forces to each node with regard to its  
691 connecting edges. To investigate further the IS-based relationships of the replicons, we  
692 applied the community structure detection algorithm INFOMAP (Rosvall and  
693 Bergstrom, 2008) using the *igraph* python library (Csardi and Nepusz, 2006). We also  
694 performed a WARD hierarchical clustering (Johnson, 1967) after a dimension reduction  
695 of the data using a Principal Component Analysis (Hotelling, 1933). To select an  
696 optimal number of principal components, we relied on the measurements of the cluster  
697 stabilities using a *stability criterion* (Hennig, 2007) and retained the first 30 principal  
698 components (57% of the total variance). For consistency purpose, the number of clusters  
699 in the WARD analysis was chosen to match that obtained with the INFOMAP  
700 procedure. The number of clusters used was assessed by the stability index by Fang and  
701 Wang (2012) (Table 3). The quality of the projection and clustering results were  
702 confirmed using the V-measure indices (Rosenberg and Hirschberg, 2007) (*homogeneity*,  
703 *completeness*, *V-measure*) as external cluster evaluation measures (Table 3). The  
704 *homogeneity* indicates how uniform clusters are towards a class of reference. The  
705 *completeness* indicates whether reference classes are embedded within clusters. The *V-*  
706 *measure* is the harmonic mean between these two indices and indicates the quality of a

707 clustering solution relative to the classes of reference. These three indices vary between  
708 0 and 1, with values closest to 1 reflecting the good quality of the clustering solution.  
709 The type of replicons (*i.e.*, plasmid or chromosome) and the taxonomic affiliation  
710 (phylum or class) for chromosomes or plasmids were used as references classes (Table  
711 12). Additionally, the *stability criterion* (Hennig, 2007) of individual clusters, weighted  
712 by their size, for a given clustering result was evaluated using the bootstrapping of the  
713 original dataset as re-sampling scheme. Individual Jaccard coefficient for each replicon  
714 were computed as the number of times that a given replicon of a cluster in a clustering  
715 solution is also present in the closest cluster in the resampled datasets.

#### 716 **Functional characterization of the replicons and genomes**

717 In order to characterize the functional bias of the replicons, 117 IS functionalities (46  
718 from ACLAME and 71 from KEGG) were considered. When equivalent in plasmids and  
719 chromosomes, functions from ACLAME and KEGG databases were considered to be

720 distinct. A  $n*m$  matrix  $F = \begin{bmatrix} f_{1,1} & \cdots & f_{1,m} \\ \vdots & \ddots & \vdots \\ f_{n,1} & \cdots & f_{n,m} \end{bmatrix}$  with  $n$  the number of replicons and  $m$  the

721 number of IS functionalities, was used as input to the projection algorithms.  $f_{i,j}$   
722 represents the number of times that genes coding for proteins annotated with the  $j^{th}$   
723 function are present on the  $i^{th}$  replicon. Several datasets were analysed using PCA  
724 dimension reduction of the data followed by WARD hierarchical clustering (Table 3).

#### 725 **Logistic regression analyses**

726 Several reference classes of replicons and complete genomes were considered for  
727 comparison (Table 13). Ambiguous, *i.e.*, potentially adapted, plasmids belonging to  
728 INFOMAP clusters of plasmid replicons partially composed of SERs and/or  
729 chromosomes were removed from the plasmid class. When appropriate, the taxonomic



730 representation bias was taken into account by normalizing the data with regard to the  
 731 host genus as before. Logistic regressions (McCullagh and Nelder, 1989) were  
 732 performed for the 117 IS functions using the R glm package coupled to the python  
 733 binder rpy2. The computed  $P_{value}$  measured the probability of a functionality to be  
 734 predictive of a given group of replicons/genomes and the *Odd-Ratio* estimated how the  
 735 functionality occurrence influenced the belonging of a replicon/genome to a given  
 736 group.

737 **Table 13. Datasets used in the logistic regression analyses**

| ENSEMBLE OF REPLICONS OR GENOMES | NOTATION         | DATASET                               | DIMENSION <sup>a</sup> |
|----------------------------------|------------------|---------------------------------------|------------------------|
| Genus-normalized SERs            | $E_{SER}$        | $\bar{V}_{f,genus}^{R\{SER\}}$        | (28, 117)              |
| Genus-normalized plasmids        | $E_{plasmid}$    | $\bar{V}_{f,genus}^{R\{plasmid\}}$    | (262, 117)             |
| Genus-normalized chromosomes     | $E_{chromosome}$ | $\bar{V}_{f,genus}^{R\{chromosome\}}$ | (560, 117)             |

738 <sup>a</sup> (Number of replicons, number of functions)

### 739 **Supervised classification of replicons and genomes**

740 In order to identify putative ill-defined SERs and chromosomes amongst plasmids, we  
 741 performed supervised classification analyses using random forest procedures (Geurts et  
 742 al., 2006). We used the IS functionalities as the set of features and the whole sets of  
 743 chromosomes, plasmids and SER as sets of samples to build four classification studies  
 744 (Table 7) and detect SER candidates (plasmids vs. SERs) and chromosome candidates  
 745 (chromosomes vs. SERs or chromosomes vs. plasmids). Because of the unbalanced sizes  
 746 of the training classes (SERs vs. chromosomes and plasmids), iterative sampling  
 747 procedures were performed using 1000 random subsets of the largest class, with a size

748 similar to that of the smallest class. The ensuing results were averaged to build the class  
749 probabilities and relative importance of the variables. We also used the whole set of  
750 plasmids when compared to SERs, to identify more robust SER candidates. The  
751 discarding of plasmids in the iterative procedure increases the classifier sensitivity while  
752 reducing the rate of false negatives by including more plasmid-annotated putative true  
753 SERs, whereas it decreases the classifier precision while increasing the rate of false  
754 positives. The ExtraTreeClassifier (a classifier similar to Random Forest) class from the  
755 Scikit-learn python library (Pedregosa et al., 2011) was used to perform the  
756 classifications, with  $K=1000$ ,  $max\_feat=sqrt(number\ of\ variables)$  and  $min\_split=1$ . For  
757 each run, the *feature\_importances* and *estimate\_proba* functions were used to compute,  
758 respectively, the relative contribution of the input variables and the class probabilities of  
759 replicons/genomes. The statistical probability of a replicon/genome belonging to a class  
760 was calculated as the average predicted class of the trees in the forest. The relative  
761 contribution of the input variables was estimated according to Breiman (2001). The  
762 choices of the number of trees in the forest  $K$ , the number of variables selected for each  
763 split  $max\_feat$ , and the minimum number of samples required to split an internal node  
764  $min\_split$  were cross-validated using a *Leave-One-Out* scheme. The performance of the  
765 *Extremely-randomized-trees* classification procedures was assessed using a stratified 10-  
766 fold cross-validation procedure following Han *et al.* (2012), and the out-of-bag estimate  
767 (OOB score) (Izzenman, 2008; Pedregosa et al., 2011) computed using the *oob\_score*  
768 function of Scikit-learn python library.

#### 769 **Data availability**

770 The data supporting the findings of this study are available within the Article and  
771 its Supplementary Information or are available from the authors.

772 **REFERENCES**

- 773 Acosta-Cruz E, Wisniewski-Dyé F, Rouy Z, Barbe V, Valdés M, Mavingui P. 2012.  
774 Insights into the 1.59-Mbp largest plasmid of *Azospirillum brasilense* CBG497.  
775 *Archives in Microbiology*. **194**:725-736. doi: 10.1007/s00203-012-0805-2.
- 776 Alav I, Sutton JM, Rahman KM. 2018. Role of bacterial efflux pumps in biofilm  
777 formation. *Journal of Antimicrobial Chemotherapy*. **73**:2003-2020. doi:  
778 10.1093/jac/dky042.
- 779 Anes J, McCusker MP, Fanning S, Martins M. 2015. The ins and outs of RND efflux  
780 pumps in *Escherichia coli*. *Frontiers in Microbiology*. **6**:587. doi:  
781 10.3389/fmicb.2015.00587.
- 782 Baek JH, Chattoraj DK. 2014. Chromosome I controls chromosome II replication in  
783 *Vibrio cholerae*. *PLOS Genetics*. **10**:e1004184. doi:  
784 10.1371/journal.pgen.1004184.
- 785 Barbe V, Bouzon M, Mangenot S, Badet B, Poulain J, Segurens B, Vallenet D, Marlière  
786 P, Weissenbach J. 2011. Complete genome sequence of *Streptomyces cattleya*  
787 NRRL 8057, a producer of antibiotics and fluorometabolites. *Journal of*  
788 *Bacteriology*. **193**:5055-5056. doi: 10.1128/JB.05583-11.
- 789 Bastian M, Heymann S, Jacomy M. 2009. Gephi: An open source software for exploring  
790 and manipulating networks. *Third International AAAI Conference on Weblogs*  
791 *and Social Media, San Jose Mc Enery Convention Center, May 17, 2009 - May*  
792 *20, 2009: AAAI Publications*.
- 793 Blanco-Ordóñez H, Oliva-García JJ, Pérez-Mendoza D, Soto MJ, Olivares J, Sanjúan J,  
794 Nogales J. 2010. pSymA-dependent mobilization of the *Sinorhizobium meliloti*  
795 pSymB megaplasmid. *Journal of Bacteriology*. **192**:6309-6312. doi:

796 10.1128/JB.00549-10.

797 Breiman L. 2001. Random forests. *Machine Learning*. **45**:5-32. doi:  
798 10.1023/A:1010933404324.

799 Brom S, García-de los Santos A, Cervantes L, Palacios R, Romero D. 2000. In  
800 *Rhizobium etli* symbiotic plasmid transfer, nodulation competitiveness and cellular  
801 growth require interaction among different replicons. *Plasmid*. **44**:34-43. doi:  
802 10.1006/plas.2000.1469

803 Camacho CJ, Coulouris G, Avagyan V, Ma N, Papadopoulos J, Bealer K, Madden TL.  
804 2009. BLAST+: architecture and applications. *BMC Bioinformatics*. **10**:421. doi:  
805 10.1186/1471-2105-10-421.

806 Casjens SR. 1998. The diverse and dynamic structure of bacterial genomes. *Annual*  
807 *review of genetics*. **32**:339-377. doi: 10.1146/annurev.genet.32.1.339.

808 Cervantes L, Bustos P, Girard L, Santamaría RI, Dávila G, Vinuesa P, Romero D, Brom  
809 S. 2011. The conjugative plasmid of a bean-nodulating *Sinorhizobium fredii*  
810 strain is assembled from sequences of two *Rhizobium* plasmids and the  
811 chromosome of a *Sinorhizobium* strain. *BMC microbiology*. **11**:149. doi:  
812 10.1186/1471-2180-11-149.

813 Chen Y, Milam SL, Erickson HP. 2012. SulaA inhibits assembly of FtsZ by a simple  
814 sequestration mechanism. *Biochemistry*. **51**:3100–3109. doi: 10.1021/bi201669d.

815 Chodavarapu S, Jones AD, Feig M, Kaguni JM. 2016. DnaC traps DnaB as an open ring  
816 and remodels the domain that binds primase. *Nucleic Acids Research*. **44**:210-  
817 220. doi: 10.1093/nar/gkv961.

818 Csárdi G, Nepusz T. 2006. The igraph software package for complex network research.  
819 *InterJournal, Complex Systems*.1695.

820 Datta S, Datta S. 2006. Methods for evaluating clustering algorithms for gene expression

821 data using a reference set of functional classes. *BMC Bioinformatics*. **7**:397. doi:  
822 10.1186/1471-2105-7-397.

823 De Nisco NJ, Abo RP, Wu CM, Penterman J, Walker GC. 2014. Global analysis of cell  
824 cycle gene expression of the legume symbiont *Sinorhizobium meliloti*.  
825 *Proceedings of the National Academy of Sciences of the United States of*  
826 *America*. **111**:3217-3224. doi: 10.1073/pnas.1400421111.

827 Deghelt M, Mullier C, Sternon JF, Francis N, Laloux G, Dotreppe D, Van der Henst C,  
828 Jacobs-Wagner C, Letesson JJ, De Bolle X. 2014. G1-arrested newborn cells are  
829 the predominant infectious form of the pathogen *Brucella abortus*. *Nature*  
830 *communications*. **5**:4366. doi: 10.1038/ncomms5366.

831 Demarre G, Galli E, Muresan L, Paly E, David A, Possoz C, Barre F-X. 2014.  
832 Differential management of the replication terminus regions of the two *Vibrio*  
833 *cholerae* chromosomes during cell division. *PLOS Genetics*. **10**:e1004557. doi:  
834 10.1371/journal.pgen.1004557.

835 diCenzo G, Milunovic B, Cheng J, Finan TM. 2013. The tRNA<sup>arg</sup> gene and *engA* are  
836 essential genes on the 1.7-Mb pSymB megaplasmid of *Sinorhizobium meliloti*  
837 and were translocated together from the chromosome in an ancestral strain.  
838 *Journal of Bacteriology*. **195**:202-212. doi: 10.1128/JB.01758-12.

839 diCenzo GC, Finan TM. 2017. The divided bacterial genome: structure, function, and  
840 evolution. *Microbiology and Molecular Biology Reviews*. **81**:e00019-00017. doi:  
841 10.1128/MMBR.00019-17.

842 diCenzo GC, MacLean AM, Milunovic B, Golding GB, Finan TM. 2014. Examination  
843 of prokaryotic multipartite genome evolution through experimental genome  
844 reduction. *PLOS Genetics*. **10**:e1004742. doi: 10.1371/journal.pgen.1004742.

845 diCenzo GC, Wellappili D, Golding GB, Finan TM. 2018. Inter-replicon gene flow

846 contributes to transcriptional integration in the *Sinorhizobium meliloti*  
847 multipartite genome. *G3 (Bethesda)*. **8**:1711-1720. doi: 10.1534/g3.117.300405.

848 Dillon SC, Dorman CJ. 2010. Bacterial nucleoid-associated proteins, nucleoid structure  
849 and gene expression. *Nat Rev Microbiol*. **8**:185-195. doi: 10.1038/nrmicro2261.

850 Drevinek P, Baldwin A, Dowson CG, Mahenthiralingam E. 2008. Diversity of the *parB*  
851 and *repA* genes of the *Burkholderia cepacia* complex and their utility for rapid  
852 identification of *Burkholderia cenocepacia*. *BMC microbiology*. **8**:44. doi:  
853 10.1186/1471-2180-8-44.

854 Du D, Wang-Kan X, Neuberger A, van Veen HW, Pos KM, Piddock LJV, Luisi BF.  
855 2018. Multidrug efflux pumps: structure, function and regulation. *Nature Review*  
856 *in Microbiology*. **16**:523-539. doi: 10.1038/s41579-018-0048-6.

857 Dubarry N, Pasta F, Lane D. 2006. ParABS systems of the four replicons of  
858 *Burkholderia cenocepacia*: new chromosome centromeres confer partition  
859 specificity. *Journal of Bacteriology*. **188**:1489-1496. doi:  
860 10.1128/JB.188.4.1489-1496.2006.

861 Egan ES, Lobner-Olesen A, Waldor MK. 2004. Synchronous replication initiation of the  
862 two *Vibrio cholerae* chromosomes. *Current Biology*. **14**:R501-502. doi:  
863 10.1016/j.cub.2004.06.036.

864 Egan ES, Waldor MK. 2003. Distinct replication requirements for the two *Vibrio*  
865 *cholerae* chromosomes. *Cell*. **114**:521-530. doi: 10.1016/s0092-8674(03)00611-  
866 1.

867 Enright AJ, Dongen S, Ouzounis C. 2002. An efficient algorithm for large-scale  
868 detection of protein families. *Nucleic Acids Research*. **30**:1575-1584. doi:  
869 10.1093/nar/30.7.1575.

870 Fang Y, Wang J. 2012. Selection of the number of clusters via the bootstrap method.

871 *Computational Statistics & Data Analysis*. **56**:468-477. doi:  
872 10.1016/j.csda.2011.09.003.

873 Fiebig A, Keren K, Theriot JA. 2006. Fine-scale time-lapse analysis of the biphasic,  
874 dynamic behaviour of the two *Vibrio cholerae* chromosomes. *Molecular*  
875 *Microbiology*. **60**:1164-1178. doi: 10.1111/j.1365-2958.2006.05175.x.

876 Finn RD, Clements J, Eddy SR. 2011. HMMER web server: interactive sequence  
877 similarity searching. *Nucleic Acids Research*. **39**:W29-37. doi:  
878 10.1093/nar/gkr367.

879 Finn RD, Coghill P, Eberhardt RY, Eddy SR, Mistry J, Mitchell AL, Potter SC, Punta  
880 M, Qureshi M, Sangrador-Vegas A, Salazar GA, Tate J, Bateman A. 2016. The  
881 Pfam protein families database: towards a more sustainable future. *Nucleic Acids*  
882 *Research*. **44**:D279-285. doi: 10.1093/nar/gkv1344.

883 Frage B, Dohlemann J, Robledo M, Lucena D, Sobetzko P, Graumann PL, Becker A.  
884 2016. Spatiotemporal choreography of chromosome and megaplastids in the  
885 *Sinorhizobium meliloti* cell cycle. *Molecular Microbiology*. **100**:808-823. doi:  
886 10.1111/mmi.13351.

887 Galardini M, Mengoni A, Brilli M, Pini F, Fioravanti A, Lucas S, Lapidus A, Cheng JF,  
888 Goodwin L, Pitluck S, Land M, Hauser L, Woyke T, Mikhailova N, Ivanova N,  
889 Daligault H, Bruce D, Detter C, Tapia R, Han C, Teshima H, Mocali S,  
890 Bazzicalupo M, Biondi EG. 2011. Exploring the symbiotic pangenome of the  
891 nitrogen-fixing bacterium *Sinorhizobium meliloti*. *BMC Genomics*. **12**:235. doi:  
892 10.1186/1471-2164-12-235.

893 Galardini M, Pini F, Bazzicalupo M, Biondi G, Mengoni A. 2013. Replicon-dependent  
894 bacterial genome evolution: the case of *Sinorhizobium meliloti*. *Genome Biology*  
895 *and Evolution*. **5**:542-558. doi: 10.1093/gbe/evt027.

896 Galardini M, Brilli M, Spini G, Rossi M, Roncaglia B, Bani A, Chianciani M, Moretto  
897 M, Engelen K, Bacci G, Pini F, Biondi EG, Bazzicalupo M, Mengoni A. 2015.  
898 Evolution of Intra-specific Regulatory Networks in a Multipartite Bacterial  
899 Genome. *PLoS Computational Biology* **11**:e1004478. doi:  
900 10.1371/journal.pcbi.1004478.

901 Galli E, Poidevin M, Le Bars R, Desfontaines JM, Muresan L, Paly E, Yamaichi Y,  
902 Barre FX. 2016. Cell division licensing in the multi-chromosomal *Vibrio*  
903 *cholerae* bacterium. *Nat Microbiology*. **1**:16094. doi:  
904 10.1038/nmicrobiol.2016.94.

905 Gerding MA, Chao MC, Davis BM, Waldor MK. 2015. Molecular dissection of the  
906 essential features of the origin of replication of the second *Vibrio cholerae*  
907 chromosome. *MBio*. **6**:e00973. doi: 10.1128/mBio.00973-15.

908 Geurts P, Ernst D, Wehenkel L. 2006. Extremely randomized trees. *Machine Learning*.  
909 **63**:3-42. doi: 10.1007/s10994-006-6226-1.

910 Guo FB, Ning LW, Huang J, Lin H, Zhang HX. 2010. Chromosome translocation and its  
911 consequence in the genome of *Burkholderia cenocepacia* AU-1054. *Biochemical*  
912 *and Biophysical Research Communications*. **403**:375-379. doi:  
913 10.1016/j.bbrc.2010.11.039.

914 Guo X, Flores M, Mavingui P, Fuentes SI, Hernandez G, Davila G, Palacios R. 2003.  
915 Natural genomic design in *Sinorhizobium meliloti*: novel genomic architectures.  
916 *Genome Research*. **13**:1810-1817. doi: 10.1101/gr.1260903.

917 Hall JPJ, Brockhurst MA, Dytham C, Harrison E. 2017. The evolution of plasmid  
918 stability: Are infectious transmission and compensatory evolution competing  
919 evolutionary trajectories? *Plasmid*. **91**:90-95. doi:  
920 10.1016/j.plasmid.2017.04.003.



921 Han J, Kamber M, Pei J. 2012. Data Mining: Concepts and Techniques, Third Edition:  
922 Morgan kaufmann, Elsevier.

923 Harrison PW, Lower RP, Kim NK, Young JPW. 2010. Introducing the bacterial  
924 'chromid': not a chromosome, not a plasmid. *Trends in Microbiology*. **18**:141-  
925 148. doi: 10.1016/j.tim.2009.12.010.

926 Hennig C. 2007. Cluster-wise assessment of cluster stability. *Computational Statistics &*  
927 *Data Analysis*. **52**:258-271. doi: 10.1016/j.csda.2006.11.025.

928 Hotelling H. 1933. Analysis of a complex of statistical variables into principal  
929 components. *Journal of Educational Psychology*. **24**:417. doi:  
930 10.1037/h0071325.

931 Izenman AJ. 2008. Modern multivariate statistical techniques: regression, classification,  
932 and manifold learning: Springer-Verlag, New York Inc.

933 Jacomy M, Venturini T, Heymann S, Bastian M. 2014. ForceAtlas2, a continuous graph  
934 layout algorithm for handy network visualization designed for the Gephi  
935 software. *PLoS One*. **9**:e98679. doi: 10.1371/journal.pone.0098679.

936 Jiao J, Ni M, Zhang B, Zhang Z, Young JPW, Chan TF, Chen WX, Lam HM, Tian CF.  
937 2018. Coordinated regulation of core and accessory genes in the multipartite  
938 genome of *Sinorhizobium fredii*. *PLoS Genetics* **14**:e1007428. doi:  
939 10.1371/journal.pgen.1007428.

940 Johnson SC. 1967. Hierarchical clustering schemes. *Psychometrika*. **32**:241-254.

941 Kahng LS, Shapiro L. 2003. Polar localization of replicon origins in the multipartite  
942 genomes of *Agrobacterium tumefaciens* and *Sinorhizobium meliloti*. *Journal of*  
943 *Bacteriology*. **185**:3384-3391. doi: 10.1128/jb.185.11.3384-3391.2003.

944 Kanehisa M, Goto S, Sato Y, Furumichi M, Tanabe M. 2012. KEGG for integration and  
945 interpretation of large-scale molecular data sets. *Nucleic Acids Research*.

946           **40**:D109-114. doi: 10.1093/nar/gkr988.

947   Kemter FS, Messerschmidt SJ, Schallopp N, Sobetzko P, Lang E, Bunk B, Sproer C,  
948           Teschler JK, Yildiz FH, Overmann J, Waldminghaus T. 2018. Synchronous  
949           termination of replication of the two chromosomes is an evolutionary selected  
950           feature in Vibrionaceae. *PLOS Genetics*. **14**:e1007251. doi:  
951           10.1371/journal.pgen.1007251.

952   Krawiec S, Riley M. 1990. Organization of the bacterial chromosome. *Microbiological*  
953           *Reviews*. **54**:502-539.

954   Landeta C, Dávalos A, Cevallos MÁ, Geiger O, Brom S, Romero D. 2011. Plasmids  
955           with a chromosome-like role in rhizobia. *Journal of Bacteriology*. **193**:1317-  
956           1326. doi: 10.1128/JB.01184-10.

957   Lederberg J. 1998. Plasmid (1952-1997). *Plasmid*. **39**:1-9. doi: 10.1006/plas.1997.1320.

958   Leplae R, Lima-Mendez G, Toussaint A. 2010. ACLAME: a CLAssification of Mobile  
959           genetic Elements, update 2010. *Nucleic Acids Research*. **38**:D57-61. doi:  
960           10.1093/nar/gkp938.

961   Li Y, Canchaya C, Fang F, Raftis E, Ryan KA, van Pijkeren J-P, van Sinderen D,  
962           O'Toole PW. 2007. Distribution of megaplasmids in *Lactobacillus salivarius* and  
963           other lactobacilli. *Journal of Bacteriology*. **189**:6128-6139. doi:  
964           10.1128/JB.00447-07.

965   Lioy VS, Cournac A, Marbouty M, Duigou S, Mozziconacci J, Espeli O, Boccard F,  
966           Koszul R. 2018. Multiscale structuring of the *E. coli* chromosome by nucleoid-  
967           associated and condensin proteins. *Cell*. **172**:771-783 e718. doi:  
968           10.1016/j.cell.2017.12.027.

969   Liu G, Yong MY, Yurieva M, Srinivasan KG, Liu J, Lim JS, Poidinger M, Wright GD,  
970           Zolezzi F, Choi H, Pavelka N, Rancati G. 2015. Gene essentiality is a

971 quantitative property linked to cellular evolvability. *Cell*. **163**:1388-1399. doi:  
972 10.1016/j.cell.2015.10.069.

973 Livny J, Yamaichi Y, Waldor MK. 2007. Distribution of centromere-like parS sites in  
974 bacteria: insights from comparative genomics. *Journal of Bacteriology*.  
975 **189**:8693-8703. doi: 10.1128/JB.01239-07.

976 Lu C, Nakayasu ES, Zhang LQ, Luo ZQ. 2016. Identification of Fic-1 as an enzyme that  
977 inhibits bacterial DNA replication by AMPylating GyrB, promoting filament  
978 formation. *Science Signal*. **9**:ra11. doi: 10.1126/scisignal.aad0446.

979 Mackenzie C, Kaplan S, Choudhary M. 2004. Multiple chromosomes. *In: Miller RV and*  
980 *Day MJ, editors. Microbial Evolution: Gene Establishment, Survival, and*  
981 *Exchange: ASM press, Washington DC:82-101.*

982 Mackenzie C, Simmons AE, Kaplan S. 1999. Multiple chromosomes in bacteria: the Yin  
983 and Yang of *trp* gene localization in *Rhodobacter sphaeroides* 2.4.1. *Genetics*.  
984 **153**:525-538.

985 MacLellan SR, Sibley CD, Finan TM. 2004. Second chromosomes and megaplasmids in  
986 bacteria. *In: Funnell BE and Phillips GJ, editors. Plasmid biology: ASM press,*  
987 *Washington DC:529-542.*

988 MacLellan SR, Zaheer R, Sartor AL, MacLean AM, Finan TM. 2006. Identification of a  
989 megaplasmid centromere reveals genetic structural diversity within the repABC  
990 family of basic replicons. *Molecular Microbiology*. **59**:1559-1575. doi:  
991 10.1111/j.1365-2958.2005.05040.x.

992 Maida I, Fondi M, Orlandini V, Emiliani G, Papaleo MC, Perrin E, Fani R. 2014.  
993 Origin, duplication and reshuffling of plasmid genes: Insights from *Burkholderia*  
994 *vietnamiensis* G4 genome. *Genomics*. **103**:229-238. doi:  
995 10.1016/j.ygeno.2014.02.004.

996 McCullagh P, Nelder JA. 1989. Generalized linear models, Second Edition: Chapman &  
997 Hall/CRC, London. 532 p.

998 Medema MH, Trefzer A, Kovalchuk A, van den Berg M, Muller U, Heijne W, Wu L,  
999 Alam MT, Ronning CM, Nierman WC, Bovenberg RA, Breitling R, Takano E.  
1000 2010. The sequence of a 1.8-mb bacterial linear plasmid reveals a rich  
1001 evolutionary reservoir of secondary metabolic pathways. *Genome Biology and*  
1002 *Evolution*. **2**:212-224. doi: 10.1093/gbe/evq013.

1003 Meier EL, Daitch AK, Yao Q, Bhargava A, Jensen GJ, Goley ED. 2017. FtsEX-  
1004 mediated regulation of the final stages of cell division reveals morphogenetic  
1005 plasticity in *Caulobacter crescentus*. *PLoS Genetics* **13**: e1006999. doi:  
1006 10.1371/journal.pgen.1006999.

1007 Million-Weaver S, Camps M. 2014. Mechanisms of plasmid segregation: have  
1008 multicopy plasmids been overlooked? *Plasmid*. **75**:27-36. doi:  
1009 10.1016/j.plasmid.2014.07.002.

1010 Murray H, Errington J. 2008. Dynamic control of the DNA replication initiation protein  
1011 DnaA by Soj/ParA. *Cell*. **135**:74-84. doi: 10.1016/j.cell.2008.07.044.

1012 Naito M, Ogura Y, Itoh T, Shoji M, Okamoto M, Hayashi T, Nakayama K. 2016. The  
1013 complete genome sequencing of *Prevotella intermedia* strain OMA14 and a  
1014 subsequent fine-scale, intra-species genomic comparison reveal an unusual  
1015 amplification of conjugative and mobile transposons and identify a novel  
1016 *Prevotella*-lineage-specific repeat. *DNA Research*. **23**:11-19. doi:  
1017 10.1093/dnares/dsv032.

1018 Ohtani N, Tomita M, Itaya M. 2010. An extreme thermophile, *Thermus thermophilus*, is  
1019 a polyploid bacterium. *Journal of Bacteriology*. **192**:5499-5505. doi:  
1020 10.1128/JB.00662-10.

1021 Passot FM, Calderon V, Fichant G, Lane D, Pasta F. 2012. Centromere binding and  
1022 evolution of chromosomal partition systems in the Burkholderiales. *Journal of*  
1023 *Bacteriology*. **194**:3426-3436. doi: 10.1128/JB.00041-12.

1024 Pedregosa F, Weiss R, Brucher M. 2011. Scikit-learn : Machine Learning in Python.  
1025 *Journal of Machine Learning Research*. **12**:2825-2830.  
1026 <http://www.jmlr.org/papers/volume12/pedregosa11a/pedregosa11a.pdf>.

1027 Petersen J, Frank O, Göker M, Pradella S. 2013. Extrachromosomal, extraordinary and  
1028 essential--the plasmids of the *Roseobacter* clade. *Applied Microbiology and*  
1029 *Biotechnology*. **97**:2805-2815. doi: 10.1007/s00253-013-4746-8.

1030 Pinto UM, Pappas KM, Winans SC. 2012. The ABCs of plasmid replication and  
1031 segregation. *Nature Review in Microbiology*. **10**:755-765. doi:  
1032 10.1038/nrmicro2882.

1033 Pruitt KD, Tatusova T, Maglott DR. 2005. NCBI Reference Sequence (RefSeq): a  
1034 curated non-redundant sequence database of genomes, transcripts and proteins.  
1035 *Nucleic Acids Research*. **33**:D501-504. doi: 10.1093/nar/gki025.

1036 Rasmussen T, Jensen RB, Skovgaard O. 2007. The two chromosomes of *Vibrio cholerae*  
1037 are initiated at different time points in the cell cycle. *EMBO Journal*. **26**:3124-  
1038 3131. doi: 10.1038/sj.emboj.7601747.

1039 Reyes-Lamothe R, Tran T, Meas D, Lee L, Li AM, Sherratt DJ, Tolmasky ME. 2014.  
1040 High-copy bacterial plasmids diffuse in the nucleoid-free space, replicate  
1041 stochastically and are randomly partitioned at cell division. *Nucleic Acids*  
1042 *Research*. **42**:1042-1051. doi: 10.1093/nar/gkt918.

1043 Rosenberg A, Hirschberg J. 2007. V-Measure: A conditional entropy-based external  
1044 cluster evaluation measure. *Proceedings of the 2007 Joint Conference on*  
1045 *Empirical Methods in Natural Language Processing and Computational Natural*

1046        *Language Learning (EMNLP-CoNLL)*        p.        410-420.  
1047        [https://www.researchgate.net/publication/221012656\\_V-](https://www.researchgate.net/publication/221012656_V-Measure_A_Conditional_Entropy-Based_External_Cluster_Evaluation_Measure)  
1048        *Measure\_A\_Conditional\_Entropy-*  
1049        *Based\_External\_Cluster\_Evaluation\_Measure.*

1050        Rosvall M, Bergstrom CT. 2008. Maps of random walks on complex networks reveal  
1051        community structure. *Proceedings of the National Academy of Sciences of the*  
1052        *United States of America.* **105**:1118-1123. doi: 10.1073/pnas.0706851105.

1053        San Millan A, Peña-Miller R, Toll-Riera M, Halbert ZV, McLean aR, Cooper BS,  
1054        MacLean RC. 2014. Positive selection and compensatory adaptation interact to  
1055        stabilize non-transmissible plasmids. *Nature communications.* **5**:5208. doi:  
1056        10.1038/ncomms6208.

1057        Slater SC, Goldman BS, Goodner B, Setubal JC, Farrand SK, Nester EW, Burr TJ,  
1058        Banta L, Dickerman AW, Paulsen I, Otten L, Suen G, Welch R, Almeida NF,  
1059        Arnold F, Burton OT, Du Z, Ewing A, Godsy E, Heisel S, Houmiel KL, Jhaveri  
1060        J, Lu J, Miller NM, Norton S, Chen Q, Phoolcharoen W, Ohlin V, Ondrusek D,  
1061        Pride N, Stricklin SL, Sun J, Wheeler C, Wilson L, Zhu H, Wood DW. 2009.  
1062        Genome sequences of three *Agrobacterium* biovars help elucidate the evolution  
1063        of multichromosome genomes in bacteria. *Journal of Bacteriology.* **191**:2501-  
1064        2511. doi: 10.1128/JB.01779-08.

1065        Srivastava P, Fekete RA, Chatteraj DK. 2006. Segregation of the replication terminus of  
1066        the two *Vibrio cholerae* chromosomes. *Journal of Bacteriology.* **188**:1060-1070.  
1067        doi: 10.1128/JB.188.3.1060-1070.2006.

1068        Stalder T, Rogers LM, Renfrow C, Yano H, Smith Z, Top EM. 2017. Emerging patterns  
1069        of plasmid-host coevolution that stabilize antibiotic resistance. *Scientific Reports.*  
1070        **7**:4853. doi: 10.1038/s41598-017-04662-0.

1071 Stokke C, Waldminghaus T, Skarstad K. 2011. Replication patterns and organization of  
1072 replication forks in *Vibrio cholerae*. *Microbiology*. **157**:695-708. doi:  
1073 10.1099/mic.0.045112-0.

1074 Sýkora P. 1992. Macroevolution of plasmids: A model for plasmid speciation. *Journal*  
1075 *of theoretical biology*. **159**:53-65. doi: 10.1016/s0022-5193(05)80767-2.

1076 Val M-E, Kennedy SP, El Karoui M, Bonn   L, Chevalier F, Barre F-X. 2008. FtsK-  
1077 dependent dimer resolution on multiple chromosomes in the pathogen *Vibrio*  
1078 *cholerae*. *PLOS Genetics*. **4**:e1000201. doi: 10.1371/journal.pgen.1000201.

1079 Val M-E, Kennedy SP, Soler-Bistue  AJ, Barbe V, Bouchier C, Ducos-Galand M,  
1080 Skovgaard O, Mazel D. 2014. Fuse or die: how to survive the loss of Dam in  
1081 *Vibrio cholerae*. *Molecular Microbiology*. **91**:665-678. doi: 10.1111/mmi.12483.

1082 Venkova-Canova T, Chattoraj DK. 2011. Transition from a plasmid to a chromosomal  
1083 mode of replication entails additional regulators. *Proceedings of the National*  
1084 *Academy of Sciences of the United States of America*. **108**:6199-6204. doi:  
1085 10.1073/pnas.1013244108.

1086 Villase  or T, Brom S, Davalos A, Lozano L, Romero D, Los Santos AG. 2011.  
1087 Housekeeping genes essential for pantothenate biosynthesis are plasmid-encoded  
1088 in *Rhizobium etli* and *Rhizobium leguminosarum*. *BMC microbiology*. **11**:66. doi:  
1089 10.1186/1471-2180-11-66.

1090 Vuilleumier S, Chistoserdova L, Lee MC, Bringel F, Lajus A, Zhou Y, Gourion B,  
1091 Barbe V, Chang J, Cruveiller S, Dossat C, Gillett W, Gruffaz C, Haugen E,  
1092 Hourcade E, Levy R, Mangenot S, Muller E, Nadalig T, Pagni M, Penny C,  
1093 Peyraud R, Robinson DG, Roche D, Rouy Z, Saenampechek C, Salvignol G,  
1094 Vallenet D, Wu Z, Marx CJ, Vorholt JA, Olson MV, Kaul R, Weissenbach J,  
1095 Medigue C, Lidstrom ME. 2009. *Methylobacterium* genome sequences: a

1096 reference blueprint to investigate microbial metabolism of C1 compounds from  
1097 natural and industrial sources. *PLoS One*. **4**:e5584. doi:  
1098 10.1371/journal.pone.0005584.

1099 Webber MA, Bailey AM, Blair JM, Morgan E, Stevens MP, Hinton JC, Ivens A, Wain  
1100 J, Piddock LJ. 2009. The global consequence of disruption of the AcrAB-TolC  
1101 efflux pump in *Salmonella enterica* includes reduced expression of SPI-1 and  
1102 other attributes required to infect the host. *Journal of Bacteriology*. **191**:4276-  
1103 4285. doi: 10.1128/JB.00363-09.

1104 Wisniewski-Dyé F, Borziak K, Khalsa-Moyers G, Alexandre G, Sukharnikov LO,  
1105 Wuichet K, Hurst GB, McDonald WH, Robertson JS, Barbe V, Calteau A, Rouy  
1106 Z, Mangenot S, Prigent-Combaret C, Normand P, Boyer M, Siguier P, Dessaux  
1107 Y, Elmerich C, Condemine G, Krishnen G, Kennedy I, Paterson AH, González  
1108 V, Mavingui P, Zhulin IB. 2011. *Azospirillum* genomes reveal transition of  
1109 bacteria from aquatic to terrestrial environments. *PLOS Genetics*. **7**:e1002430.  
1110 doi: 10.1371/journal.pgen.1002430.

1111 Wisniewski-Dyé F, Lozano L, Acosta-Cruz E, Borland S, Drogue B, Prigent-Combaret  
1112 C, Rouy Z, Barbe V, Mendoza Herrera A, González V, Mavingui P. 2012.  
1113 Genome sequence of *Azospirillum brasilense* CBG497 and comparative analyses  
1114 of *Azospirillum* core and accessory genomes provide Insight into niche  
1115 adaptation. *Genes (Basel)*. **3**:576-602. doi: 10.3390/genes3040576.

1116 Xie G, Johnson SL, Davenport KW, Rajavel M, Waldminghaus T, Detter JC, Chain PS,  
1117 Sozhamannan S. 2017. Exception to the rule: genomic characterization of  
1118 naturally occurring unusual *Vibrio cholerae* strains with a single chromosome.  
1119 *International Journal of Genomics*. **2017**:8724304. doi: 10.1155/2017/8724304.

1120 Yamaichi Y, Fogel MA, McLeod SM, Hui MP, Waldor MK. 2007. Distinct centromere-



1121           like *parS* sites on the two chromosomes of *Vibrio* spp. *Journal of Bacteriology*.  
1122           **189**:5314-5324. doi: 10.1128/JB.00416-07.

1123 Yamamoto S, Lee K-i, Morita M, Arakawa E, Izumiya H, Ohnishi M. 2018. Single  
1124           circular chromosome identified from the genome sequence of the *Vibrio*  
1125           *cholerae* O1 bv. El Tor Ogawa strain V060002. *Genome Announcements*. **6**. doi:  
1126           10.1128/genomeA.00564-18.

1127 Yeoman CJ, Kelly WJ, Rakonjac J, Leahy SC, Altermann E, Attwood GT. 2011. The  
1128           large episomes of *Butyrivibrio proteoclasticus* B316T have arisen through  
1129           intragenomic gene shuttling from the chromosome to smaller *Butyrivibrio*-  
1130           specific plasmids. *Plasmid*. **66**:67-78. doi: 10.1016/j.plasmid.2011.05.002.

1131 **SUPPLEMENTARY TABLES**

1132 Table 1. Replicon dataset

1133 Table 2. INFOMAP IS protein-based clustering solution of the 4928 replicons

1134 Table 3. PCA + WARD IS protein-based clustering solution of the 4928 replicons

1135 Table 4. PCA + WARD IS function-based clustering solution of the 4928 replicons
